# Supplementary material for: Is high-sensitivity troponin, alone or in combination with copeptin, sensitive enough for ruling out NSTEMI in very early presenters at admission? A post hoc analysis performed in emergency departments
Source: PubMed Central journal article supplement — BMJ Open. 2019 Jun 16;9(6):e023994. doi: 10.1136/bmjopen-2018-023994 (PMC6589015; doi:10.1136/bmjopen-2018-023994), 2019-06-16

# BMJ Open

BMJ Open is committed to open peer review. As part of this commitment we make the peer review history of every article we publish publicly available.

When an article is published we post the peer reviewers' comments and the authors' responses online. We also post the versions of the paper that were used during peer review. These are the versions that the peer review comments apply to.

The versions of the paper that follow are the versions that were submitted during the peer review process. They are not the versions of record or the final published versions. They should not be cited or distributed as the published version of this manuscript.

BMJ Open is an open access journal and the full, final, typeset and author-corrected version of record of the manuscript is available on our site with no access controls, subscription charges or pay-per-view fees (<http://bmjopen.bmj.com>).

If you have any questions on BMJ Open's open peer review process please email [info.bmjopen@bmj.com](mailto:info.bmjopen@bmj.com)

# BMJ Open

## Is high-sensitivity troponin (alone or in combination with copeptin) enough for ruling out NSTEMI in very early presenters at admission?

|                               |                                                                                                                                                                                                                                                                                                                                                                                                                                                                                                                                                                                                           |
|-------------------------------|-----------------------------------------------------------------------------------------------------------------------------------------------------------------------------------------------------------------------------------------------------------------------------------------------------------------------------------------------------------------------------------------------------------------------------------------------------------------------------------------------------------------------------------------------------------------------------------------------------------|
| Journal:                      | <i>BMJ Open</i>                                                                                                                                                                                                                                                                                                                                                                                                                                                                                                                                                                                           |
| Manuscript ID                 | bmjopen-2018-023994                                                                                                                                                                                                                                                                                                                                                                                                                                                                                                                                                                                       |
| Article Type:                 | Research                                                                                                                                                                                                                                                                                                                                                                                                                                                                                                                                                                                                  |
| Date Submitted by the Author: | 12-Jun-2018                                                                                                                                                                                                                                                                                                                                                                                                                                                                                                                                                                                               |
| Complete List of Authors:     | Chenevier-Gobeaux, Camille; Hopital Cochin, SDBA<br>Sebbane, Mustapha<br>Meune, Christophe; Avicenne University Hospital, Cardiology; Paris 13 University,<br>Lefebvre, Sophie; Centre Hospitalier Regional Universitaire de Montpellier<br>Dupuy, Anne-Marie; Montpellier University Hospital Centre, Department of Biochemistry<br>Lefevre, Guillaume; Hopital Tenon, Laboratoire de Biochimie et Hormonologie<br>Peschanski, Nicolas; CHU de Rouen, Service des Urgences Adultes; Institute for Biomedical Research and Innovation , INSERM U1096<br>Ray, Patrick; Hopital Tenon, Emergency Department |
| Keywords:                     | high sensitive cardiac troponin, non ST-elevation acute myocardial infarction, copeptin, very early presenters, chest pain onset                                                                                                                                                                                                                                                                                                                                                                                                                                                                          |
|                               |                                                                                                                                                                                                                                                                                                                                                                                                                                                                                                                                                                                                           |

SCHOLARONE™  
Manuscripts

1  
2  
3 **Is high-sensitivity troponin (alone or in combination with copeptin) enough for ruling**  
4 **out NSTEMI in very early presenters at admission?**  
5

6  
7 Camille Chenevier-Gobeaux (1), Mustafa Sebbane (2), Christophe Meune (3, 4), Sophie  
8  
9 Lefebvre (2), Anne-Marie Dupuy (5), Guillaume Lefèvre (6, 7), Nicolas Peschanski (8),  
10  
11 Patrick Ray (7, 8, 9)  
12  
13  
14  
15

16 **Authors' affiliations**

17 (1) Service de Diagnostic Biologique Automatisé, Hôpital Cochin, Hôpitaux Universitaires  
18 Paris Centre (HUPC), Assistance Publique des Hôpitaux de Paris (AP-HP), Paris, France.  
19 [camille.gobeaux@aphp.fr](mailto:camille.gobeaux@aphp.fr)  
20 (2) Département des Urgences, Hôpital Lapeyronie, CHU de Montpellier, Montpellier, France.  
21 [m-sebbane@chu-montpellier.fr](mailto:m-sebbane@chu-montpellier.fr) ; [s-lefevre@chu-montpellier.fr](mailto:s-lefevre@chu-montpellier.fr)  
22 (3). Service de Cardiologie, Hôpital Avicenne, Hôpitaux Universitaires Paris Seine Saint  
23 Denis, Assistance Publique des Hôpitaux de Paris (AP-HP), Bobigny; Université Paris 13,  
24 Paris, France. [christophe.meune@aphp.fr](mailto:christophe.meune@aphp.fr)  
25 (4) INSERM UMR S-942, Paris, France  
26 (5) Département de Biochimie, Hôpital Lapeyronie – CHU Montpellier - MONTPELLIER  
27 France. [am-dupuy@chu-montpellier.fr](mailto:am-dupuy@chu-montpellier.fr)  
28 (6) Laboratoire de Biochimie et Hormonologie, Hôpital Tenon, Hôpitaux Universitaires Est  
29 Parisien, Assistance Publique des Hôpitaux de Paris (AP-HP), Paris, France.  
30 [guillaume.lefevre@aphp.fr](mailto:guillaume.lefevre@aphp.fr)  
31 (7) Sorbonne Universités UPMC-University Paris06, GRC-14 BIOSFAST, Paris.  
32 (8) Service d'Accueil des Urgences, Hôpital Tenon, Hôpitaux Universitaires Est Parisien,  
33 Assistance Publique des Hôpitaux de Paris (AP-HP); Université Pierre et Marie Curie, Paris 6,  
34 Paris, France. [n.peschanski@neuf.fr](mailto:n.peschanski@neuf.fr) ; [patrick.ray@aphp.fr](mailto:patrick.ray@aphp.fr)  
35 (9) Sorbonne Universités UMPC Université Paris 06, Paris, DHU FAST (Fight Against  
36 STress).  
37  
38

39 **Correspondance:**

40 Camille Chenevier-Gobeaux, Service de Diagnostic Biologique Automatisé, Hôpital Cochin,  
41 Hôpitaux Universitaires Paris Centre, Assistance Publique des Hôpitaux de Paris (AP-HP), 27  
42 rue du Fbg St Jacques, 75679 Paris cedex 14, France. Tel : +33 1 58 41 19 16. Fax : + 33 1 58  
43 41 31 84. Mail: [camille.gobeaux@aphp.fr](mailto:camille.gobeaux@aphp.fr)  
44  
45  
46

47 **Keywords:** high sensitive cardiac troponin, chest pain, non ST-elevation acute myocardial  
48  
49 infarction, copeptin, very early presenters, chest pain onset  
50  
51  
52  
53  
54  
55  
56  
57  
58  
59  
60

## Abstract

**Objectives:** Copeptin and highly-sensitive cardiac troponin (HS-cTn) assays improve the early detection of NSTEMI. Their sensitivities may however be reduced in very early presenters.

**Setting:** We performed a post-hoc analysis of three prospective studies that included patients who presented to the Emergency Department for chest pain onset (CPO) of less than 6 hours.

**Participants:** 449 patients were included, in whom 12% had NSTEMI. CPO occurred <2h from ED presentation in 160, between 2-4h in 143, and >4h in 146 patients. The prevalence of NSTEMI was similar in all groups (9%, 13% and 12%, respectively,  $p=0.281$ ). **Measures:** Diagnostic performances of HS-cTn and copeptin at presentation were examined according to CPO <2h, 2-4h, and >4h. The discharge diagnosis was adjudicated by 2 experts, including cTnI. HS-cTn and copeptin were blindly measured. **Results:** Diagnostic accuracies of cTnI, cTnI+copeptin and HS-cTnT (but not HS-cTnT+copeptin) lower through CPO categories. For patients with CPO<2h, the choice of a threshold value of 14 ng/L for HS-cTnT resulted in 3 false negative (Sensitivity 80% [95%CI: 51-95]; specificity 85% [78-90]; 79% of correctly ruled-out patients) and that of 5 ng/L in 2 false negative (Sensitivity 87% [59-98]; specificity 58% [50-66]; 52% of correctly ruled-out patients). The addition of copeptin to HS-cTnT induced a decrease of misclassified patients to 1 in patients with CPO<2h (Sensitivity 93% [66-100]; specificity 41% [33-50]). **Conclusion:** A single measurement of HS-cTn, alone or in combination with copeptin at admission, does not allow safely ruling out NSTEMI in very early presenters (with CPO<2h). **Trial registrations:** French Health Ministry (no. DC-2009-1052), French Local Ethic comity « Comité de Protection des Personnes Ile-de-France » III (Hôpital Cochin) et VI (CHU Pitié-Salpêtrière).

**Strengths**

- Focus on very early chest pain presenters that was not performed before

**Limitations of our study**

- Small numbers of very early chest pain presenters, although the data grouping of 3 previous studies
- A single measurement of troponin at admission was considered for the analysis, but not its kinetics
- The gold standard diagnosis was based on a non-HS cTn.

## Introduction

The management of patients with acute chest pain at the Emergency Department (ED) is a major health problem and an adequate ruling out process for non-ST elevation acute myocardial infarction (NSTEMI) is crucial. Cardiac troponin (cTn) measurement with conventional assays and more recent highly-sensitive cardiac troponin assays (HS-cTn), are current diagnostic tools for the assessment of these patients (1). The European Society of Cardiology guidelines proposed a rapid rule-out strategy using low HS-cTn values (i.e. values below the Limit of Detection of the assay -LoD-) as decisional threshold for ruling out NSTEMI (1). The accuracy of a rapid 0-hour/1-hour algorithm has also been recently demonstrated in patients with CPO<6h (2) and is endorsed by the latest ESC guidelines (1). In this analysis, the authors indicated that using a single HS-cTnT cutoff value of 14 ng/L at presentation resulted in 88.7% sensitivity and 97.3% negative predictive value (NPV), but that this single assay strategy was less effective than the combination of absolute level of HS-cTnT measured at presentation and again at 1 hour, combined with the absolute difference between the two levels (2).

However, in very early presenters, such rapid and efficient triage at presentation may be uncertain (3). Indeed, very early presenters, defined as having chest pain <2h, are considered by some authors as highly vulnerable as they may not present all symptoms and signs and thus be exposed to a higher risk of misdiagnosis and therefore worse outcome (4); the application of a rapid algorithm to these patients may lead to early discharge within 3 hours from ED admission. Recently, a meta-analysis (based on eleven studies) indicated that a single HS-cTnT concentration below the limit of detection may successfully rule out AMI (5). However, concerns have been raised about the safety of a single measurement rule out protocol performed at presentation in early presenters (6,7).

1  
2  
3 Copeptin (in association with cTn) assays improve the early detection of NSTEMI (8–12).

4  
5 Indeed, a randomized controlled trial demonstrated the safety of early discharge using a single  
6  
7 combination of copeptin + cTn at presentation for patients with CPO <6h (13).

8  
9 The present study aimed to assess the diagnostic performance of HS-cTn and copeptin as a  
10  
11 single measurement at admission in very early ED presenters with suspected NSTEMI.  
12  
13  
14  
15  
16  
17  
18  
19  
20  
21  
22  
23  
24  
25  
26  
27  
28  
29  
30  
31  
32  
33  
34  
35  
36  
37  
38  
39  
40  
41  
42  
43  
44  
45  
46  
47  
48  
49  
50  
51  
52  
53  
54  
55  
56  
57  
58  
59  
60

For peer review only

## Patients and methods

### *Study design and population*

The study is a *post-hoc* analysis of three French prospective clinical studies (already published) of cardiac biomarker testing, each to explore the usefulness of copeptin and/or HS-cTnT testing in patients who presented to the ED with acute chest pain of less than 6h (14,15). However, none of these studies evaluated the influence of CPO value on diagnostic performances. All three trials had comparable inclusion/exclusion criteria and gathered similar clinical information (Table 1). Patients requiring renal replacement therapy were excluded. All studies received approval from local Institutional Review Board. The study complied with the principles of the Declaration of Helsinki. Recommendations of the Standards for Reporting of Diagnostic Accuracy (STARD) initiative were applied (16).

### *Patient Involvement*

The development of the research question was not informed by patients. Patients were not involved in the design of this study. Patients were not involved in the recruitment to and conduct of the study. There was no results dissemination to study participants.

### *Routine assessment*

All patients underwent an initial clinical evaluation (including clinical history, physical examination, 12-lead ECG, pulse oximetry, routine blood tests, and chest X-ray). Conventional cardiac Troponin I (cTnI) was measured on a venous blood collection performed at presentation and, if required, repeated after 3 to 9 h, as clinically indicated (17). The onset of chest pain (CPO), defined as the delay from symptom onset to presentation was recorded, based on patient history/declaration. When history was incomplete or inconsistent, CPO was not recorded and patient was excluded of the analysis (see flow chart, Figure 1).



1  
2  
3 Based on all clinical, biological (including cTnI value, but not HS-cTnT and copeptin values  
4 which were blindly measured) and imaging results, a decision was made by the attending  
5 physician to admit or discharge the patient, as well as medical therapy and revascularization if  
6 indicated. Attending emergency physicians and cardiologists were blinded to the results of  
7 HS-cTnT and copeptin, and biologists were blinded to the suspected diagnosis at presentation.  
8  
9 Patients with no cTnI results and/or no recorded CPO value, and patients with a final  
10 diagnosis of STEMI, were excluded (see flowchart, Figure 1).  
11  
12  
13  
14  
15  
16  
17  
18  
19

### 20 ***Gold standard diagnosis***

21  
22 The gold standard diagnosis was adjudicated by two independent experts (emergency  
23 physician and cardiologist) who reviewed all available medical records (including patient  
24 history, physical findings, laboratory results including cTnI value and radiologic testing, ECG,  
25 echocardiography, cardiac exercise test, coronary angiography, summary chart at discharge)  
26 pertaining to the patient from the time of ED presentation to 30-day follow-up. Experts were  
27 blind to copeptin and HS-cTnT results. In the event of diagnostic disagreement, cases were  
28 reviewed and adjudicated in conjunction with a third expert.  
29  
30  
31  
32  
33  
34  
35  
36

37 AMI was diagnosed according to the universal definition (18). Patients with a cTnI increase  
38 (or a rise/fall pattern) above the 10%CV threshold, associated with at least one of the  
39 following: symptoms of myocardial ischemia, new ST-T changes or new Q wave on ECG,  
40 imaging of new loss of viable myocardium, or normal cTnI on admission were classified as  
41 having an MI (STEMI with a ST elevation in at least 2 continuous leads on ECG or new onset  
42 of left bundle branch block, or NSTEMI). STEMI patients were excluded from the analysis,  
43 based on ST elevation observed on the ECG (see Flow chart, Fig. 1). Patients were classified  
44 according to the CPO, <2h, from 2-4h and >4h; those with a CPO <2 hours were considered  
45 as very early presenters.  
46  
47  
48  
49  
50  
51  
52  
53  
54  
55  
56  
57  
58  
59  
60

1  
2  
3 Unstable angina (UA) diagnosis was adjudicated in patients with history or clinical symptoms  
4 consistent with ACS but without ST-T changes on the ECG and without change of cTn on  
5 serial testing. Other diagnostic categories beside NSTEMI and UA were non-ACS (e.g., stable  
6 angina, myocarditis, arrhythmias, heart failure, pulmonary embolism, and chest pain of  
7 unknown origin). UA and non-ACS chest pain were considered as non-NSTEMI in our  
8 analysis.  
9  
10  
11  
12  
13  
14  
15

### 16 17 18 ***Troponin measurements***

19  
20 Plasma cTnI concentrations were routinely measured on an X-pand® HM analyzer, using the  
21 Cardiac Troponin-I immunoassay (Siemens Healthcare Diagnostics Inc., Newark, CT) in two  
22 EDs (Cochin and La Pitié Salpêtrière Hospitals). The limit of quantitation (LoQ (or 10%CV),  
23 i.e. the lowest cTn concentration that can be reproducibly measured with a between-run CV of  
24 ≤10%) was 0.14 µg/L. In Bicêtre and in Montpellier hospitals, plasma cTnI concentrations  
25 were routinely measured on an Access® analyser (Beckman Coulter, Inc., Brea, CA).  
26 According to the manufacturer's data the LoQ was 0.04 µg/L. After routine cTnI  
27 measurement, plasma samples were aliquoted and frozen (-40°C) until HS-cTnT and copeptin  
28 measurement.  
29  
30  
31  
32  
33  
34  
35  
36  
37  
38

39 Hs-cTnT was measured in heparinized collected samples, on an Elecsys2010® analyser  
40 (Roche Diagnostics, Meylan, France). The LoD is 5 ng/L, and the 99<sup>th</sup> percentile is 14 ng/L.  
41 HS-cTnT determinations were performed blinded to the clinical assessment of the emergency  
42 physicians. Of note, the LoD is measured with a between-run CV of >10%, while the 99<sup>th</sup>  
43 percentile is a precise concentration (CV<10%) (7). HS-cTnT determinations were performed  
44 blinded to the clinical assessment of the emergency physicians  
45  
46  
47  
48  
49  
50  
51  
52  
53

### 54 55 ***Copeptin measurement***

1  
2  
3 Copeptin was measured in heparinized blood samples collected on admission. The assay was  
4  
5 performed on a KRYPTOR® analyser using ThermoFisher Scientific sandwich  
6  
7 immunoluminometric assay (B.R.A.H.M.S Copeptin KRYPTOR, B.R.A.H.M.S  
8  
9 Aktiengesellschaft, Hennigsdorf, Germany). The assay principle is based on TRACE  
10  
11 technology (Time-Resolved Amplified Cryptate Emission). The lower detection limit is 4.8  
12  
13 pmol/L, and the functional assay sensitivity (20%CV value) is <12 pmol/L (data from  
14  
15 manufacturer, recommended threshold value for this method). Copeptin determinations were  
16  
17 performed blinded to the clinical assessment of the emergency physicians.  
18  
19  
20  
21

### 22 ***Statistical analysis***

23  
24 Continuous variables are presented as means  $\pm$  SD, and categorical variables are expressed as  
25  
26 numbers (percentage). Continuous variables were compared by using the Kruskal-Wallis test,  
27  
28 and categorical variables were assessed using Pearson's  $\chi^2$  test. Number of misclassified  
29  
30 patients and number of correctly ruled-out patients were collected for each threshold strategy,  
31  
32 and correspond to the false negative and the true positive patients, respectively.  
33  
34

35 Receiver operating characteristic (ROC) curves were constructed to assess the sensitivity and  
36  
37 specificity, positive predictive value (PPV) and negative predictive value (NPV) throughout  
38  
39 the concentrations of cTnI, HS-cTnT and copeptin for the diagnosis of NSTEMI, and  
40  
41 according to the CPO. cTn and copeptin values were log-transformed before combination for  
42  
43 ROC analysis. All data are presented with their 95% confidence intervals [95%CI]. All  
44  
45 hypothesis testing was two-tailed, and  $p < 0.05$  was considered statistically significant.  
46  
47 Statistical analysis was performed using MedCalc (MedCalc Software, Version 12.4.0.0,  
48  
49 Mariakerke, Belgium).  
50  
51  
52  
53  
54  
55  
56  
57  
58  
59  
60

## Results

### *Characteristics of the studied population*

Table 2 shows the characteristics of the studied population. Briefly, in the total cohort mean age was  $58 \pm 17$  years, and included more males. A gold standard diagnosis of NSTEMI was adjudicated in 55 patients (12%). Delay from chest pain onset to ED admission was  $<2$  hours in 160 (36%) patients, was from 2 to 4 hours in 143 (32%) and was  $>4$  hours (and below 6 hours) in 146 (32%) patients. Very early presenters with NSTEMI ( $n=15$ ) tended to be older than those without NSTEMI ( $n=145$ ) (65 vs. 55 years-old), were more frequently hospitalized (93% vs. 58%), and also more frequently underwent diagnostic coronary angiography (73% vs. 27%).

### *Diagnostic performances according to CPO*

Diagnostic accuracies of cTnI, cTnI+coopeptin and HS-cTnT lower through CPO categories, as indicated by estimated AUCs and their 95%CI intervals (Table 3). The AUCs of HS-cTnT+coopeptin were not different through the CPO categories.

Diagnostic performances of both cTn, alone or in combination with coopeptin, and using different decisional thresholds, are presented in Table 4. The subsequent potential misclassified patients are detailed in Online supplemental Table 5.

In very early presenters (CPO  $<2$  hours), a single value of cTnI alone had low sensitivity (73 [73-91]%) but high specificity (97 [92-99]%), and misclassified 4 of 15 NSTEMI patients. However, this strategy could correctly rule-out 141 patients (88%). Combining coopeptin with cTnI increases sensitivity, and lowers the number of misdiagnosed patients from 4 to 2, but significantly lowers the rate of ruled-out patients from 88% to 54% (Table 4). Of note, addition of coopeptin also significantly lowered specificity. At a threshold of 14 ng/L, HS-cTnT had low sensitivity (80 [59-98]%), misclassified 3 NSTEMI patients but could correctly

1  
2  
3 rule-out 123 (79%) patients, which is less than using cTnI. The sensitivity of HS-TnT alone is  
4 likely to be suboptimal in early presenters, but can be improved by using a lower threshold for  
5 positivity or adding copeptin (but this is accompanied with a marked loss of specificity). The  
6 addition of copeptin induced a decrease in misclassified patients from 2 to 1, either with an  
7 HS-cTnT threshold at 14 or at 5 ng/L. This ultimate misdiagnosed NSTEMI patient with CPO  
8 <2h who presented with all undetectable biomarkers was a 44-years old woman with a history  
9 of smoking and no CV risk factors; the CPO was 45 min before hospital admission (Table 5).  
10  
11 In patients with CPO 2-4 hours, results are similar to those observed in very early presenters,  
12 although the number of misclassified patients was different (Table 4). Adding copeptin to  
13 cTnI induced a decrease of misclassified patients from 5 to 1 for an HS-cTnT threshold at 14  
14 ng/L, and from 2 to 0 for an HS-cTnT threshold at 5 ng/L. In particular, combining copeptin  
15 to the LoD of HS-cTnT reached 100% sensitivity of the test. Indeed, all NSTEMI patients  
16 with CPO 2-4 h had a detectable HS-cTnT and/or an elevated copeptin. In this sub-group  
17 again, the use of copeptin lowered significantly the specificity of the test.  
18  
19 As expected, in patients with CPO >4 hours, all patients had quantitative cTnI and detectable  
20 HS-cTnT. No patient was misclassified. The addition of copeptin in this sub-group had no  
21 effect on sensitivity or misclassified patients.  
22  
23  
24  
25  
26  
27  
28  
29  
30  
31  
32  
33  
34  
35  
36  
37  
38  
39  
40  
41

### 42 ***Potential misdiagnosed NSTEMI***

43  
44 Characteristics of potential misdiagnosed NSTEMI patients are detailed in Table 5. All  
45 potentially missed NSTEMI in the very early presenters population had a CPO <1 hour. We  
46 found no distinguishing characteristics in misclassified patients when comparing to correctly  
47 diagnosed patients in terms of age, sex, and cardiovascular risks, in each CPO category. Of  
48 note, when STEMI patients were included in our analysis, results were comparable (data not  
49 shown).  
50  
51  
52  
53  
54  
55  
56  
57  
58  
59  
60

## Discussion

Our results indicate that diagnostic performances of HS-cTnT values at admission, alone or combined with copeptin, are reduced in the subgroup of patients with shorter CPO. Emergency physicians should not rule out NSTEMI in very early presenters with a single low value of HS-cTnT and/or copeptin at presentation.

Our studied population included one third of early presenters, and this proportion is similar to that found by Boeddinghaus et al (26% of patients presented within 2h from CPO) (4), by Keller et al (37% and 38% of patients with CPO<3h, (8,19)), and by Reichlin et al. (222 patients with CPO<3h out of 718, i.e. 31%) (20). More recently, Stallone et al reported 519 (26%) patients that arrived within 2 hours of symptom onset to the ED (6). This may reflect that our study was performed in large urban areas equipped with pre-hospital emergency ambulances. A more prolonged delay might be expected in more rural regions. The exact definition of very early presenters is still a matter of debate. Authors nevertheless agree to define them as presenting before 2h (20). Very few studies examined the specific groups of early/very early presenters (4,6,8,20). In the ESC guidelines, a different strategy is recommended for patients with versus without CPO<6h but not for earlier presenters (1). We believe that this proportion is not negligible and the impact of this very early population might be underestimated in studies where the CPO is not evaluated.

We observed that AUCs of cTnI, cTnI+copeptin and HS-cTnT were significantly lower when CPO<4h. The NPVs were not significantly impacted by the CPO, but a suboptimal sensitivity and a non-negligible proportion of misclassified NSTEMI was observed in patients with CPO<2h for all tested thresholds and combinations, even if cTnI and HS-cTnT performances can be improved by using a lower threshold for positivity or adding copeptin. The same was true for patients with CPO 2-4h, except when using the combination of HS-cTnT<5 ng/L and copeptin <12 µmol/L. We reported the number of misclassified patients in addition to

1  
2  
3 sensitivity and NPV, because NPV is known to be dependent of the prevalence, thus its value  
4 might be biased. The absolute number of misdiagnosed patients might be more clinically  
5 pertinent than NPV (21).  
6  
7

8  
9 As previously suggested (1), we found that sensitivity and NPV of a single measurement of  
10 HS-cTn at admission is not enough to safely excluded a NSTEMI in very early presenters. We  
11 here show that lowering HS-cTn decisional threshold to LoD is not sufficient to detect all  
12 NSTEMI among very early chest pain presenters. Although combining copeptin to HS-cTnT  
13 increased sensitivity and lowered number of misclassified patients, none of the tested  
14 strategies allowed for identification of all NSTEMI. Results obtained in very early presenters  
15 were very similar to patients with CPO 2-4h, except that in this later sub-group combining  
16 copeptin with HS-cTnT succeeded in significantly increasing sensitivity (all NSTEMI patients  
17 had a detectable HS-cTnT and/or an elevated copeptin).  
18  
19

20  
21 Our results can be compared to those of Boeddinghaus et al. who found that sensitivity of a  
22 single HS-cTn measurement is lower in very early presenters, in comparison to all patients (4).  
23 These authors indicated that using a single cut-off approach, 61% of the very early presenters  
24 were ruled-out, which resulted in a sensitivity of 94% and a NPV of 98%. However, the  
25 authors did not evaluate the impact of copeptin across CPO categories. In another study, the  
26 same authors indicated that the additional use of copeptin did not sufficiently improve  
27 diagnostic accuracy in early presenters (22). Here again, our results are in accordance with  
28 those of Boeddinghaus indicating that copeptin did not improve diagnostic accuracy of hs-  
29 cTnI at presentation in early presenters (22). Mueller et al showed, using the rapid 0-hour/1-  
30 hour algorithm that 63% patients with CPO<6h were classified as rule-out. However, 7  
31 patients were missed (0.9% rate), in whom 3 had HS-cTnT<LoD at presentation and at 1 hour  
32 (2). Moreover, a single cutoff value for HS-cTnT at 14 ng/L at presentation resulted in a  
33 sensitivity of 88.7% and a NPV of 97.3%, and performed less adequately than the  
34  
35  
36  
37  
38  
39  
40  
41  
42  
43  
44  
45  
46  
47  
48  
49  
50  
51  
52  
53  
54  
55  
56  
57  
58  
59  
60

1  
2  
3 combination of HS-cTnT at presentation with 1-hour level and 1-hour absolute change (2). In  
4  
5 a more recent study, Mokhtari et al. evaluated a rapid 0H/1H protocol for discharge chest pain  
6  
7 patients based on a single value  $< \text{LoD}$  at admission (23). These authors found 2 missed  
8  
9 patients in their population, and recognize that the safety of such rapid protocol is not clear in  
10  
11 very early presenters. They further recommend additional HS-cTnT testing at 3 hours for very  
12  
13 early presenters (23).  
14

15  
16 Performance of cardiac troponins, although measured using HS assays, might be limited in  
17  
18 very early presenters because of their kinetics of release into the blood circulation (8). The  
19  
20 release of cTn into the circulation following cardiomyocyte damage is a time-dependent  
21  
22 phenomenon (24), and a single measurement approach may fail at identifying AMI very early  
23  
24 after the onset of symptoms (25). Indeed we, like other authors, found very early presenters  
25  
26 with undetectable HS-cTnT at admission. Time-dependent release of copeptin during AMI  
27  
28 has been described earlier, and this biomarker has been considered as an early biomarker (8).  
29  
30 Copeptin increases immediately after induction of ischemia, and peaks 90 min after (26).  
31  
32 However, some authors recently indicated that copeptin kinetics might be different in  
33  
34 NSTEMI in comparison to STEMI, and that if copeptin is increased at first medical contact in  
35  
36 the ambulance, the circulating concentrations may rapidly decrease down to normal ranges at  
37  
38 the time of hospital admission (27). Our results are in accordance with this observation, as we  
39  
40 found one misdiagnosed NSTEMI very early presenter with non-elevated copeptin.  
41  
42

43  
44 Lastly, our results are reinforced by those of Stallone et al who found that the additional use  
45  
46 of copeptin did not increase diagnostic accuracy in very early presenters (6). Furthermore, the  
47  
48 NPV for the combination of HS-cTnT and copeptin was lower in patients arriving in the first  
49  
50 2 hours than in those arriving after 2 hours (6). However, these authors did not evaluate the  
51  
52 LoD of HS-cTnT in their work. We here report that even when lowering the cutoff of HS-  
53  
54  
55  
56  
57  
58  
59  
60



1  
2  
3 cTnT, the combination of HS-cTnT and copeptin is not enough to detect all NSTEMI among  
4  
5 all very early presenters.

6  
7 Of note, all patients with CPO >4 hours had detectable cTnI and HS-cTnT, i.e. the use of  
8  
9 copeptin in this situation added no gain. Other studies reported that copeptin testing for the  
10  
11 rule out of NSTEMI should be limited to CPO < 6 hours (1,13). According to our data, the  
12  
13 added value of copeptin might be more restricted, but further studies are needed to confirm  
14  
15 our findings.  
16

### 17 18 19 20 **Limitations of our study**

21  
22 First, it is a post-hoc analysis of three previously published studies, and some data are missing  
23  
24 (vital signs at admission, details in ECG findings for example). Second, only a single  
25  
26 measurement of troponin at admission was considered for this analysis, and we did not  
27  
28 evaluate its kinetics; we therefore cannot comment on the accuracy of the recent 1h algorithm  
29  
30 in our population (1,2). Third, different troponin assays were used across the different centers  
31  
32 (11–13). However, all centers evaluated the same HS-cTnT and copeptin. Fourth, as the gold  
33  
34 standard diagnosis was based on a non-HS cTn, we recognize that this could result in  
35  
36 underdiagnosis of myocardial injury; however, our results are comparable to those of Stallone  
37  
38 et al how recently used an HS-cTn, as suggested by our AUC (0.85[95%CI : 0.79-0.90]) in  
39  
40 comparison to those of Stallone (0.86 [95%CI:0.82-.090]) (6). And the message on time-  
41  
42 effect is not altered. Fifth, we examined 3 subgroups with CPO <2h, 2-4h and 4h and defined  
43  
44 very early presenters as those having CPO <2 hours, as based on the accepted definition of  
45  
46 early presenters (20). However, very early presenters represent more than one third of the  
47  
48 studied population, highlighting the specific need for further studies to confirm our findings.  
49  
50  
51  
52  
53  
54  
55  
56  
57  
58  
59  
60

## Conclusion

A single measurement of HS-cTnT alone or in combination with copeptin at admission seems not sensitive enough to safely rule out NSTEMI in very early presenters (chest pain onset < 2 hours from ED admission). If other studies confirm our findings, another strategy to safely exclude NSTEMI in this specific population that represents one third of chest pain patients is warranted.

## Acknowledgments

The authors would like to thank again the nursing, technical and medical staff at the emergency departments and biochemistry laboratories for their assistance throughout the original studies.

Reagents for the Kryptor<sup>®</sup> Compact Plus and HS-cTnT assays used for the 3 studies were kindly provided by ThermoFisher Scientific and Roche Diagnostic, France, respectively.

## Figure legends:

**Figure 1:** Flow chart of the studied population.

**Figure 2:** ROC curves of cTn for the diagnosis of NSTEMI, alone or in combination with copeptin. A, CPO<2h; B, CPO 2-4h; C. CPO >4h.

## Contributorship statement:

PR, CM, MS, and NP contributed to the design and inclusions. CCG, SL, AMD and GL realized sample collections and biomarker measurements. CCG and PR realized statistical

1  
2  
3 analysis. All authors approved the final manuscript. ThermoFisher Scientific and Roche  
4  
5 Diagnostic provided reagents.  
6  
7  
8  
9

10  
11 **Competing interests:**  
12

13 CCG, PR and CM received honorarias and lecture fees from Roche Diagnostics and  
14  
15 Thermofisher Scientific.  
16  
17  
18  
19  
20  
21

22 **Funding:**  
23

24 None  
25  
26  
27  
28  
29  
30

31 **Data sharing statement:**  
32

33 No data sharing  
34  
35  
36  
37  
38  
39  
40  
41  
42  
43  
44  
45  
46  
47  
48  
49  
50  
51  
52  
53  
54  
55  
56  
57  
58  
59  
60

## References

1. Roffi M, Patrono C, Collet J-P, Mueller C, Valgimigli M, Andreotti F, et al. 2015 ESC Guidelines for the management of acute coronary syndromes in patients presenting without persistent ST-segment elevation: Task Force for the Management of Acute Coronary Syndromes in Patients Presenting without Persistent ST-Segment Elevation of the European Society of Cardiology (ESC). *Eur Heart J*. 14 janv 2016;37(3):267-315.
2. Mueller C, Giannitsis E, Christ M, Ordóñez-Llanos J, deFilippi C, McCord J, et al. Multicenter Evaluation of a 0-Hour/1-Hour Algorithm in the Diagnosis of Myocardial Infarction With High-Sensitivity Cardiac Troponin T. *Ann Emerg Med*. juill 2016;68(1):76-87.e4.
3. Wildi K, Nelles B, Twerenbold R, Rubini Giménez M, Reichlin T, Singeisen H, et al. Safety and efficacy of the 0 h/3 h protocol for rapid rule out of myocardial infarction. *Am Heart J*. nov 2016;181:16-25.
4. Boeddinghaus J, Nestelberger T, Twerenbold R, Wildi K, Badertscher P, Cupa J, et al. Direct Comparison of Four Very Early Rule-Out Strategies for Acute Myocardial Infarction Using High-Sensitivity Cardiac Troponin I. *Circulation*. 10 mars 2017;
5. Pickering JW, Than MP, Cullen L, Aldous S, Ter Avest E, Body R, et al. Rapid Rule-out of Acute Myocardial Infarction With a Single High-Sensitivity Cardiac Troponin T Measurement Below the Limit of Detection: A Collaborative Meta-analysis. *Ann Intern Med*. 18 avr 2017;
6. Stallone F, Schoenenberger AW, Puelacher C, Rubini Gimenez M, Walz B, Naduvilekoot Devasia A, et al. Incremental value of copeptin in suspected acute myocardial infarction very early after symptom onset. *Eur Heart J Acute Cardiovasc Care*. sept 2016;5(5):407-15.

- 1  
2  
3 7. Chenevier-Gobeaux C, Lefevre G, Bonnefoy-Cudraz E, Charpentier S, Dehoux M,  
4 Meune C, et al. Why a new algorithm using high-sensitivity cardiac troponins for the rapid  
5 rule-out of NSTEMI is not adapted to routine practice. *Clin Chem Lab Med*. 1 oct  
6 2016;54(10):e279-280.  
7
- 8  
9  
10  
11 8. Keller T, Tzikas S, Zeller T, Czyz E, Lillpopp L, Ojeda FM, et al. Copeptin improves  
12 early diagnosis of acute myocardial infarction. *J Am Coll Cardiol*. 11 mai 2010;55(19):2096-  
13 106.  
14
- 15  
16  
17  
18 9. Reichlin T, Hochholzer W, Stelzig C, Laule K, Freidank H, Morgenthaler NG, et al.  
19 Incremental value of copeptin for rapid rule out of acute myocardial infarction. *J Am Coll*  
20 *Cardiol*. 30 juin 2009;54(1):60-8.  
21
- 22  
23  
24  
25 10. Lipinski MJ, Escárcega RO, D'Ascenzo F, Magalhães MA, Baker NC, Torguson R, et  
26 al. A systematic review and collaborative meta-analysis to determine the incremental value of  
27 copeptin for rapid rule-out of acute myocardial infarction. *Am J Cardiol*. 1 mai  
28 2014;113(9):1581-91.  
29
- 30  
31  
32  
33 11. Raskovalova T, Twerenbold R, Collinson PO, Keller T, Bouvaist H, Folli C, et al.  
34 Diagnostic accuracy of combined cardiac troponin and copeptin assessment for early rule-out  
35 of myocardial infarction: a systematic review and meta-analysis. *Eur Heart J Acute*  
36 *Cardiovasc Care*. mars 2014;3(1):18-27.  
37
- 38  
39  
40  
41 12. Chenevier-Gobeaux C, Freund Y, Claessens Y-E, Guérin S, Bonnet P, Doumenc B, et  
42 al. Copeptin for rapid rule out of acute myocardial infarction in emergency department. *Int J*  
43 *Cardiol*. 5 juin 2013;166(1):198-204.  
44
- 45  
46  
47  
48 13. Möckel M, Searle J, Hamm C, Slagman A, Blankenberg S, Huber K, et al. Early  
49 discharge using single cardiac troponin and copeptin testing in patients with suspected acute  
50 coronary syndrome (ACS): a randomized, controlled clinical process study. *Eur Heart J*. 7  
51 févr 2015;36(6):369-76.  
52  
53  
54  
55  
56  
57  
58  
59  
60

- 1  
2  
3 14. Sebbane M, Lefebvre S, Kuster N, Jreige R, Jacques E, Badiou S, et al. Early rule out  
4 of acute myocardial infarction in ED patients: value of combined high-sensitivity cardiac  
5 troponin T and ultrasensitive copeptin assays at admission. *Am J Emerg Med.* sept  
6 2013;31(9):1302-8.  
7
- 8  
9  
10  
11 15. Chenevier-Gobeaux C, Meune C, Lefevre G, Doumenc B, Sorbets E, Peschanski N, et  
12 al. A single value of high-sensitive troponin T below the limit of detection is not enough for  
13 ruling out non ST elevation myocardial infarction in the emergency department. *Clin*  
14 *Biochem.* oct 2016;49(15):1113-7.  
15
- 16  
17  
18  
19  
20 16. Bossuyt PM, Reitsma JB, Bruns DE, Gatsonis CA, Glasziou PP, Irwig LM, et al. The  
21 STARD statement for reporting studies of diagnostic accuracy: explanation and elaboration.  
22 *Ann Intern Med.* 7 janv 2003;138(1):W1-12.  
23
- 24  
25  
26  
27 17. Hamm CW, Bassand J-P, Agewall S, Bax J, Boersma E, Bueno H, et al. ESC  
28 Guidelines for the management of acute coronary syndromes in patients presenting without  
29 persistent ST-segment elevation: The Task Force for the management of acute coronary  
30 syndromes (ACS) in patients presenting without persistent ST-segment elevation of the  
31 European Society of Cardiology (ESC). *Eur Heart J.* déc 2011;32(23):2999-3054.  
32
- 33  
34  
35  
36  
37 18. Thygesen K, Alpert JS, Jaffe AS, Simoons ML, Chaitman BR, White HD, et al. Third  
38 universal definition of myocardial infarction. *Circulation.* 16 oct 2012;126(16):2020-35.  
39
- 40  
41  
42 19. Keller T, Zeller T, Ojeda F, Tzikas S, Lillpopf L, Sinning C, et al. Serial changes in  
43 highly sensitive troponin I assay and early diagnosis of myocardial infarction. *JAMA.* 28 déc  
44 2011;306(24):2684-93.  
45
- 46  
47  
48 20. Reichlin T, Hochholzer W, Bassetti S, Steuer S, Stelzig C, Hartwiger S, et al. Early  
49 diagnosis of myocardial infarction with sensitive cardiac troponin assays. *N Engl J Med.* 27  
50 août 2009;361(9):858-67.  
51  
52  
53  
54  
55  
56  
57  
58  
59  
60

- 1  
2  
3 21. Righini M, Aujesky D, Roy P-M, Cornuz J, de Moerloose P, Bounameaux H, et al.  
4  
5 Clinical usefulness of D-dimer depending on clinical probability and cutoff value in  
6  
7 outpatients with suspected pulmonary embolism. *Arch Intern Med*. 13 déc  
8  
9 2004;164(22):2483-7.  
10  
11 22. Boeddinghaus J, Reichlin T, Nestelberger T, Twerenbold R, Meili Y, Wildi K, et al.  
12  
13 Early diagnosis of acute myocardial infarction in patients with mild elevations of cardiac  
14  
15 troponin. *Clin Res Cardiol Off J Ger Card Soc*. 1 févr 2017;  
16  
17 23. Mokhtari A, Lindahl B, Schiopu A, Yndigegn T, Khoshnood A, Gilje P, et al. A 0h/1h  
18  
19 protocol for safe early discharge of chest pain patients. *Acad Emerg Med Off J Soc Acad*  
20  
21 *Emerg Med*. 13 mai 2017;  
22  
23 24. White HD. Pathobiology of troponin elevations: do elevations occur with myocardial  
24  
25 ischemia as well as necrosis? *J Am Coll Cardiol*. 14 juin 2011;57(24):2406-8.  
26  
27 25. Korley FK. The Wait for High-Sensitivity Troponin Is Over-Proceed Cautiously.  
28  
29 *JAMA Cardiol*. 13 déc 2017;  
30  
31 26. Gu YL, Voors AA, Zijlstra F, Hillege HL, Struck J, Masson S, et al. Comparison of  
32  
33 the temporal release pattern of copeptin with conventional biomarkers in acute myocardial  
34  
35 infarction. *Clin Res Cardiol Off J Ger Card Soc*. déc 2011;100(12):1069-76.  
36  
37 27. Slagman A, Searle J, Müller C, Möckel M. Temporal release pattern of copeptin and  
38  
39 troponin T in patients with suspected acute coronary syndrome and spontaneous acute  
40  
41 myocardial infarction. *Clin Chem*. oct 2015;61(10):1273-82.  
42  
43  
44  
45  
46  
47  
48  
49  
50  
51  
52  
53  
54  
55  
56  
57  
58  
59  
60

**Table 1:** Main characteristics of original study designs

|                                    | <b>Sebbane et al. (14)</b>                                                 | <b>Chenevier-Gobeaux et al. (15)</b>                                                                                              |
|------------------------------------|----------------------------------------------------------------------------|-----------------------------------------------------------------------------------------------------------------------------------|
| <b>Inclusion Criteria</b>          | Prospective cohort of ED patients with CPO <12h                            | Consecutive patients, >18 years old, admitted to the ED or to the ICU by pre-hospital emergency ambulances                        |
| <b>Exclusion criteria</b>          | Patients with traumatic causes of chest pain                               | Patients <18 years old<br>Acute or chronic renal failure requiring dialysis                                                       |
| <b>Plasma sampling and storage</b> | Heparinized and EDTA blood collection. Storage at -80°C for later analysis | Heparinized blood collection after routine cTnI measurement. Storage at -40°C until HS-cTnT and copeptin measurement              |
| <b>Registration number/name</b>    | French Health Ministry (no. DC-2009-1052)                                  | French Local Ethic comity « Comité de Protection des Personnes Ile-de-France » III (Hôpital Cochin) et VI (CHU Pitié-Salpêtrière) |
| <b>Consent</b>                     | Written informed consent                                                   | Cochin Hospital: waiver of informed consent was authorized. Pitié-Salpêtrière Hospital: informed consent was granted.             |



**Table 2:** Main Characteristics of the studied population

|                              | <b>All patients</b> | <b>CPO &lt;2h<br/>(very early<br/>presenters)</b> | <b>CPO2-4h</b> | <b>CPO 4-6h</b> |
|------------------------------|---------------------|---------------------------------------------------|----------------|-----------------|
| <b>n</b>                     | 449                 | 160                                               | 143            | 146             |
| <b>Age (years)</b>           | 58 ± 17             | 57 ± 16                                           | 59 ± 17        | 58 ± 17         |
| <b>Men</b>                   | 281 (63)            | 101 (63)                                          | 96 (67)        | 84 (58)         |
| <b>Past medical history:</b> |                     |                                                   |                |                 |
| Familial history of          | 104/301 (35)        | 63/147 (43)                                       | 26/90 (29)     | 15/64 (23)      |
| CAD, present/total (%) *     | 120 (27)            | 38 (24)                                           | 42 (29)        | 40 (27)         |
| Personal history of          |                     |                                                   |                |                 |
| CAD                          | 168 (37)            | 61 (38)                                           | 57 (40)        | 50 (34)         |
| Dyslipidaemia                | 67 (15)             | 20 (13)                                           | 22 (15)        | 25 (17)         |
| Diabetes                     | 176 (39)            | 72 (45)                                           | 51 (37)        | 53 (36)         |
| Smoking                      | 158 (35)            | 52 (33)                                           | 58 (41)        | 48 (33)         |
| Hypertension                 |                     |                                                   |                |                 |
| <b>Outcome:</b>              |                     |                                                   |                |                 |
| Coronary angiography         | 131 (29)            | 49 (31)                                           | 46 (32)        | 36 (25)         |
| Admission                    | 256 (57)            | 98 (61)                                           | 91 (63)        | 67 (46)         |
| <b>Final Diagnostic:</b>     |                     |                                                   |                |                 |
| NSTEMI                       | 55 (12)             | 15 (9)                                            | 22 (13)        | 18 (12)         |
| other                        | 394 (88)            | 145 (91)                                          | 121 (85)       | 128 (88)        |

*CAD, coronary artery disease; CPO, chest pain onset; NSTEMI, non ST-elevation myocardial infarction.*

*Results are expressed in mean ± SD or in number (percentage)*

*\*, missing data exist for this variable.*

**Table 3:** AUC values according to CPO category

|                                       | <b>Biomarker</b>   | AUC   | 95% CI         |
|---------------------------------------|--------------------|-------|----------------|
| CPO <2h<br>(very early<br>presenters) | cTnI               | 0.815 | 0.746 to 0.872 |
|                                       | cTnI + copeptin    | 0.866 | 0.804 to 0.915 |
|                                       | HS-cTnT            | 0.853 | 0.789 to 0.904 |
|                                       | HS-cTnT + copeptin | 0.897 | 0.840 to 0.940 |
| CPO 2-4h                              | cTnI               | 0.856 | 0.788 to 0.909 |
|                                       | cTnI + copeptin    | 0.906 | 0.846 to 0.948 |
|                                       | HS-cTnT            | 0.869 | 0.802 to 0.919 |
|                                       | HS-cTnT + copeptin | 0.891 | 0.829 to 0.937 |
| CPO >4h                               | cTnI               | 0.989 | 0.955 to 0.999 |
|                                       | cTnI + copeptin    | 0.978 | 0.939 to 0.995 |
|                                       | HS-cTnT            | 0.980 | 0.942 to 0.996 |
|                                       | HS-cTnT + copeptin | 0.953 | 0.905 to 0.981 |

AUC, area under the ROC curve; CPO, chest pain onset

**Table 4:** Diagnostic performances for NSTEMI according to onset chest pain

| CPO                                                 | Biomarker        | Threshold             | Sensitivity (%) | Specificity (%) | Negative predictive value (%) | Positive predictive value (%) | Misdiagnosed (**) (n) | Correctly ruled-out, n (%) |
|-----------------------------------------------------|------------------|-----------------------|-----------------|-----------------|-------------------------------|-------------------------------|-----------------------|----------------------------|
| <b>&lt;2h</b><br>(very early presenters)<br>(n=160) | cTnI             | LoQ (*)               | 73 [45-91]      | 97 [92-99]      | 97 [92-99]                    | 73 [45-91]                    | 4                     | 141 (88)                   |
|                                                     | cTnI + copeptin  | LoQ (*) and 12 pmol/L | 87 [59-98]      | 60 [52-68] ε    | 98 [92-100]                   | 18 [7-24]                     | 2                     | 87 (54) ε                  |
|                                                     | HScTnT           | 14 ng/L               | 80 [51-95]      | 85 [78-90] ε    | 98 [93-100]                   | 35 [20-53]                    | 3                     | 123 (79) ε                 |
|                                                     | HS-cTnT+copeptin | 5 ng/L                | 87 [59-98]      | 58 [50-66] ε ζ  | 98 [92-100]                   | 18 [10-29]                    | 2                     | 84 (52) ε                  |
|                                                     |                  | 14 ng/L and 12 pmol/L | 93 [66-100]     | 54 [46-62] ε ζ  | 99 [93-100]                   | 18 [10-29]                    | 1                     | 79 (49) ε                  |
| <b>2-4h</b><br>(n=143)                              | cTnI             | LoQ (*)               | 73 [50-89]      | 95 [89-98]      | 95 [89-98] ψ                  | 73 [50-89]                    | 6                     | 115 (80)                   |
|                                                     | cTnI + copeptin  | LoQ (*) and 12 pmol/L | 95 [75-100]     | 57 [48-66] ε    | 99 [92-100]                   | 29 [19-41]                    | 1                     | 69 (48) ε                  |
|                                                     | HScTnT           | 14 ng/L               | 77 [54-91]      | 79 [71-86] ε    | 95 [88-98] ψ                  | 40 [26-56]                    | 5                     | 96 (67) ε μ                |
|                                                     |                  | 5 ng/L                | 91 [70-98]      | 55 [46-64] ε ζ  | 97 [89-100]                   | 27 [18-39]                    | 2                     | 67 (47) ε                  |
|                                                     | HS-cTnT+copeptin | 14 ng/L and 12 pmol/L | 95 [75-100]     | 50 [41-59] ε ζ  | 99 [91-100]                   | 25 [17-36]                    | 1                     | 58 (41) ε                  |
| 5 ng/L and 12 pmol/L                                |                  | 100 [82-100]          | 35 [27-44] ε ζ  | 100 [90-100]    | 22 [15-32]                    | 0                             | 42 (29) ε             |                            |
| <b>&gt;4h</b><br>(n=146)                            | cTnI             | LoQ (*)               | 100 [77-100]    | 96 [91-99]      | 100 [96-100]                  | 77 [54-91]                    | 0                     | 122 (85)                   |
|                                                     | cTnI + copeptin  | LoQ (*) and 12 pmol/L | 100 [77-100]    | 59 [50-68] ε    | 100 [94-100]                  | 25 [16-37]                    | 0                     | 75 (54) ε                  |
|                                                     | HScTnT           | 14 ng/L               | 100 [78-100]    | 87 [80-92] ε    | 100 [96-100]                  | 51 [34-68]                    | 0                     | 111 (77)                   |
|                                                     |                  | 5 ng/L                | 100 [78-100]    | 60 [51-68] ε ζ  | 100 [94-100]                  | 35 [23-50]                    | 0                     | 77 (53) ε μ                |
|                                                     | HS-cTnT+copeptin | 14 ng/L and 12 pmol/L | 100 [78-100]    | 55 [46-64] ε ζ  | 100 [94-100]                  | 24 [15-35]                    | 0                     | 70 (49) ε                  |
| 5 ng/L and 12 pmol/L                                |                  | 100 [78-100]          | 40 [32-49] ε ζ  | 100 [91-100]    | 19 [12-29]                    | 0                             | 51 (35) ε             |                            |

(\*) 0.04 μg/L for Bicêtre and Montpellier hospitals, 0.14 μg/L for other sites; (\*\*), false negative patients

ε p<0.05 versus cTnI alone; ζ p<0.05 versus HS-cTnT <14 ng/L alone; ψ p<0.05 versus delay >4h; μ, p<0.05 versus delay <2h

**Table 5:** Potentially misdiagnosed patients with low cTn thresholds and copeptin

| Sex | Age  | Dyslipidaemia | Smoke | Diabetes | Hypertension | Personal history of CAD | Chest pain since : | CPO <sup>*</sup> category   | cTnI (µg/L) | HScTnT (ng/L) | Copeptin (pmol/L) |
|-----|------|---------------|-------|----------|--------------|-------------------------|--------------------|-----------------------------|-------------|---------------|-------------------|
| M   | 89   | no            | no    | no       | yes          | yes                     | 1 hours 15 min     | <2h (very early presenters) | 0.04        | 44.9          | 208.7             |
| M   | 86   | yes           | no    | no       | yes          | yes                     | 30 min             |                             | 0.06        | 11.3          | 77.2              |
| W   | 35   | no            | no    | no       | no           | no                      | 50 min             |                             | 0.01        | 3             | 54.7              |
| W   | 44   | no            | yes   | no       | no           | no                      | 45 min             |                             | 0.01        | 3             | 10.7              |
| W   | 74   | yes           | no    | no       | yes          | yes                     | 3 hrs              | 2-4h                        | 0.04        | 8.8           | 10.7              |
| M   | 34,2 | yes           | yes   | no       | no           | no                      | 2 hrs 35 min       |                             | 0.04        | 3             | 23.5              |
| M   | 55   | yes           | no    | no       | no           | yes                     | 3 hrs 50 min       |                             | 0.02        | 6             | 25.9              |
| M   | 34   | no            | yes   | no       | no           | no                      | 3 hrs 15 min       |                             | 0.01        | 4             | 52.4              |
| M   | 61   | yes           | yes   | no       | yes          | yes                     | 3 hrs              |                             | 0.03        | 19.7          | 27.2              |
| M   | 59   | no            | no    | no       | no           | no                      | 2 hrs 45 min       |                             | 0.04        | 10.1          | 241.8             |

CAD, coronary artery disease; CPO, chest pain onset; M, men; W, women.

1  
2  
3  
4  
5  
6  
7  
8  
9  
10  
11  
12  
13  
14  
15  
16  
17  
18  
19  
20  
21  
22  
23  
24  
25  
26  
27  
28  
29  
30  
31  
32  
33  
34  
35  
36  
37  
38  
39  
40  
41  
42  
43  
44  
45  
46  
47  
48  
49  
50  
51  
52  
53  
54  
55  
56  
57  
58  
59  
60

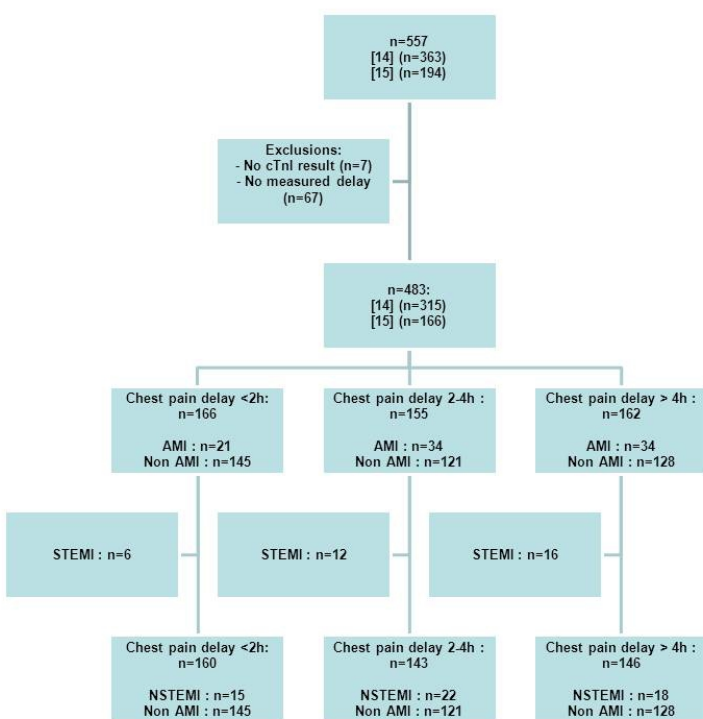

Figure 1: Flow chart of the studied population.

254x190mm (96 x 96 DPI)

1  
2  
3  
4  
5  
6  
7  
8  
9  
10  
11  
12  
13  
14  
15  
16  
17  
18  
19  
20  
21  
22  
23  
24  
25  
26  
27  
28  
29  
30  
31  
32  
33  
34  
35  
36  
37  
38  
39  
40  
41  
42  
43  
44  
45  
46  
47  
48  
49  
50  
51  
52  
53  
54  
55  
56  
57  
58  
59  
60

**A. CPO<2h**

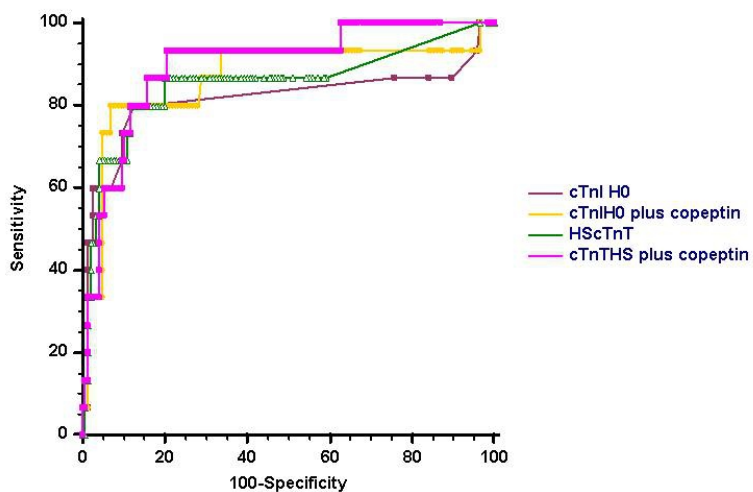

Figure 2: ROC curves of cTn for the diagnosis of NSTEMI, alone or in combination with copeptin. A, CPO<2h; B, CPO 2-4h; C. CPO >4h.

254x190mm (96 x 96 DPI)

1  
2  
3  
4  
5  
6  
7  
8  
9  
10  
11  
12  
13  
14  
15  
16  
17  
18  
19  
20  
21  
22  
23  
24  
25  
26  
27  
28  
29  
30  
31  
32  
33  
34  
35  
36  
37  
38  
39  
40  
41  
42  
43  
44  
45  
46  
47  
48  
49  
50  
51  
52  
53  
54  
55  
56  
57  
58  
59  
60

**B. CPO 2-4h**

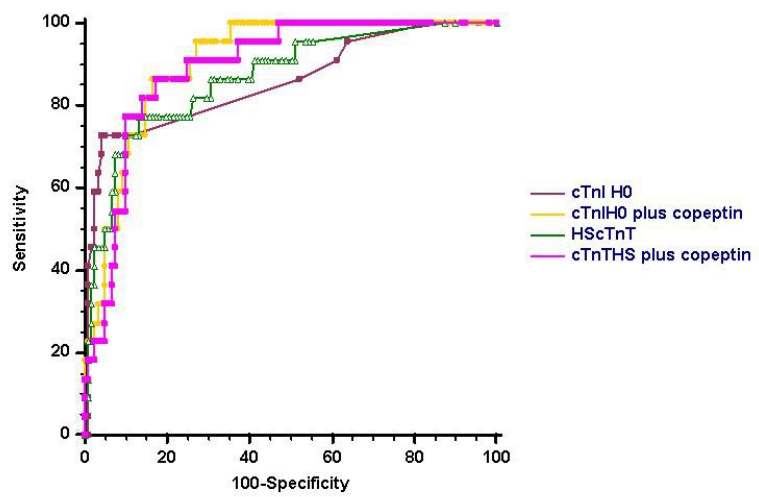

Figure 2: ROC curves of cTn for the diagnosis of NSTEMI, alone or in combination with copeptin. A, CPO<2h; B, CPO 2-4h; C. CPO >4h.

254x190mm (96 x 96 DPI)

1  
2  
3  
4  
5  
6  
7  
8  
9  
10  
11  
12  
13  
14  
15  
16  
17  
18  
19  
20  
21  
22  
23  
24  
25  
26  
27  
28  
29  
30  
31  
32  
33  
34  
35  
36  
37  
38  
39  
40  
41  
42  
43  
44  
45  
46  
47  
48  
49  
50  
51  
52  
53  
54  
55  
56  
57  
58  
59  
60

**C. CPO >4h**

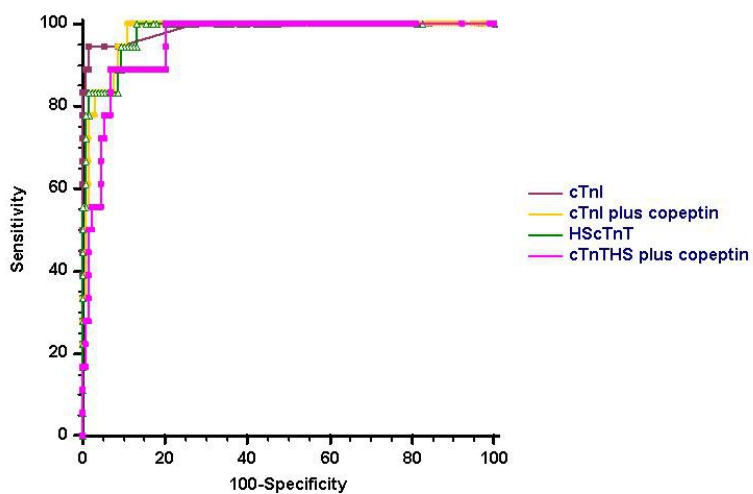

Figure 2: ROC curves of cTn for the diagnosis of NSTEMI, alone or in combination with copeptin. A, CPO <2h; B, CPO 2-4h; C. CPO >4h.

254x190mm (96 x 96 DPI)



| Section & Topic          | No  | Item                                                                                                                                                   | Reported on page #                   |
|--------------------------|-----|--------------------------------------------------------------------------------------------------------------------------------------------------------|--------------------------------------|
| <b>TITLE OR ABSTRACT</b> |     |                                                                                                                                                        |                                      |
|                          | 1   | Identification as a study of diagnostic accuracy using at least one measure of accuracy (such as sensitivity, specificity, predictive values, or AUC)  | Page 1                               |
| <b>ABSTRACT</b>          |     |                                                                                                                                                        |                                      |
|                          | 2   | Structured summary of study design, methods, results, and conclusions (for specific guidance, see STARD for Abstracts)                                 | Page 2                               |
| <b>INTRODUCTION</b>      |     |                                                                                                                                                        |                                      |
|                          | 3   | Scientific and clinical background, including the intended use and clinical role of the index test                                                     | Page 4                               |
|                          | 4   | Study objectives and hypotheses                                                                                                                        | Pages 4 and 5                        |
| <b>METHODS</b>           |     |                                                                                                                                                        |                                      |
| <i>Study design</i>      | 5   | Whether data collection was planned before the index test and reference standard were performed (prospective study) or after (retrospective study)     | Page 6                               |
| <i>Participants</i>      | 6   | Eligibility criteria                                                                                                                                   | pp6&7 + Table1 p22                   |
|                          | 7   | On what basis potentially eligible participants were identified (such as symptoms, results from previous tests, inclusion in registry)                 | Pages 6-8                            |
|                          | 8   | Where and when potentially eligible participants were identified (setting, location and dates)                                                         | Page 6                               |
|                          | 9   | Whether participants formed a consecutive, random or convenience series                                                                                | Page 6                               |
| <i>Test methods</i>      | 10a | Index test, in sufficient detail to allow replication                                                                                                  | Pages 8 and 9                        |
|                          | 10b | Reference standard, in sufficient detail to allow replication                                                                                          | Pages 8 and 9                        |
|                          | 11  | Rationale for choosing the reference standard (if alternatives exist)                                                                                  | Page 7                               |
|                          | 12a | Definition of and rationale for test positivity cut-offs or result categories of the index test, distinguishing pre-specified from exploratory         | Page 9                               |
|                          | 12b | Definition of and rationale for test positivity cut-offs or result categories of the reference standard, distinguishing pre-specified from exploratory | Pages 8 and 9                        |
|                          | 13a | Whether clinical information and reference standard results were available to the performers/readers of the index test                                 | Pages 6, 8 and 9                     |
|                          | 13b | Whether clinical information and index test results were available to the assessors of the reference standard                                          | Page 7                               |
| <i>Analysis</i>          | 14  | Methods for estimating or comparing measures of diagnostic accuracy                                                                                    | Page 9                               |
|                          | 15  | How indeterminate index test or reference standard results were handled                                                                                | Page 7                               |
|                          | 16  | How missing data on the index test and reference standard were handled                                                                                 | Flow chart (Figure1) + pages 6 and 7 |
|                          | 17  | Any analyses of variability in diagnostic accuracy, distinguishing pre-specified from exploratory                                                      | Pages 6 and 7                        |
|                          | 18  | Intended sample size and how it was determined                                                                                                         | NA                                   |
| <b>RESULTS</b>           |     |                                                                                                                                                        |                                      |
| <i>Participants</i>      | 19  | Flow of participants, using a diagram                                                                                                                  | Flow chart (Figure1) + pages 6 and 7 |
|                          | 20  | Baseline demographic and clinical characteristics of participants                                                                                      | Table 2, page 23                     |
|                          | 21a | Distribution of severity of disease in those with the target condition                                                                                 | Table 2, page 23                     |
|                          | 21b | Distribution of alternative diagnoses in those without the target condition                                                                            | Table 2, page 23                     |
|                          | 22  | Time interval and any clinical interventions between index test and reference standard                                                                 | NA                                   |
| <i>Test results</i>      | 23  | Cross tabulation of the index test results (or their distribution) by the results of the reference standard                                            | Tables 3&4, p.24-25                  |
|                          | 24  | Estimates of diagnostic accuracy and their precision (such as 95% confidence intervals)                                                                | Table 4, page 25                     |
|                          | 25  | Any adverse events from performing the index test or the reference standard                                                                            | Table 5 page 26                      |
| <b>DISCUSSION</b>        |     |                                                                                                                                                        |                                      |
|                          | 26  | Study limitations, including sources of potential bias, statistical uncertainty, and generalisability                                                  | Page 15                              |
|                          | 27  | Implications for practice, including the intended use and clinical role of the index test                                                              | Page 16                              |
| <b>OTHER INFORMATION</b> |     |                                                                                                                                                        |                                      |
|                          | 28  | Registration number and name of registry                                                                                                               | Table 1, page 22                     |
|                          | 29  | Where the full study protocol can be accessed                                                                                                          | Table 1 page 22                      |
|                          | 30  | Sources of funding and other support; role of funders                                                                                                  | NA                                   |

# STARD 2015

---

## AIM

STARD stands for “Standards for Reporting Diagnostic accuracy studies”. This list of items was developed to contribute to the completeness and transparency of reporting of diagnostic accuracy studies. Authors can use the list to write informative study reports. Editors and peer-reviewers can use it to evaluate whether the information has been included in manuscripts submitted for publication.

---

## EXPLANATION

A **diagnostic accuracy study** evaluates the ability of one or more medical tests to correctly classify study participants as having a **target condition**. This can be a disease, a disease stage, response or benefit from therapy, or an event or condition in the future. A medical test can be an imaging procedure, a laboratory test, elements from history and physical examination, a combination of these, or any other method for collecting information about the current health status of a patient.

The test whose accuracy is evaluated is called **index test**. A study can evaluate the accuracy of one or more index tests. Evaluating the ability of a medical test to correctly classify patients is typically done by comparing the distribution of the index test results with those of the **reference standard**. The reference standard is the best available method for establishing the presence or absence of the target condition. An accuracy study can rely on one or more reference standards.

If test results are categorized as either positive or negative, the cross tabulation of the index test results against those of the reference standard can be used to estimate the **sensitivity** of the index test (the proportion of participants *with* the target condition who have a positive index test), and its **specificity** (the proportion *without* the target condition who have a negative index test). From this cross tabulation (sometimes referred to as the contingency or “2x2” table), several other accuracy statistics can be estimated, such as the positive and negative **predictive values** of the test. Confidence intervals around estimates of accuracy can then be calculated to quantify the statistical **precision** of the measurements.

If the index test results can take more than two values, categorization of test results as positive or negative requires a **test positivity cut-off**. When multiple such cut-offs can be defined, authors can report a receiver operating characteristic (ROC) curve which graphically represents the combination of sensitivity and specificity for each possible test positivity cut-off. The **area under the ROC curve** informs in a single numerical value about the overall diagnostic accuracy of the index test.

The **intended use** of a medical test can be diagnosis, screening, staging, monitoring, surveillance, prediction or prognosis. The **clinical role** of a test explains its position relative to existing tests in the clinical pathway. A replacement test, for example, replaces an existing test. A triage test is used before an existing test; an add-on test is used after an existing test.

Besides diagnostic accuracy, several other outcomes and statistics may be relevant in the evaluation of medical tests. Medical tests can also be used to classify patients for purposes other than diagnosis, such as staging or prognosis. The STARD list was not explicitly developed for these other outcomes, statistics, and study types, although most STARD items would still apply.

---

## DEVELOPMENT

This STARD list was released in 2015. The 30 items were identified by an international expert group of methodologists, researchers, and editors. The guiding principle in the development of STARD was to select items that, when reported, would help readers to judge the potential for bias in the study, to appraise the applicability of the study findings and the validity of conclusions and recommendations. The list represents an update of the first version, which was published in 2003.

More information can be found on <http://www.equator-network.org/reporting-guidelines/stard>.

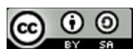

# BMJ Open

## High-sensitivity troponin alone or in combination with copeptin is not enough for ruling out NSTEMI in very early presenters at admission in Emergency Department.

|                                 |                                                                                                                                                                                                                                                                                                                                                                                                                                                                                                                                                                                                                                                                                                                  |
|---------------------------------|------------------------------------------------------------------------------------------------------------------------------------------------------------------------------------------------------------------------------------------------------------------------------------------------------------------------------------------------------------------------------------------------------------------------------------------------------------------------------------------------------------------------------------------------------------------------------------------------------------------------------------------------------------------------------------------------------------------|
| Journal:                        | <i>BMJ Open</i>                                                                                                                                                                                                                                                                                                                                                                                                                                                                                                                                                                                                                                                                                                  |
| Manuscript ID                   | bmjopen-2018-023994.R1                                                                                                                                                                                                                                                                                                                                                                                                                                                                                                                                                                                                                                                                                           |
| Article Type:                   | Research                                                                                                                                                                                                                                                                                                                                                                                                                                                                                                                                                                                                                                                                                                         |
| Date Submitted by the Author:   | 17-Oct-2018                                                                                                                                                                                                                                                                                                                                                                                                                                                                                                                                                                                                                                                                                                      |
| Complete List of Authors:       | Chenevier-Gobeaux, Camille; Hopital Cochin, SDBA<br>Sebbane, Mustapha; Centre Hospitalier Regional Universitaire de Montpellier, Emergency Departement<br>Meune, Christophe; Avicenne University Hospital, Cardiology; Paris 13 University,<br>Lefebvre, Sophie; Centre Hospitalier Regional Universitaire de Montpellier, Emergency department<br>Dupuy, Anne-Marie; Montpellier University Hospital Centre, Department of Biochemistry<br>Lefevre, Guillaume; Hopital Tenon, Laboratoire de Biochimie et Hormonologie<br>Peschanski, Nicolas; CHU de Rouen, Service des Urgences Adultes; Institute for Biomedical Research and Innovation , INSERM U1096<br>Ray, Patrick; Hopital Tenon, Emergency Department |
| <b>Primary Subject Heading</b>: | Emergency medicine                                                                                                                                                                                                                                                                                                                                                                                                                                                                                                                                                                                                                                                                                               |
| Secondary Subject Heading:      | Diagnostics                                                                                                                                                                                                                                                                                                                                                                                                                                                                                                                                                                                                                                                                                                      |
| Keywords:                       | high sensitive cardiac troponin, non ST-elevation acute myocardial infarction, copeptin, very early presenters, chest pain onset                                                                                                                                                                                                                                                                                                                                                                                                                                                                                                                                                                                 |
|                                 |                                                                                                                                                                                                                                                                                                                                                                                                                                                                                                                                                                                                                                                                                                                  |

SCHOLARONE™  
Manuscripts

1  
2  
3 **Revised manuscript Ref: bmjopen-2018-023994\_R1**  
4  
5

6 **High-sensitivity troponin alone or in combination with copeptin is not enough for ruling out**  
7 **NSTEMI in very early presenters at admission in Emergency Department.**  
8

9  
10  
11 Camille Chenevier-Gobeaux (1), Mustafa Sebbane (2), Christophe Meune (3, 4), Sophie Lefebvre  
12  
13 (2), Anne-Marie Dupuy (5), Guillaume Lefèvre (6, 7), Nicolas Peschanski (8), Patrick Ray (9,  
14  
15 10)  
16

17  
18  
19  
20 **Authors' affiliations**

21 (1) Service de Diagnostic Biologique Automatisé, Hôpital Cochin, Hôpitaux Universitaires Paris  
22 Centre (HUPC), Assistance Publique des Hôpitaux de Paris (AP-HP), Paris, France.  
23 [camille.gobeaux@aphp.fr](mailto:camille.gobeaux@aphp.fr)

24 (2) Département des Urgences, Hôpital Lapeyronie, CHU de Montpellier, Montpellier, France.  
25 [m-sebbane@chu-montpellier.fr](mailto:m-sebbane@chu-montpellier.fr) ; [s-lefevre@chu-montpellier.fr](mailto:s-lefevre@chu-montpellier.fr)

26 (3). Service de Cardiologie, Hôpital Avicenne, Hôpitaux Universitaires Paris Seine Saint Denis,  
27 Assistance Publique des Hôpitaux de Paris (AP-HP), Bobigny; Université Paris 13, Paris, France.  
28 [christophe.meune@aphp.fr](mailto:christophe.meune@aphp.fr)

29 (4) INSERM UMR S-942, Paris, France

30 (5) Département de Biochimie, Hôpital Lapeyronie – CHU Montpellier - MONTPELLIER  
31 France. [am-dupuy@chu-montpellier.fr](mailto:am-dupuy@chu-montpellier.fr)

32 (6) Laboratoire de Biochimie et Hormonologie, Hôpital Tenon, Hôpitaux Universitaires Est  
33 Parisien, Assistance Publique des Hôpitaux de Paris (AP-HP), Paris, France.  
34 [guillaume.lefevre@aphp.fr](mailto:guillaume.lefevre@aphp.fr)

35 (7) Sorbonne Universités UPMC-University Paris06, GRC-14 BIOSFAST, Paris.

36 (8) Urgences-SMUR, Centre Hospitalier Eure-Seine - Hôpital d'Evreux, Rue Léon  
37 Schwartzberg, 27015 Évreux, France. [n.peschanski@neuf.fr](mailto:n.peschanski@neuf.fr)

38 (9) Centre Régional Universitaire des Urgences, Hôpital François Mitterrand, 5 Boulevard Jeanne  
39 d'Arc, 21000 Dijon, France. [patrick.ray@chu-dijon.fr](mailto:patrick.ray@chu-dijon.fr)

40 (10) Université de Bourgogne, Dijon, France.  
41  
42  
43  
44

45  
46  
47 **Correspondance:**

48 Camille Chenevier-Gobeaux, Service de Diagnostic Biologique Automatisé, Hôpital Cochin,  
49 Hôpitaux Universitaires Paris Centre, Assistance Publique des Hôpitaux de Paris (AP-HP), 27 rue  
50 du Fbg St Jacques, 75679 Paris cedex 14, France. Tel : +33 1 58 41 19 16. Fax : + 33 1 58 41 31  
51 84. Mail: [camille.gobeaux@aphp.fr](mailto:camille.gobeaux@aphp.fr)  
52  
53  
54  
55  
56  
57  
58  
59  
60

1  
2  
3 **Keywords:** high sensitive cardiac troponin, chest pain, non ST-elevation acute myocardial  
4  
5 infarction, copeptin, very early presenters, chest pain onset  
6  
7  
8  
9  
10  
11  
12  
13  
14  
15  
16  
17  
18  
19  
20  
21  
22  
23  
24  
25  
26  
27  
28  
29  
30  
31  
32  
33  
34  
35  
36  
37  
38  
39  
40  
41  
42  
43  
44  
45  
46  
47  
48  
49  
50  
51  
52  
53  
54  
55  
56  
57  
58  
59  
60

For peer review only

## Abstract

**Objectives:** Copeptin and high-sensitivity cardiac troponin (HS-cTn) assays improve the early detection of NSTEMI. Their sensitivities may however be reduced in very early presenters.

**Setting:** We performed a post-hoc analysis of three prospective studies that included patients who presented to the Emergency Department for chest pain onset (CPO) of less than 6 hours.

**Participants:** 449 patients were included, in whom 12% had NSTEMI. CPO occurred <2h from ED presentation in 160, between 2-4h in 143, and >4h in 146 patients. The prevalence of NSTEMI was similar in all groups (9%, 13% and 12%, respectively,  $p=0.281$ ).

**Measures:** Diagnostic performances of HS-cTn and copeptin at presentation were examined according to CPO. The discharge diagnosis was adjudicated by 2 experts, including cTnI. HS-cTn and copeptin were blindly measured.

**Results:** Diagnostic accuracies of cTnI, cTnI+copeptin and HS-cTnT (but not HS-cTnT+copeptin) lower through CPO categories. For patients with CPO<2h, the choice of a threshold value of 14 ng/L for HS-cTnT resulted in 3 false negative (Sensitivity 80% [95%CI: 51-95]; specificity 85% [78-90]; 79% of correctly ruled-out patients) and that of 5 ng/L in 2 false negative (Sensitivity 87% [59-98]; specificity 58% [50-66]; 52% of correctly ruled-out patients). The addition of copeptin to HS-cTnT induced a decrease of misclassified patients to 1 in patients with CPO<2h (Sensitivity 93% [66-100]; specificity 41% [33-50]).

**Conclusion:** A single measurement of HS-cTn, alone or in combination with copeptin at admission, does not allow safely ruling out NSTEMI in very early presenters (with CPO<2h).

**Trial registrations:** French Health Ministry (no. DC-2009-1052), French Local Ethic comity « Comité de Protection des Personnes Ile-de-France » III (Hôpital Cochin) et VI (CHU Pitié-Salpêtrière).

### Strengths

- Focus on very early chest pain presenters that was not performed before

### Limitations of our study

- Small numbers of very early chest pain presenters, although the data grouping of 3 previous studies
- A single measurement of troponin at admission was considered for the analysis, but not its kinetics
- The gold standard diagnosis was based on a non-HS cTn.

## Introduction

The management of patients with acute chest pain at the Emergency Department (ED) is a major health problem and an adequate ruling out process for non-ST elevation acute myocardial infarction (NSTEMI) is crucial. Cardiac troponin (cTn) measurement with conventional assays and more recent high-sensitivity cardiac troponin assays (HS-cTn), are current diagnostic tools for the assessment of these patients (1). The European Society of Cardiology guidelines proposed a rapid rule-out strategy using low HS-cTn values (i.e. values below the Limit of Detection of the assay -LoD-) as decisional threshold for ruling out NSTEMI (1). The accuracy of a rapid 0-hour/1-hour algorithm has also been recently demonstrated in patients with CPO<6h (2) and is endorsed by the latest ESC guidelines (1). In this analysis, the authors indicated that using a single HS-cTnT cutoff value of 14 ng/L at presentation resulted in 88.7% sensitivity and 97.3% negative predictive value (NPV), but that this single assay strategy was less effective than the combination of absolute level of HS-cTnT measured at presentation and again at 1 hour, combined with the absolute difference between the two levels (2).

However, in very early presenters, such rapid and efficient triage at presentation may be uncertain (3). Indeed, very early presenters, defined as having chest pain <2h, are considered by some authors as highly vulnerable as they may not present all symptoms and signs and thus be exposed to a higher risk of misdiagnosis and therefore worse outcome (4); the application of a rapid algorithm to these patients may lead to early discharge within 3 hours from ED admission. Recently, a meta-analysis (based on eleven studies) indicated that a single HS-cTnT concentration below the limit of detection may successfully rule out AMI (5). However, concerns have been raised about the safety of a single measurement rule out protocol performed at presentation in early presenters (6,7).



1  
2  
3 Copeptin (in association with cTn) assays improve the early detection of NSTEMI (8–12). Indeed,  
4  
5 a randomized controlled trial demonstrated the safety of early discharge using a single  
6  
7 combination of copeptin + cTn at presentation for patients with CPO <6h (13).  
8  
9

10 The present study aimed to assess the diagnostic performance of HS-cTn and copeptin as a single  
11  
12 measurement at admission in very early ED presenters with suspected NSTEMI.  
13  
14  
15  
16  
17  
18  
19  
20  
21  
22  
23  
24  
25  
26  
27  
28  
29  
30  
31  
32  
33  
34  
35  
36  
37  
38  
39  
40  
41  
42  
43  
44  
45  
46  
47  
48  
49  
50  
51  
52  
53  
54  
55  
56  
57  
58  
59  
60

For peer review only

## Patients and methods

### *Study design and population*

The study is a *post-hoc* analysis of three French prospective clinical studies (already published) of cardiac biomarker testing, each to explore the usefulness of copeptin and/or HS-cTnT testing in patients who presented to the ED with acute chest pain of less than 6h (14,15). However, none of these studies evaluated the influence of CPO value on diagnostic performances. All three trials had comparable inclusion/exclusion criteria and gathered similar clinical information (Table 1). Patients requiring renal replacement therapy were excluded. All studies received approval from local Institutional Review Board. The study complied with the principles of the Declaration of Helsinki. Recommendations of the Standards for Reporting of Diagnostic Accuracy (STARD) initiative were applied (16).

### *Patient Involvement*

The development of the research question was not informed by patients. Patients were not involved in the design of this study. Patients were not involved in the recruitment to and conduct of the study. There was no results dissemination to study participants.

### *Routine assessment*

All patients underwent an initial clinical evaluation (including clinical history, physical examination, 12-lead ECG, pulse oximetry, routine blood tests, and chest X-ray). Conventional cardiac Troponin I (cTnI) was measured on a venous blood collection performed at presentation and, if required, repeated after 3 to 9 h, as clinically indicated (17). The onset of chest pain (CPO), defined as the delay from symptom onset to presentation was recorded, based on patient history/declaration. When history was incomplete or inconsistent, CPO was not recorded and

/

1  
2  
3 patient was excluded of the analysis (see flow chart, Figure 1). Based on all clinical, biological  
4 (including cTnI value, but not HS-cTnT and copeptin values which were blindly measured) and  
5  
6  
7 imaging results, a decision was made by the attending physician to admit or discharge the patient,  
8  
9  
10 as well as medical therapy and revascularization if indicated. Attending emergency physicians  
11  
12 and cardiologists were blinded to the results of HS-cTnT and copeptin, and biologists were  
13  
14 blinded to the suspected diagnosis at presentation.

15  
16  
17 Patients with no cTnI results and/or no recorded CPO value, and patients with a final diagnosis of  
18  
19 STEMI, were excluded (see flowchart, Figure 1).  
20  
21  
22

### 23 ***Gold standard diagnosis***

24  
25  
26 The gold standard diagnosis was adjudicated by two independent experts (emergency physician  
27  
28 and cardiologist) who reviewed all available medical records (including patient history, physical  
29  
30 findings, laboratory results including cTnI value and radiologic testing, ECG, echocardiography,  
31  
32 cardiac exercise test, coronary angiography, summary chart at discharge) pertaining to the patient  
33  
34 from the time of ED presentation to 30-day follow-up. Experts were blind to copeptin and HS-  
35  
36 cTnT results. In the event of diagnostic disagreement, cases were reviewed and adjudicated in  
37  
38 conjunction with a third expert.  
39  
40

41  
42 AMI was diagnosed according to the universal definition that was in force at the time of  
43  
44 inclusions and adapted to the use of a conventional cTn (18). Thus, patients with a cTnI increase  
45  
46 (or a rise/fall pattern) above the 10%CV threshold, associated with at least one of the following:  
47  
48 symptoms of myocardial ischemia, new ST-T changes or new Q wave on ECG, imaging of new  
49  
50 loss of viable myocardium, or normal cTnI on admission, were classified as having an MI  
51  
52 (STEMI with a ST elevation in at least 2 continuous leads on ECG or new onset of left bundle  
53  
54 branch block, or NSTEMI). STEMI patients were excluded from the analysis, based on ST  
55  
56  
57

1  
2  
3 elevation observed on the ECG (see Flow chart, Fig. 1). Patients were classified according to the  
4  
5 CPO, <2h, from 2-4h and >4h; those with a CPO <2 hours were considered as very early  
6  
7 presenters.  
8

9  
10 Unstable angina (UA) diagnosis was adjudicated in patients with history or clinical symptoms  
11  
12 consistent with ACS but without ST-T changes on the ECG and without change of cTn on serial  
13  
14 testing. Other diagnostic categories beside NSTEMI and UA were non-ACS (e.g., stable angina,  
15  
16 myocarditis, arrhythmias, heart failure, pulmonary embolism, and chest pain of unknown origin).  
17  
18 UA and non-ACS chest pain were considered as non-NSTEMI in our analysis.  
19  
20  
21  
22  
23

### 24 ***Troponin measurements***

25  
26 Plasma cTnI concentrations were routinely measured on an X-pand® HM analyzer, using the  
27  
28 Cardiac Troponin-I immunoassay (Siemens Healthcare Diagnostics Inc., Newark, CT) in two  
29  
30 EDs (Cochin and La Pitié Salpêtrière Hospitals). The limit of detection (LoD) was 0.04 µg/L (40  
31  
32 ng/L). The limit of quantitation (LoQ), i.e. the 10% imprecision point (or 10% CV), which is the  
33  
34 lowest cTn concentration that can be reproducibly measured with a between-run CV of ≤10%,  
35  
36 was 0.14 µg/L (140 ng/L). The 99<sup>th</sup> percentile of the assay was 0.07 µg/L (70 ng/L), with  
37  
38 coefficients of variations (CV) between 15 to 22 %. The measuring range was 0.04 to 40 µg/L  
39  
40 (40 to 40,000 ng/L), and the imprecision values across the measuring range were below 10%.  
41  
42  
43

44  
45 In Bicêtre and in Montpellier hospitals, plasma cTnI concentrations were routinely measured on  
46  
47 an Access® analyser (Beckman Coulter, Inc., Brea, CA). According to the manufacturer's data,  
48  
49 the limit of detection (LoD) was 0.01 µg/L (10 ng/L), the 20% point on the imprecision curve  
50  
51 was 0.02 µg/L (20 ng/L). The LoQ/10%CV was 0.04 µg/L (40 ng/L). The 99<sup>th</sup> percentile of the  
52  
53  
54  
55  
56  
57  
58  
59  
60

1  
2  
3 assay was 0.04 µg/L (40 ng/L). The measuring range was 0.01 to 100 µg/L (10 to 100,000 ng/L),  
4  
5 and the imprecision values across the measuring range were below 10%.

6  
7 After routine cTnI measurement, plasma samples were aliquoted and frozen (-40°C) until HS-  
8  
9 cTnT and copeptin measurement.

10  
11 Hs-cTnT was measured in heparinized collected samples, on an Elecsys2010® analyser (Roche  
12  
13 Diagnostics, Meylan, France). The limit of blank (LoB) \*was 3 ng/L, the LoD was 5 ng/L, and  
14  
15 the 99<sup>th</sup> percentile was 14 ng/L. The measuring range was 3 to 10,000 ng/L. In our laboratory,  
16  
17 CVs obtained in Roche quality controls containing 27.5 and 2,360 ng/L of cTnT were 3.6 and  
18  
19 2.8 % (between-run precision) and 1.4 and 0.4 % (within-run precision). Of note, the LoD is  
20  
21 measured with a between-run CV of >10%, while the 99<sup>th</sup> percentile is a precise concentration  
22  
23 (CV<10%) (7). HS-cTnT determinations were performed blinded to the clinical assessment of the  
24  
25 emergency physicians.  
26  
27  
28  
29  
30  
31  
32

### 33 ***Copeptin measurement***

34  
35 Copeptin was measured in heparinized blood samples collected on admission. The assay was  
36  
37 performed on a KRYPTOR® analyser using ThermoFisher Scientific sandwich  
38  
39 immunoluminometric assay (B.R.A.H.M.S Copeptin KRYPTOR, B.R.A.H.M.S  
40  
41 Aktiengesellschaft, Hennigsdorf, Germany). The assay principle is based on TRACE technology  
42  
43 (Time-Resolved Amplified Cryptate Emission). The lower detection limit is 4.8 pmol/L, and the  
44  
45 functional assay sensitivity (20%CV value) is <12 pmol/L (data from manufacturer,  
46  
47 recommended threshold value for this method). Copeptin determinations were performed blinded  
48  
49 to the clinical assessment of the emergency physicians.  
50  
51  
52  
53  
54  
55

### 56 ***Statistical analysis***

1  
2  
3 Continuous variables are presented as means  $\pm$  SD, and categorical variables are expressed as  
4 numbers (percentage). Continuous variables were compared by using the Kruskal-Wallis test, and  
5  
6  
7  
8  
9  
10  
11  
12  
13  
14  
15  
16  
17  
18  
19  
20  
21  
22  
23  
24  
25  
26  
27  
28  
29  
30  
31  
32  
33  
34  
35  
36  
37  
38  
39  
40  
41  
42  
43  
44  
45  
46  
47  
48  
49  
50  
51  
52  
53  
54  
55  
56  
57  
58  
59  
60

Continuous variables are presented as means  $\pm$  SD, and categorical variables are expressed as numbers (percentage). Continuous variables were compared by using the Kruskal-Wallis test, and categorical variables were assessed using Pearson's  $\chi^2$  test. Number of misclassified patients and number of correctly ruled-out patients were collected for each threshold strategy, and correspond to the false negative and the true positive patients, respectively.

Receiver operating characteristic (ROC) curves were constructed to assess the sensitivity and specificity, positive predictive value (PPV) and negative predictive value (NPV) throughout the concentrations of cTnI, HS-cTnT and copeptin for the diagnosis of NSTEMI, and according to the CPO. cTn and copeptin values were log-transformed before combination for ROC analysis. For cTnI values, as they were obtained from two non-standardized methods, values were normalized by factorizing to the 99th percentile of the method prior to ROC analysis in order to remove any bias due to methodological differences.

Diagnostic thresholds that were used for classification of the data are:

- For cTnI, the LoQ values: 0.04  $\mu\text{g/L}$  (40 ng/L) for Bicêtre and Montpellier hospitals, 0.14  $\mu\text{g/L}$  (140 ng/L) for other sites,
- For HS-cTnT, The LoB (3 ng/L), the LoD (5 ng/L) and the 99<sup>th</sup> percentile (14 ng/L),
- For copeptin, the manufacturer's recommended threshold at 12 pmol/L.

All data are presented with their 95% confidence intervals [95%CI]. All hypothesis testing was two-tailed, and  $p < 0.05$  was considered statistically significant. Statistical analysis was performed using MedCalc (MedCalc Software, Version 12.4.0.0, Mariakerke, Belgium).

## Results

### *Characteristics of the studied population*

Table 2 shows the characteristics of the studied population. Briefly, in the total cohort mean age was  $58 \pm 17$  years, and included more males. A gold standard diagnosis of NSTEMI was adjudicated in 55 patients (12%). Delay from chest pain onset to ED admission was  $<2$  hours in 160 (36%) patients, was from 2 to 4 hours in 143 (32%) and was  $>4$  hours (and below 6 hours) in 146 (32%) patients. Very early presenters with NSTEMI ( $n=15$ ) tended to be older than those without NSTEMI ( $n=145$ ) (65 vs. 55 years-old), were more frequently hospitalized (93% vs. 58%), and also more frequently underwent diagnostic coronary angiography (73% vs. 27%).

### *Diagnostic performances according to CPO*

ROC curves of cTn for the diagnosis of NSTEMI, alone or in combination with copeptin are presented in Figure 2. Diagnostic accuracies of cTnI, cTnI+copeptin and HS-cTnT are reduced when time to onset of chest pain gets less, as indicated by estimated AUCs and their 95%CI intervals (Table 3). The AUCs of HS-cTnT+copeptin were not different through the CPO categories.

Diagnostic performances of cTn, alone or in combination with copeptin, and using different decisional thresholds, are presented in Table 4.

In very early presenters (CPO  $<2$  hours), a single value of cTnI alone had low sensitivity (73 [73-91] %) but high specificity (97 [92-99]%), and misclassified 4 of 15 NSTEMI patients. However, this strategy could correctly rule-out 141 patients (88%). Combining copeptin with cTnI increases sensitivity, and lowers the number of misdiagnosed patients from 4 to 2, but significantly lowers the rate of ruled-out patients from 88% to 54% (Table 4). Of note, addition

1  
2  
3 of copeptin also significantly lowered specificity. At a threshold of 14 ng/L, HS-cTnT had low  
4 sensitivity (80 [59-98] %), misclassified 3 NSTEMI patients but could correctly rule-out 123  
5 (79%) patients, which is less than using cTnI. The sensitivity of HS-TnT alone is likely to be  
6 suboptimal in early presenters, but can be improved by using a lower threshold for positivity or  
7 adding copeptin (but this is accompanied with a marked loss of specificity). The addition of  
8 copeptin induced a decrease in misclassified patients from 2 to 1, either with an HS-cTnT  
9 threshold at 14 or at 5 ng/L. This ultimate misdiagnosed NSTEMI patient with CPO <2h who  
10 presented with all undetectable biomarkers was a 44-years old woman with a history of smoking  
11 and no CV risk factors; the CPO was 45 min before hospital admission (Table 5).

12  
13  
14 In patients with CPO 2-4 hours, results are similar to those observed in very early presenters,  
15 although the number of misclassified patients was different (Table 4). Adding copeptin to cTnI  
16 induced a decrease of misclassified patients from 5 to 1 for an HS-cTnT threshold at 14 ng/L, and  
17 from 2 to 0 for an HS-cTnT threshold at 5 ng/L. In particular, combining copeptin to the LoD (5  
18 ng/L) of HS-cTnT reached 100% sensitivity of the test. Similar performance was observed using  
19 the LoB (3ng/L) of HS-cTnT. Indeed, all NSTEMI patients with CPO 2-4 h had a detectable HS-  
20 cTnT and/or an elevated copeptin. In this sub-group again, the use of copeptin lowered  
21 significantly the specificity of the test.

22  
23  
24 As expected, in patients with CPO >4 hours, all patients had quantitative cTnI and detectable HS-  
25 cTnT. No patient was misclassified. The addition of copeptin in this sub-group had no effect on  
26 sensitivity or misclassified patients.

### 27 28 29 ***Potential misdiagnosed NSTEMI***

30  
31  
32 Characteristics of potential misdiagnosed NSTEMI patients are detailed in Table 5. All  
33 potentially missed NSTEMI in the very early presenters population had a CPO <1 hour. We



1  
2  
3 found no distinguishing characteristics in misclassified patients when comparing to correctly  
4 diagnosed patients in terms of age, sex, and cardiovascular risks, in each CPO category. Of note,  
5  
6 when STEMI patients were included in our analysis, results were comparable (data not shown).  
7  
8  
9  
10  
11  
12  
13  
14  
15  
16  
17  
18  
19  
20  
21  
22  
23  
24  
25  
26  
27  
28  
29  
30  
31  
32  
33  
34  
35  
36  
37  
38  
39  
40  
41  
42  
43  
44  
45  
46  
47  
48  
49  
50  
51  
52  
53  
54  
55  
56  
57  
58  
59  
60

For peer review only

## Discussion

Our results indicate that diagnostic performances of HS-cTnT values at admission, alone or combined with copeptin, are reduced in the subgroup of patients with shorter CPO. Emergency physicians should not rule out NSTEMI in very early presenters with a single low value of HS-cTnT and/or copeptin at presentation.

Our studied population included one third of early presenters, and this proportion is similar to that found by Boeddinghaus et al (26% of patients presented within 2h from CPO) (4), by Keller et al (37% and 38% of patients with CPO<3h, (8,19)), and by Reichlin et al. (222 patients with CPO<3h out of 718, i.e. 31%) (20). More recently, Stallone et al reported 519 (26%) patients that arrived within 2 hours of symptom onset to the ED (6). This may reflect that our study was performed in large urban areas equipped with pre-hospital emergency ambulances. A more prolonged delay might be expected in more rural regions. The exact definition of very early presenters is still a matter of debate. Authors nevertheless agree to define them as presenting before 2h (20). Very few studies examined the specific groups of early/very early presenters (4,6,8,20). In the ESC guidelines, a different strategy is recommended for patients with versus without CPO<6h but not for earlier presenters (1). We believe that this proportion is not negligible and the impact of this very early population might be underestimated in studies where the CPO is not evaluated.

We observed that AUCs of cTnI, cTnI+copeptin and HS-cTnT were significantly lower when CPO<4h. The NPVs were not significantly impacted by the CPO, but a suboptimal sensitivity and a non-negligible proportion of misclassified NSTEMI was observed in patients with CPO<2h for all tested thresholds and combinations, even if cTnI and HS-cTnT performances can be improved by using a lower threshold for positivity or adding copeptin. The same was true for patients with CPO 2-4h, except when using the combination of HS-cTnT<5 ng/L and copeptin

1  
2  
3 <12  $\mu\text{mol/L}$ . We reported the number of misclassified patients in addition to sensitivity and NPV,  
4  
5 because NPV is known to be dependent of the prevalence, thus its value might be biased. The  
6  
7 absolute number of misdiagnosed patients might be more clinically pertinent than NPV (21).

8  
9  
10 As previously suggested (1), we found that sensitivity and NPV of a single measurement of HS-  
11  
12 cTn at admission is not enough to safely excluded a NSTEMI in very early presenters. We here  
13  
14 show that lowering HS-cTn decisional threshold to LoD or to LoB is not sufficient to detect all  
15  
16 NSTEMI among very early chest pain presenters. Although combining copeptin to HS-cTnT  
17  
18 increased sensitivity and lowered number of misclassified patients, none of the tested strategies  
19  
20 allowed for identification of all NSTEMI. Results obtained in very early presenters were very  
21  
22 similar to patients with CPO 2-4h, except that in this later sub-group combining copeptin with  
23  
24 HS-cTnT succeeded in significantly increasing sensitivity (all NSTEMI patients had a detectable  
25  
26 HS-cTnT and/or an elevated copeptin).

27  
28  
29  
30  
31 Our results can be compared to those of Boeddinghaus et al. who found that sensitivity of a single  
32  
33 HS-cTn measurement is lower in very early presenters, in comparison to all patients (4). These  
34  
35 authors indicated that using a single cut-off approach, 61% of the very early presenters were  
36  
37 ruled-out, which resulted in a sensitivity of 94% and a NPV of 98%. They conclude that the  
38  
39 single cutoff strategy should not be applied in early presenters. However, the authors did not  
40  
41 evaluate the impact of copeptin across CPO categories. In another study, the same authors  
42  
43 indicated that the additional use of copeptin did not sufficiently improve diagnostic accuracy in  
44  
45 early presenters (22). Here again, our results are in accordance with those of Boeddinghaus  
46  
47 indicating that copeptin did not improve diagnostic accuracy of hs-cTnI at presentation in early  
48  
49 presenters (22). Mueller et al showed, using the rapid 0-hour/1-hour algorithm that 63% patients  
50  
51 with CPO<6h were classified as rule-out. However, 7 patients were missed (0.9% rate), in whom  
52  
53 3 had HS-cTnT<LoD at presentation and at 1 hour (2). Moreover, a single cutoff value for HS-  
54  
55  
56  
57  
58  
59  
60

1  
2  
3 cTnT at 14 ng/L at presentation resulted in a sensitivity of 88.7% and a NPV of 97.3%, and  
4  
5 performed less adequately than the combination of HS-cTnT at presentation with 1-hour level  
6  
7 and 1-hour absolute change (2). In a more recent study, Mokhtari et al. evaluated a rapid 0H/1H  
8  
9 protocol for discharge chest pain patients based on a single value <LoD at admission (23). These  
10  
11 authors found 2 missed patients in their population, and recognize that the safety of such rapid  
12  
13 protocol is not clear in very early presenters. They further recommend additional HS-cTnT  
14  
15 testing at 3 hours for very early presenters (23).  
16  
17

18  
19 Performance of cardiac troponins, although measured using HS assays, might be limited in very  
20  
21 early presenters because of their kinetics of release into the blood circulation (8). The release of  
22  
23 cTn into the circulation following cardiomyocyte damage is a time-dependent phenomenon (24),  
24  
25 and a single measurement approach may fail at identifying AMI very early after the onset of  
26  
27 symptoms (25). Indeed we, like other authors, found very early presenters with undetectable HS-  
28  
29 cTnT at admission. Time-dependent release of copeptin during AMI has been described earlier,  
30  
31 and this biomarker has been considered as an early biomarker (8). Copeptin increases  
32  
33 immediately after induction of ischemia, and peaks 90 min after (26). However, some authors  
34  
35 recently indicated that copeptin kinetics might be different in NSTEMI in comparison to STEMI,  
36  
37 and that if copeptin is increased at first medical contact in the ambulance, the circulating  
38  
39 concentrations may rapidly decrease down to normal ranges at the time of hospital admission  
40  
41 (27). Our results are in accordance with this observation, as we found one misdiagnosed  
42  
43 NSTEMI very early presenter with non-elevated copeptin.  
44  
45  
46  
47  
48

49  
50 Lastly, our results are reinforced by those of Stallone et al who found that the additional use of  
51  
52 copeptin did not increase diagnostic accuracy in very early presenters (6). Furthermore, the NPV  
53  
54 for the combination of HS-cTnT and copeptin was lower in patients arriving in the first 2 hours  
55  
56 than in those arriving after 2 hours (6). However, these authors did not evaluate the LoD nor  
57  
58

1  
2  
3 LoB ? of HS-cTnT in their work. We here report that even when lowering the cutoff of HS-cTnT,  
4  
5 the combination of HS-cTnT and copeptin is not enough to detect all NSTEMI among all very  
6  
7 early presenters. Our study and the one of Stallone et al. (6) are in accordance with previous  
8  
9 studies that have shown that there is no or marginal benefit when adding copeptin to HS-cTn  
10  
11 assays; indeed, Wildi et al. indicated that copeptin provides no significant increase in AUC when  
12  
13 combined to HS-cTn (28), either in their all population or in patients with CPO<4h. These  
14  
15 authors found an incremental value in sensitivities, NPV and calculating the integrated  
16  
17 discrimination improvement index (IDI), but they did not evaluated low HS-cTn thresholds such  
18  
19 as LoB and LoD values (28).  
20  
21  
22

23  
24 Of note, all patients with CPO >4 hours had detectable cTnI and HS-cTnT, i.e. the use of  
25  
26 copeptin in this situation added no gain. Other studies reported that copeptin testing for the rule  
27  
28 out of NSTEMI should be limited to CPO< 6 hours (1,13). According to our data, the added  
29  
30 value of copeptin might be more restricted, but further studies are needed to confirm our findings.  
31  
32 The current ESC guidelines incorporate an additional criterion for direct rule-out of patients that  
33  
34 are not very early presenters; indeed, the rapid rule-out is possible only if CPO is >3h (1).  
35  
36 Furthermore, this rapid algorithm can be used only for 3 HS-cTn assays, including HS-cTnT.  
37  
38 Considering our data about patients with CPO >4h, we note that our conclusions are in line with  
39  
40 the recommendations. Therefore, the use of a 0/1h-algorithm might be used for a safe rule-out in  
41  
42 patients that are not very early presenters.  
43  
44  
45  
46  
47  
48

### 49 **Limitations of our study**

50  
51 First, it is a post-hoc analysis of three previously published studies, and some data are missing  
52  
53 (vital signs at admission, details in ECG findings for example). Second, only a single  
54  
55 measurement of troponin at admission was considered for this analysis, and we did not evaluate  
56  
57  
58  
59  
60

1  
2  
3 its kinetics; we therefore cannot comment on the accuracy of the recent 1h algorithm in our  
4 population (1,2). Third, different cTn assays were used across the different centers (11–13) and  
5 we had to normalize cTnI values before analysis in order to minimize bias. However, all centers  
6 evaluated the same HS-cTnT and copeptin. Fourth, as the gold standard diagnosis was based on a  
7 non-HS cTn, we recognize that this could result in underdiagnosis of myocardial injury. Previous  
8 studies have shown that an early rule-out of NSTEMI using hs-cTn alone, also in the vulnerable  
9 subgroup of early presenters, is safe (with high AUC, sensitivities and NPV in patients presenting  
10 with CPO<3h) (20). In our study, the combined biomarkers are not safe-enough for early rule-out  
11 of NSTEMI in patients presenting very early (CPO<2h). The fact that gold standard diagnoses  
12 were adjudicated by the use of a conventional but not a hs-cTn assay, and that different assays  
13 were used, may have led to underdiagnose patients. This point limits the generalizability of our  
14 findings and explains why sensitivities and NPVs were much lower as compared to previous  
15 studies. However, our results are comparable to those of Stallone et al how recently used an HS-  
16 cTn, as suggested by our AUC (0.85[95%CI : 0.79-0.90]) in comparison to those of Stallone  
17 (0.86 [95%CI:0.82-.090]) (6). However, the aim of our work is not to evaluate another time  
18 global HS-cTn accuracy, but to highlight CPO effects on diagnostic accuracy of HS-cTn  
19 combined or not to copeptin. Fifth, we examined 3 subgroups with CPO<2h, 2-4h and 4h and  
20 defined very early presenters as those having CPO <2 hours, as based on the accepted definition  
21 of early presenters (20). Even if very early presenters represent more than one third of the studied  
22 population, the number of very early presenters (CPO<2h) is relatively small, although data from  
23 three cohorts was used. This explains why false rule-out of 3 patients results in a significant drop  
24 in sensitivity and NPV. Many previous studies investigated the rule-out performance in early  
25 presenters using e.g. the LoD of hs-cTnT and hs-cTnI and found much higher sensitivities and  
26 NPVs. This can be explained due to a larger number of patients (4, 20).

## Conclusion

A single measurement of HS-cTnT alone or in combination with copeptin at admission seems not sensitive enough to safely rule out NSTEMI in very early presenters (chest pain onset < 2 hours from ED admission). If other studies confirm our findings, another strategy to safely exclude NSTEMI in this specific population that represents one third of chest pain patients is warranted.

## Acknowledgments

The authors would like to thank again the nursing, technical and medical staff at the emergency departments and biochemistry laboratories for their assistance throughout the original studies.

Reagents for the Kryptor<sup>®</sup> Compact Plus and HS-cTnT assays used for the 3 studies were kindly provided by ThermoFisher Scientific and Roche Diagnostic, France, respectively.

## Figure legends:

**Figure 1:** Flow chart of the studied population.

**Figure 2:** ROC curves of cTn for the diagnosis of NSTEMI, alone or in combination with copeptin. A, CPO<2h; B, CPO 2-4h; C. CPO >4h.

## Contributorship statement:

PR, CM, MS, and NP contributed to the design and inclusions. CCG, SL, AMD and GL realized sample collections and biomarker measurements. CCG and PR realized statistical analysis. All

1  
2  
3 authors approved the final manuscript. ThermoFisher Scientific and Roche Diagnostic provided  
4  
5 reagents.  
6  
7  
8  
9  
10

11  
12 **Competing interests:**  
13

14 CCG, PR and CM received honorarias and lecture fees from Roche Diagnostics and  
15  
16 Thermofisher Scientific.  
17  
18  
19  
20  
21  
22

23  
24 **Funding:**  
25

26 None  
27  
28  
29  
30  
31  
32

33 **Data sharing statement:**  
34

35 No data sharing  
36  
37  
38  
39  
40  
41  
42  
43  
44  
45  
46  
47  
48  
49  
50  
51  
52  
53  
54  
55  
56  
57  
58  
59  
60



## References

1. Roffi M, Patrono C, Collet J-P, Mueller C, Valgimigli M, Andreotti F, et al. 2015 ESC Guidelines for the management of acute coronary syndromes in patients presenting without persistent ST-segment elevation: Task Force for the Management of Acute Coronary Syndromes in Patients Presenting without Persistent ST-Segment Elevation of the European Society of Cardiology (ESC). *Eur Heart J*. 14 janv 2016;37(3):267-315.
2. Mueller C, Giannitsis E, Christ M, Ordóñez-Llanos J, deFilippi C, McCord J, et al. Multicenter Evaluation of a 0-Hour/1-Hour Algorithm in the Diagnosis of Myocardial Infarction With High-Sensitivity Cardiac Troponin T. *Ann Emerg Med*. juill 2016;68(1):76-87.e4.
3. Wildi K, Nelles B, Twerenbold R, Rubini Giménez M, Reichlin T, Singeisen H, et al. Safety and efficacy of the 0 h/3 h protocol for rapid rule out of myocardial infarction. *Am Heart J*. nov 2016;181:16-25.
4. Boeddinghaus J, Nestelberger T, Twerenbold R, Wildi K, Badertscher P, Cupa J, et al. Direct Comparison of Four Very Early Rule-Out Strategies for Acute Myocardial Infarction Using High-Sensitivity Cardiac Troponin I. *Circulation*. 10 mars 2017;
5. Pickering JW, Than MP, Cullen L, Aldous S, Ter Avest E, Body R, et al. Rapid Rule-out of Acute Myocardial Infarction With a Single High-Sensitivity Cardiac Troponin T Measurement Below the Limit of Detection: A Collaborative Meta-analysis. *Ann Intern Med*. 18 avr 2017;
6. Stallone F, Schoenenberger AW, Puelacher C, Rubini Gimenez M, Walz B, Naduvilekoot Devasia A, et al. Incremental value of copeptin in suspected acute myocardial infarction very early after symptom onset. *Eur Heart J Acute Cardiovasc Care*. sept 2016;5(5):407-15.
7. Chenevier-Gobeaux C, Lefevre G, Bonnefoy-Cudraz E, Charpentier S, Dehoux M, Meune C, et al. Why a new algorithm using high-sensitivity cardiac troponins for the rapid rule-out of NSTEMI is not adapted to routine practice. *Clin Chem Lab Med*. 1 oct 2016;54(10):e279-280.

- 1  
2  
3 8. Keller T, Tzikas S, Zeller T, Czyz E, Lillpopp L, Ojeda FM, et al. Copeptin improves  
4  
5 early diagnosis of acute myocardial infarction. *J Am Coll Cardiol*. 11 mai 2010;55(19):2096-106.  
6
- 7  
8 9. Reichlin T, Hochholzer W, Stelzig C, Laule K, Freidank H, Morgenthaler NG, et al.  
9  
10 Incremental value of copeptin for rapid rule out of acute myocardial infarction. *J Am Coll*  
11  
12 *Cardiol*. 30 juin 2009;54(1):60-8.  
13
- 14  
15 10. Lipinski MJ, Escárcega RO, D'Ascenzo F, Magalhães MA, Baker NC, Torguson R, et al.  
16  
17 A systematic review and collaborative meta-analysis to determine the incremental value of  
18  
19 copeptin for rapid rule-out of acute myocardial infarction. *Am J Cardiol*. 1 mai  
20  
21 2014;113(9):1581-91.  
22
- 23  
24 11. Raskovalova T, Twerenbold R, Collinson PO, Keller T, Bouvaist H, Folli C, et al.  
25  
26 Diagnostic accuracy of combined cardiac troponin and copeptin assessment for early rule-out of  
27  
28 myocardial infarction: a systematic review and meta-analysis. *Eur Heart J Acute Cardiovasc Care*.  
29  
30 mars 2014;3(1):18-27.  
31
- 32  
33 12. Chenevier-Gobeaux C, Freund Y, Claessens Y-E, Guérin S, Bonnet P, Doumenc B, et al.  
34  
35 Copeptin for rapid rule out of acute myocardial infarction in emergency department. *Int J Cardiol*.  
36  
37 5 juin 2013;166(1):198-204.  
38
- 39  
40 13. Möckel M, Searle J, Hamm C, Slagman A, Blankenberg S, Huber K, et al. Early  
41  
42 discharge using single cardiac troponin and copeptin testing in patients with suspected acute  
43  
44 coronary syndrome (ACS): a randomized, controlled clinical process study. *Eur Heart J*. 7 févr  
45  
46 2015;36(6):369-76.  
47
- 48  
49 14. Sebbane M, Lefebvre S, Kuster N, Jreige R, Jacques E, Badiou S, et al. Early rule out of  
50  
51 acute myocardial infarction in ED patients: value of combined high-sensitivity cardiac troponin T  
52  
53 and ultrasensitive copeptin assays at admission. *Am J Emerg Med*. sept 2013;31(9):1302-8.  
54  
55  
56  
57  
58  
59

- 1  
2  
3 15. Chenevier-Gobeaux C, Meune C, Lefevre G, Doumenc B, Sorbets E, Peschanski N, et al.  
4  
5 A single value of high-sensitive troponin T below the limit of detection is not enough for ruling  
6  
7 out non ST elevation myocardial infarction in the emergency department. *Clin Biochem.* oct  
8  
9 2016;49(15):1113-7.  
10
- 11  
12 16. Bossuyt PM, Reitsma JB, Bruns DE, Gatsonis CA, Glasziou PP, Irwig LM, et al. The  
13  
14 STARD statement for reporting studies of diagnostic accuracy: explanation and elaboration. *Ann*  
15  
16 *Intern Med.* 7 janv 2003;138(1):W1-12.  
17
- 18  
19 17. Hamm CW, Bassand J-P, Agewall S, Bax J, Boersma E, Bueno H, et al. ESC Guidelines  
20  
21 for the management of acute coronary syndromes in patients presenting without persistent ST-  
22  
23 segment elevation: The Task Force for the management of acute coronary syndromes (ACS) in  
24  
25 patients presenting without persistent ST-segment elevation of the European Society of  
26  
27 Cardiology (ESC). *Eur Heart J.* déc 2011;32(23):2999-3054.  
28
- 29  
30 18. Thygesen K, Alpert JS, Jaffe AS, Simoons ML, Chaitman BR, White HD, et al. Third  
31  
32 universal definition of myocardial infarction. *Circulation.* 16 oct 2012;126(16):2020-35.  
33
- 34  
35 19. Keller T, Zeller T, Ojeda F, Tzikas S, Lillpopp L, Sinning C, et al. Serial changes in  
36  
37 highly sensitive troponin I assay and early diagnosis of myocardial infarction. *JAMA.* 28 déc  
38  
39 2011;306(24):2684-93.  
40
- 41  
42 20. Reichlin T, Hochholzer W, Bassetti S, Steuer S, Stelzig C, Hartwiger S, et al. Early  
43  
44 diagnosis of myocardial infarction with sensitive cardiac troponin assays. *N Engl J Med.* 27 août  
45  
46 2009;361(9):858-67.  
47
- 48  
49 21. Righini M, Aujesky D, Roy P-M, Cornuz J, de Moerloose P, Bounameaux H, et al.  
50  
51 Clinical usefulness of D-dimer depending on clinical probability and cutoff value in outpatients  
52  
53 with suspected pulmonary embolism. *Arch Intern Med.* 13 déc 2004;164(22):2483-7.  
54  
55  
56  
57  
58  
59

- 1  
2  
3 22. Boeddinghaus J, Reichlin T, Nestelberger T, Twerenbold R, Meili Y, Wildi K, et al. Early  
4 diagnosis of acute myocardial infarction in patients with mild elevations of cardiac troponin. Clin  
5 Res Cardiol Off J Ger Card Soc. 1 févr 2017;  
6  
7  
8  
9  
10 23. Mokhtari A, Lindahl B, Schioppa A, Yndigezn T, Khoshnood A, Gilje P, et al. A 0h/1h  
11 protocol for safe early discharge of chest pain patients. Acad Emerg Med Off J Soc Acad Emerg  
12 Med. 13 mai 2017;  
13  
14  
15  
16  
17 24. White HD. Pathobiology of troponin elevations: do elevations occur with myocardial  
18 ischemia as well as necrosis? J Am Coll Cardiol. 14 juin 2011;57(24):2406-8.  
19  
20  
21 25. Korley FK. The Wait for High-Sensitivity Troponin Is Over-Proceed Cautiously. JAMA  
22 Cardiol. 13 déc 2017;  
23  
24  
25  
26 26. Gu YL, Voors AA, Zijlstra F, Hillege HL, Struck J, Masson S, et al. Comparison of the  
27 temporal release pattern of copeptin with conventional biomarkers in acute myocardial infarction.  
28 Clin Res Cardiol Off J Ger Card Soc. déc 2011;100(12):1069-76.  
29  
30  
31  
32  
33 27. Slagman A, Searle J, Müller C, Möckel M. Temporal release pattern of copeptin and  
34 troponin T in patients with suspected acute coronary syndrome and spontaneous acute myocardial  
35 infarction. Clin Chem. oct 2015;61(10):1273-82.  
36  
37  
38  
39  
40 28. Wildi K, Zellweger C, Twerenbold R, Jaeger C, Reichlin T, Haff P, et al. Incremental  
41 value of copeptin to highly sensitive cardiac troponin I for rapid rule-out of myocardial infarction.  
42 Int J Cardiol. 2015;190:170-6.  
43  
44  
45  
46  
47  
48  
49  
50  
51  
52  
53  
54  
55  
56  
57  
58  
59  
60

**Table 1:** Main characteristics of original study designs

|                                    | <b>Sebbane et al. (14)</b>                                                 | <b>Chenevier-Gobeaux et al. (15)</b>                                                                                              |
|------------------------------------|----------------------------------------------------------------------------|-----------------------------------------------------------------------------------------------------------------------------------|
| <b>Inclusion Criteria</b>          | Prospective cohort of ED patients with CPO <12h                            | Consecutive patients, >18 years old, admitted to the ED or to the ICU by pre-hospital emergency ambulances                        |
| <b>Exclusion criteria</b>          | Patients with traumatic causes of chest pain                               | Patients <18 years old<br>Acute or chronic renal failure requiring dialysis                                                       |
| <b>Plasma sampling and storage</b> | Heparinized and EDTA blood collection. Storage at -80°C for later analysis | Heparinized blood collection after routine cTnI measurement. Storage at -40°C until HS-cTnT and copeptin measurement              |
| <b>Registration number/name</b>    | French Health Ministry (no. DC-2009-1052)                                  | French Local Ethic comity « Comité de Protection des Personnes Ile-de-France » III (Hôpital Cochin) et VI (CHU Pitié-Salpêtrière) |
| <b>Consent</b>                     | Written informed consent                                                   | Cochin Hospital: waiver of informed consent was authorized. Pitié-Salpêtrière Hospital: informed consent was granted.             |

**Table 2:** Main Characteristics of the studied population

|                              | All patients | CPO <2h<br>(very early<br>presenters) | CPO 2-4h   | CPO 4-6h   |
|------------------------------|--------------|---------------------------------------|------------|------------|
| <b>n</b>                     | 449          | 160                                   | 143        | 146        |
| <b>Age (years)</b>           | 58 ± 17      | 57 ± 16                               | 59 ± 17    | 58 ± 17    |
| <b>Men</b>                   | 281 (63)     | 101 (63)                              | 96 (67)    | 84 (58)    |
| <b>Past medical history:</b> |              |                                       |            |            |
| Familial history of          | 104/301 (35) | 63/147 (43)                           | 26/90 (29) | 15/64 (23) |
| CAD, present/total (%) *     | 120 (27)     | 38 (24)                               | 42 (29)    | 40 (27)    |
| Personal history of          |              |                                       |            |            |
| CAD                          | 168 (37)     | 61 (38)                               | 57 (40)    | 50 (34)    |
| Dyslipidaemia                | 67 (15)      | 20 (13)                               | 22 (15)    | 25 (17)    |
| Diabetes                     | 176 (39)     | 72 (45)                               | 51 (37)    | 53 (36)    |
| Smoking                      | 158 (35)     | 52 (33)                               | 58 (41)    | 48 (33)    |
| Hypertension                 |              |                                       |            |            |
| <b>Outcome:</b>              |              |                                       |            |            |
| Coronary angiography         | 131 (29)     | 49 (31)                               | 46 (32)    | 36 (25)    |
| Admission                    | 256 (57)     | 98 (61)                               | 91 (63)    | 67 (46)    |
| <b>Final Diagnostic:</b>     |              |                                       |            |            |
| NSTEMI                       | 55 (12)      | 15 (9)                                | 22 (13)    | 18 (12)    |
| other                        | 394 (88)     | 145 (91)                              | 121 (85)   | 128 (88)   |

CAD, coronary artery disease; CPO, chest pain onset; NSTEMI, non ST-elevation myocardial infarction. Results are expressed in mean ± SD or in number (percentage)

1  
2  
3 \*, missing data exist for this variable.  
4  
5  
6  
7  
8  
9  
10  
11  
12  
13  
14  
15  
16  
17  
18  
19  
20  
21  
22  
23  
24  
25  
26  
27  
28  
29  
30  
31  
32  
33  
34  
35  
36  
37  
38  
39  
40  
41  
42  
43  
44  
45  
46  
47  
48  
49  
50  
51  
52  
53  
54  
55  
56  
57  
58  
59  
60

For peer review only

**Table 3:** AUC values according to CPO category

|                                       | <b>Biomarker</b>   | AUC   | 95% CI         |
|---------------------------------------|--------------------|-------|----------------|
| CPO <2h<br>(very early<br>presenters) | cTnI               | 0.841 | 0.775 to 0.894 |
|                                       | cTnI + copeptin    | 0.880 | 0.819 to 0.926 |
|                                       | HS-cTnT            | 0.853 | 0.789 to 0.904 |
|                                       | HS-cTnT + copeptin | 0.897 | 0.840 to 0.940 |
| CPO 2-4h                              | cTnI               | 0.886 | 0.823 to 0.933 |
|                                       | cTnI + copeptin    | 0.915 | 0.857 to 0.955 |
|                                       | HS-cTnT            | 0.869 | 0.802 to 0.919 |
|                                       | HS-cTnT + copeptin | 0.891 | 0.829 to 0.937 |
| CPO >4h                               | cTnI               | 0.995 | 0.965 to 1.000 |
|                                       | cTnI + copeptin    | 0.979 | 0.940 to 0.995 |
|                                       | HS-cTnT            | 0.980 | 0.942 to 0.996 |
|                                       | HS-cTnT + copeptin | 0.953 | 0.905 to 0.981 |

AUC, area under the ROC curve; CPO, chest pain onset



**Table 4:** Diagnostic performances for NSTEMI according to onset chest pain

| CPO                                                    | Biomarker        | Threshold             | Sensitivity<br>(%, [95%CI]) | Specificity<br>(%, [95%CI]) | Negative<br>predictive value<br>(%, [95%CI]) | Positive<br>predictive value<br>(%, [95%CI]) | Misdiagnosed<br>(**) (n) | Correctly ruled-<br>out, n (%) |
|--------------------------------------------------------|------------------|-----------------------|-----------------------------|-----------------------------|----------------------------------------------|----------------------------------------------|--------------------------|--------------------------------|
| <b>&lt;2h</b><br>(very early<br>presenters)<br>(n=160) | cTnI             | LoQ (*)               | 73 [45-91]                  | 97 [92-99]                  | 97 [92-99]                                   | 73 [45-91]                                   | 4                        | 141 (88)                       |
|                                                        | cTnI + copeptin  | LoQ (*) and 12 pmol/L | 87 [59-98]                  | 60 [52-68] ε                | 98 [92-100]                                  | 18 [7-24] ε                                  | 2                        | 87 (54) ε                      |
|                                                        | HScTnT           | 14 ng/L               | 80 [51-95]                  | 85 [78-90] ε                | 98 [93-100]                                  | 35 [20-53]                                   | 3                        | 123 (79) ε                     |
|                                                        |                  | 5 ng/L                | 87 [59-98]                  | 58 [50-66] ε ζ              | 98 [92-100]                                  | 18 [10-29] ε                                 | 2                        | 84 (52) ε ζ                    |
|                                                        |                  | 3 ng/L                | 87[58-98]                   | 40 [32-49] ε ζ              | 97 [88-99]                                   | 13 [7-22] ε                                  | 2                        | 58 (36) ε ζ                    |
|                                                        | HS-cTnT+copeptin | 14 ng/L and 12 pmol/L | 93 [66-100]                 | 54 [46-62] ε ζ              | 99 [93-100]                                  | 18 [10-29] ε                                 | 1                        | 79 (49) ε ζ                    |
|                                                        |                  | 5 ng/L and 12 pmol/L  | 93 [66-100]                 | 41 [33-50] ε ζ              | 98 [89-100]                                  | 14 [8-23] ε                                  | 1                        | 59 (37) ε ζ                    |
| 3 ng/L and 12 pmol/L                                   |                  | 93 [66-100]           | 25 [19-34] ε ζ              | 97 [85-100]                 | 12 [7-19] ε                                  | 1                                            | 37 (23) ε ζ              |                                |
| <b>2-4h</b><br>(n=143)                                 | cTnI             | LoQ (*)               | 73 [50-89]                  | 95 [89-98]                  | 95 [89-98] ψ                                 | 73 [50-89]                                   | 6                        | 115 (80)                       |
|                                                        | cTnI + copeptin  | LoQ (*) and 12 pmol/L | 95 [75-100]                 | 57 [48-66] ε                | 99 [92-100]                                  | 29 [19-41] ε                                 | 1                        | 69 (48) ε                      |
|                                                        | HScTnT           | 14 ng/L               | 77 [54-91]                  | 79 [71-86] ε                | 95 [88-98] ψ                                 | 40 [26-56]                                   | 5                        | 96 (67) ε μ                    |
|                                                        |                  | 5 ng/L                | 91 [70-98]                  | 55 [46-64] ε ζ              | 97 [89-100]                                  | 27 [18-39] ε                                 | 2                        | 67 (47) ε ζ                    |
|                                                        |                  | 3 ng/L                | 96 [75-100]                 | 45 [36-54] ε ζ              | 98 [89-100]                                  | 24 [16-34] ε                                 | 1                        | 54 (38) ε ζ                    |
|                                                        | HS-cTnT+copeptin | 14 ng/L and 12 pmol/L | 95 [75-100]                 | 50 [41-59] ε ζ              | 99 [91-100]                                  | 25 [17-36] ε                                 | 1                        | 58 (41) ε ζ                    |
|                                                        |                  | 5 ng/L and 12 pmol/L  | 100 [82-100]                | 35 [27-44] ε ζ              | 100 [90-100]                                 | 22 [15-32] ε                                 | 0                        | 42 (29) ε ζ                    |
| 3 ng/L and 12 pmol/L                                   |                  | 100 [82-100]          | 29 [21-38] ε ζ              | 100 [88-100]                | 20 [14-30] ε                                 | 0                                            | 35 (25) ε ζ              |                                |
| <b>&gt;4h</b><br>(n=146)                               | cTnI             | LoQ (*)               | 100 [77-100]                | 96 [91-99]                  | 100 [96-100]                                 | 77 [54-91]                                   | 0                        | 122 (85)                       |
|                                                        | cTnI + copeptin  | LoQ (*) and 12 pmol/L | 100 [77-100]                | 59 [50-68] ε                | 100 [94-100]                                 | 25 [16-37] ε                                 | 0                        | 75 (54) ε                      |
|                                                        | HScTnT           | 14 ng/L               | 100 [78-100]                | 87 [80-92] ε                | 100 [96-100]                                 | 51 [34-68]                                   | 0                        | 111 (77)                       |
|                                                        |                  | 5 ng/L                | 100 [78-100]                | 60 [51-68] ε ζ              | 100 [94-100]                                 | 35 [23-50] ε                                 | 0                        | 77 (53) ε μ ζ                  |
|                                                        |                  | 3 ng/L                | 100 [78-100]                | 52 [43-61] ε ζ              | 100 [96-100]                                 | 23 [14-34] ε                                 | 0                        | 67 (47) ε ζ                    |
|                                                        | HS-cTnT+copeptin | 14 ng/L and 12 pmol/L | 100 [78-100]                | 55 [46-64] ε ζ              | 100 [94-100]                                 | 24 [15-35] ε                                 | 0                        | 70 (49) ε ζ                    |
|                                                        |                  | 5 ng/L and 12 pmol/L  | 100 [78-100]                | 40 [32-49] ε ζ              | 100 [91-100]                                 | 19 [12-29] ε ζ                               | 0                        | 51 (35) ε ζ                    |
| 3 ng/L and 12 pmol/L                                   |                  | 100 [78-100]          | 34 [26-43] ε ζ              | 100 [96-100]                | 18 [11-27] ε ζ                               | 0                                            | 43 (30) ε ζ              |                                |

(\*) 0.04 μg/L (40 ng/L) for Bicêtre and Montpellier hospitals, 0.14 μg/L (140 ng/L) for other sites; (\*\*), false negative patients

ε p<0.05 versus cTnI alone; ζ p<0.05 versus HS-cTnT <14 ng/L alone; ψ p<0.05 versus delay >4h; μ, p<0.05 versus delay <2h

**Table 5:** Potentially misdiagnosed patients with low cTn thresholds and copeptin

| Sex | Age  | Dyslipidaemia | Smoke | Diabetes | Hypertension | Personal history of CAD | Chest pain since : | CPO` category               | cTnI                | HScTnT    | Copeptin     |
|-----|------|---------------|-------|----------|--------------|-------------------------|--------------------|-----------------------------|---------------------|-----------|--------------|
| M   | 89   | no            | no    | no       | yes          | yes                     | 1 hr 15 min        | <2h (very early presenters) | 0.04 µg/L (40 ng/L) | 44.9 ng/L | 208.7 pmol/L |
| M   | 86   | yes           | no    | no       | yes          | yes                     | 30 min             |                             | 0.06 µg/L (60 ng/L) | 11.3 ng/L | 77.2 pmol/L  |
| W   | 35   | no            | no    | no       | no           | no                      | 50 min             |                             | 0.01 µg/L (10 ng/L) | <3 ng/L   | 54.7 pmol/L  |
| W   | 44   | no            | yes   | no       | no           | no                      | 45 min             |                             | 0.01 µg/L (10 ng/L) | <3 ng/L   | 10.7 pmol/L  |
| W   | 74   | yes           | no    | no       | yes          | yes                     | 3 hrs              | 2-4h                        | 0.04 µg/L (40 ng/L) | 8.8 ng/L  | 10.7 pmol/L  |
| M   | 34,2 | yes           | yes   | no       | no           | no                      | 2 hrs 35 min       |                             | 0.04 µg/L (40 ng/L) | <3 ng/L   | 23.5 pmol/L  |
| M   | 55   | yes           | no    | no       | no           | yes                     | 3 hrs 50 min       |                             | 0.02 µg/L (20 ng/L) | 6 ng/L    | 25.9 pmol/L  |
| M   | 34   | no            | yes   | no       | no           | no                      | 3 hrs 15 min       |                             | 0.01 µg/L (10 ng/L) | 4 ng/L    | 52.4 pmol/L  |
| M   | 61   | yes           | yes   | no       | yes          | yes                     | 3 hrs              |                             | 0.03 µg/L (30 ng/L) | 19.7 ng/L | 27.2 pmol/L  |
| M   | 59   | no            | no    | no       | no           | no                      | 2 hrs 45 min       |                             | 0.04 µg/L (40 ng/L) | 10.1 ng/L | 241.8 pmol/L |

CAD, coronary artery disease; CPO, chest pain onset; M, men; W, women.

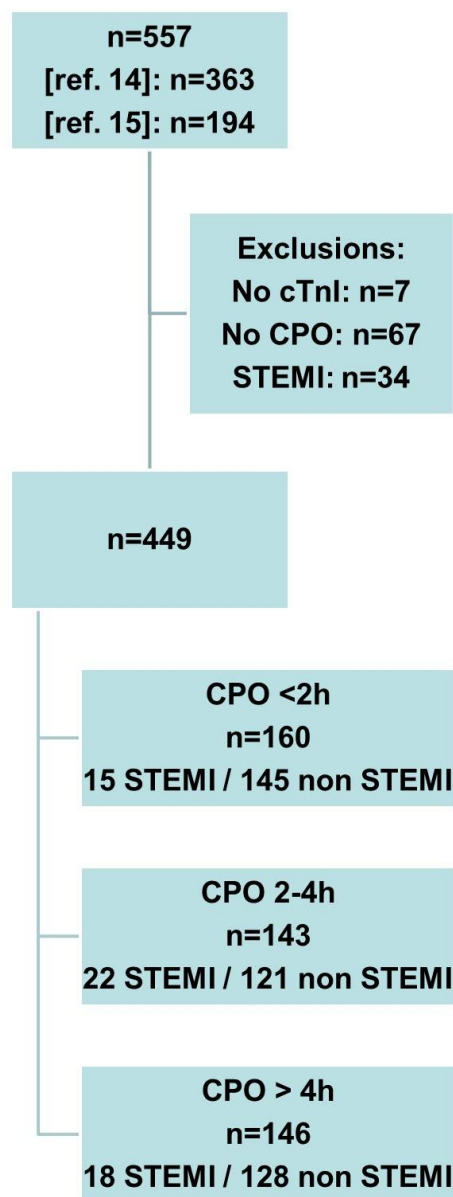

Figure 1: Flow chart of the studied population.

135x255mm (150 x 150 DPI)

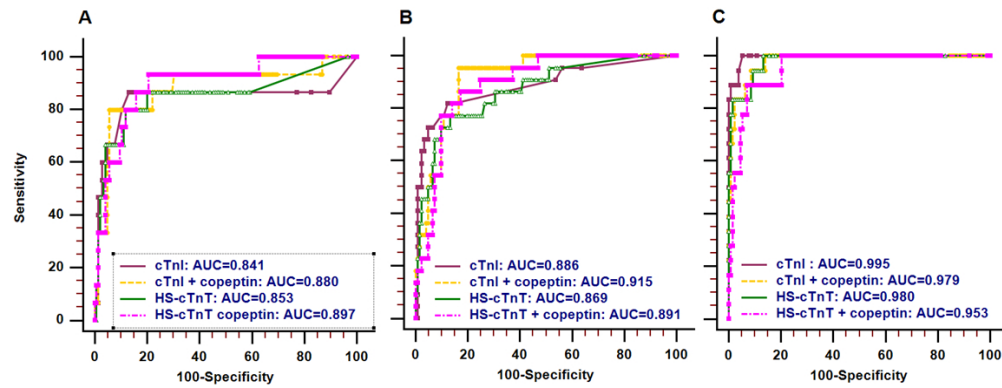

Figure 2: ROC curves of cTn for the diagnosis of NSTEMI, alone or in combination with copeptin. A, CPO < 2h; B, CPO 2-4h; C. CPO > 4h.

| Section & Topic          | No  | Item                                                                                                                                                   | Reported on page #                   |
|--------------------------|-----|--------------------------------------------------------------------------------------------------------------------------------------------------------|--------------------------------------|
| <b>TITLE OR ABSTRACT</b> |     |                                                                                                                                                        |                                      |
|                          | 1   | Identification as a study of diagnostic accuracy using at least one measure of accuracy (such as sensitivity, specificity, predictive values, or AUC)  | Page 1                               |
| <b>ABSTRACT</b>          |     |                                                                                                                                                        |                                      |
|                          | 2   | Structured summary of study design, methods, results, and conclusions (for specific guidance, see STARD for Abstracts)                                 | Page 2                               |
| <b>INTRODUCTION</b>      |     |                                                                                                                                                        |                                      |
|                          | 3   | Scientific and clinical background, including the intended use and clinical role of the index test                                                     | Page 4                               |
|                          | 4   | Study objectives and hypotheses                                                                                                                        | Pages 4 and 5                        |
| <b>METHODS</b>           |     |                                                                                                                                                        |                                      |
| <i>Study design</i>      | 5   | Whether data collection was planned before the index test and reference standard were performed (prospective study) or after (retrospective study)     | Page 6                               |
| <i>Participants</i>      | 6   | Eligibility criteria                                                                                                                                   | pp6&7 + Table1 p22                   |
|                          | 7   | On what basis potentially eligible participants were identified (such as symptoms, results from previous tests, inclusion in registry)                 | Pages 6-8                            |
|                          | 8   | Where and when potentially eligible participants were identified (setting, location and dates)                                                         | Page 6                               |
|                          | 9   | Whether participants formed a consecutive, random or convenience series                                                                                | Page 6                               |
| <i>Test methods</i>      | 10a | Index test, in sufficient detail to allow replication                                                                                                  | Pages 8 and 9                        |
|                          | 10b | Reference standard, in sufficient detail to allow replication                                                                                          | Pages 8 and 9                        |
|                          | 11  | Rationale for choosing the reference standard (if alternatives exist)                                                                                  | Page 7                               |
|                          | 12a | Definition of and rationale for test positivity cut-offs or result categories of the index test, distinguishing pre-specified from exploratory         | Page 9                               |
|                          | 12b | Definition of and rationale for test positivity cut-offs or result categories of the reference standard, distinguishing pre-specified from exploratory | Pages 8 and 9                        |
|                          | 13a | Whether clinical information and reference standard results were available to the performers/readers of the index test                                 | Pages 6, 8 and 9                     |
|                          | 13b | Whether clinical information and index test results were available to the assessors of the reference standard                                          | Page 7                               |
| <i>Analysis</i>          | 14  | Methods for estimating or comparing measures of diagnostic accuracy                                                                                    | Page 9                               |
|                          | 15  | How indeterminate index test or reference standard results were handled                                                                                | Page 7                               |
|                          | 16  | How missing data on the index test and reference standard were handled                                                                                 | Flow chart (Figure1) + pages 6 and 7 |
|                          | 17  | Any analyses of variability in diagnostic accuracy, distinguishing pre-specified from exploratory                                                      | Pages 6 and 7                        |
|                          | 18  | Intended sample size and how it was determined                                                                                                         | NA                                   |
| <b>RESULTS</b>           |     |                                                                                                                                                        |                                      |
| <i>Participants</i>      | 19  | Flow of participants, using a diagram                                                                                                                  | Flow chart (Figure1) + pages 6 and 7 |
|                          | 20  | Baseline demographic and clinical characteristics of participants                                                                                      | Table 2, page 23                     |
|                          | 21a | Distribution of severity of disease in those with the target condition                                                                                 | Table 2, page 23                     |
|                          | 21b | Distribution of alternative diagnoses in those without the target condition                                                                            | Table 2, page 23                     |
|                          | 22  | Time interval and any clinical interventions between index test and reference standard                                                                 | NA                                   |
| <i>Test results</i>      | 23  | Cross tabulation of the index test results (or their distribution) by the results of the reference standard                                            | Tables 3&4, p.24-25                  |
|                          | 24  | Estimates of diagnostic accuracy and their precision (such as 95% confidence intervals)                                                                | Table 4, page25                      |
|                          | 25  | Any adverse events from performing the index test or the reference standard                                                                            | Table 5 page 26                      |
| <b>DISCUSSION</b>        |     |                                                                                                                                                        |                                      |
|                          | 26  | Study limitations, including sources of potential bias, statistical uncertainty, and generalisability                                                  | Page 15                              |
|                          | 27  | Implications for practice, including the intended use and clinical role of the index test                                                              | Page 16                              |
| <b>OTHER INFORMATION</b> |     |                                                                                                                                                        |                                      |
|                          | 28  | Registration number and name of registry                                                                                                               | Table 1, page22                      |
|                          | 29  | Where the full study protocol can be accessed                                                                                                          | Table 1 page 22                      |
|                          | 30  | Sources of funding and other support; role of funders                                                                                                  | NA                                   |

# STARD 2015

---

## AIM

STARD stands for “Standards for Reporting Diagnostic accuracy studies”. This list of items was developed to contribute to the completeness and transparency of reporting of diagnostic accuracy studies. Authors can use the list to write informative study reports. Editors and peer-reviewers can use it to evaluate whether the information has been included in manuscripts submitted for publication.

---

## EXPLANATION

A **diagnostic accuracy study** evaluates the ability of one or more medical tests to correctly classify study participants as having a **target condition**. This can be a disease, a disease stage, response or benefit from therapy, or an event or condition in the future. A medical test can be an imaging procedure, a laboratory test, elements from history and physical examination, a combination of these, or any other method for collecting information about the current health status of a patient.

The test whose accuracy is evaluated is called **index test**. A study can evaluate the accuracy of one or more index tests. Evaluating the ability of a medical test to correctly classify patients is typically done by comparing the distribution of the index test results with those of the **reference standard**. The reference standard is the best available method for establishing the presence or absence of the target condition. An accuracy study can rely on one or more reference standards.

If test results are categorized as either positive or negative, the cross tabulation of the index test results against those of the reference standard can be used to estimate the **sensitivity** of the index test (the proportion of participants *with* the target condition who have a positive index test), and its **specificity** (the proportion *without* the target condition who have a negative index test). From this cross tabulation (sometimes referred to as the contingency or “2x2” table), several other accuracy statistics can be estimated, such as the positive and negative **predictive values** of the test. Confidence intervals around estimates of accuracy can then be calculated to quantify the statistical **precision** of the measurements.

If the index test results can take more than two values, categorization of test results as positive or negative requires a **test positivity cut-off**. When multiple such cut-offs can be defined, authors can report a receiver operating characteristic (ROC) curve which graphically represents the combination of sensitivity and specificity for each possible test positivity cut-off. The **area under the ROC curve** informs in a single numerical value about the overall diagnostic accuracy of the index test.

The **intended use** of a medical test can be diagnosis, screening, staging, monitoring, surveillance, prediction or prognosis. The **clinical role** of a test explains its position relative to existing tests in the clinical pathway. A replacement test, for example, replaces an existing test. A triage test is used before an existing test; an add-on test is used after an existing test.

Besides diagnostic accuracy, several other outcomes and statistics may be relevant in the evaluation of medical tests. Medical tests can also be used to classify patients for purposes other than diagnosis, such as staging or prognosis. The STARD list was not explicitly developed for these other outcomes, statistics, and study types, although most STARD items would still apply.

---

## DEVELOPMENT

This STARD list was released in 2015. The 30 items were identified by an international expert group of methodologists, researchers, and editors. The guiding principle in the development of STARD was to select items that, when reported, would help readers to judge the potential for bias in the study, to appraise the applicability of the study findings and the validity of conclusions and recommendations. The list represents an update of the first version, which was published in 2003.

More information can be found on <http://www.equator-network.org/reporting-guidelines/stard>.



# BMJ Open

**High-sensitivity troponin alone or in combination with copeptin seems not sensitive enough for ruling out NSTEMI in very early presenters at admission in Emergency Department: a post-hoc analysis.**

|                                 |                                                                                                                                                                                                                                                                                                                                                                                                                                                                                                                                                                                                                                                                                                                  |
|---------------------------------|------------------------------------------------------------------------------------------------------------------------------------------------------------------------------------------------------------------------------------------------------------------------------------------------------------------------------------------------------------------------------------------------------------------------------------------------------------------------------------------------------------------------------------------------------------------------------------------------------------------------------------------------------------------------------------------------------------------|
| Journal:                        | <i>BMJ Open</i>                                                                                                                                                                                                                                                                                                                                                                                                                                                                                                                                                                                                                                                                                                  |
| Manuscript ID                   | bmjopen-2018-023994.R2                                                                                                                                                                                                                                                                                                                                                                                                                                                                                                                                                                                                                                                                                           |
| Article Type:                   | Research                                                                                                                                                                                                                                                                                                                                                                                                                                                                                                                                                                                                                                                                                                         |
| Date Submitted by the Author:   | 14-Feb-2019                                                                                                                                                                                                                                                                                                                                                                                                                                                                                                                                                                                                                                                                                                      |
| Complete List of Authors:       | Chenevier-Gobeaux, Camille; Hopital Cochin, SDBA<br>Sebbane, Mustapha; Centre Hospitalier Regional Universitaire de Montpellier, Emergency Departement<br>Meune, Christophe; Avicenne University Hospital, Cardiology; Paris 13 University,<br>Lefebvre, Sophie; Centre Hospitalier Regional Universitaire de Montpellier, Emergency department<br>Dupuy, Anne-Marie; Montpellier University Hospital Centre, Department of Biochemistry<br>Lefevre, Guillaume; Hopital Tenon, Laboratoire de Biochimie et Hormonologie<br>Peschanski, Nicolas; CHU de Rouen, Service des Urgences Adultes; Institute for Biomedical Research and Innovation , INSERM U1096<br>Ray, Patrick; Hopital Tenon, Emergency Department |
| <b>Primary Subject Heading</b>: | Emergency medicine                                                                                                                                                                                                                                                                                                                                                                                                                                                                                                                                                                                                                                                                                               |
| Secondary Subject Heading:      | Diagnostics, Cardiovascular medicine, Emergency medicine                                                                                                                                                                                                                                                                                                                                                                                                                                                                                                                                                                                                                                                         |
| Keywords:                       | high sensitive cardiac troponin, non ST-elevation acute myocardial infarction, copeptin, very early presenters, chest pain onset                                                                                                                                                                                                                                                                                                                                                                                                                                                                                                                                                                                 |
|                                 |                                                                                                                                                                                                                                                                                                                                                                                                                                                                                                                                                                                                                                                                                                                  |

SCHOLARONE™  
Manuscripts

1  
2  
3 **Revised manuscript Ref: bmjopen-2018-023994\_R2**  
4  
5

6 **High-sensitivity troponin alone or in combination with copeptin seems not sensitive**  
7  
8  
9 **enough for ruling out NSTEMI in very early presenters at admission in Emergency**

10  
11 **Department: a post-hoc analysis.**  
12

13 Camille Chenevier-Gobeaux (1), Mustapha Sebbane (2), Christophe Meune (3, 4), Sophie  
14  
15 Lefebvre (2), Anne-Marie Dupuy (5), Guillaume Lefèvre (6, 7), Nicolas Peschanski (8),  
16  
17 Patrick Ray (9, 10)  
18  
19

20  
21 **Authors' affiliations**

22 (1) Service de Diagnostic Biologique Automatisé, Hôpital Cochin, Hôpitaux Universitaires  
23 Paris Centre (HUPC), Assistance Publique des Hôpitaux de Paris (AP-HP), Paris, France.  
24 [camille.gobeaux@aphp.fr](mailto:camille.gobeaux@aphp.fr)

25 (2) Département des Urgences, Hôpital Lapeyronie, CHU de Montpellier, Montpellier, France.  
26 [m-sebbane@chu-montpellier.fr](mailto:m-sebbane@chu-montpellier.fr) ; [s-lefebvre@chu-montpellier.fr](mailto:s-lefebvre@chu-montpellier.fr)

27 (3). Service de Cardiologie, Hôpital Avicenne, Hôpitaux Universitaires Paris Seine Saint  
28 Denis, Assistance Publique des Hôpitaux de Paris (AP-HP), Bobigny; Université Paris 13,  
29 Paris, France. [christophe.meune@aphp.fr](mailto:christophe.meune@aphp.fr)

30 (4) INSERM UMR S-942, Paris, France

31 (5) Département de Biochimie, Hôpital Lapeyronie – CHU Montpellier - MONTPELLIER  
32 France. [am-dupuy@chu-montpellier.fr](mailto:am-dupuy@chu-montpellier.fr)

33 (6) Laboratoire de Biochimie et Hormonologie, Hôpital Tenon, Hôpitaux Universitaires Est  
34 Parisien, Assistance Publique des Hôpitaux de Paris (AP-HP), Paris, France.  
35 [guillaume.lefevre@aphp.fr](mailto:guillaume.lefevre@aphp.fr)

36 (7) Sorbonne Universités UPMC-University Paris06, GRC-14 BIOSFAST, Paris.

37 (8) Urgences-SMUR, Centre Hospitalier Eure-Seine - Hôpital d'Evreux, Rue Léon  
38 Schwartzberg, 27015 Évreux, France. [n.peschanski@neuf.fr](mailto:n.peschanski@neuf.fr)

39 (9) Centre Régional Universitaire des Urgences, Hôpital François Mitterrand, 5 Boulevard  
40 Jeanne d'Arc, 21000 Dijon, France. [patrick.ray@chu-dijon.fr](mailto:patrick.ray@chu-dijon.fr).

41 (10) Université de Bourgogne, Dijon, France.  
42  
43  
44

45  
46 **Correspondance:**

47 Camille Chenevier-Gobeaux, Service de Diagnostic Biologique Automatisé, Hôpital Cochin,  
48 Hôpitaux Universitaires Paris Centre, Assistance Publique des Hôpitaux de Paris (AP-HP), 27  
49 rue du Fbg St Jacques, 75679 Paris cedex 14, France. Tel : +33 1 58 41 19 16. Fax : + 33 1 58  
50 41 31 84. Mail: [camille.gobeaux@aphp.fr](mailto:camille.gobeaux@aphp.fr)  
51  
52  
53

54 **Keywords:** high sensitive cardiac troponin, chest pain, non ST-elevation acute myocardial  
55  
56 infarction, copeptin, very early presenters, chest pain onset.  
57  
58  
59  
60



## Abstract

**Objectives:** Copeptin and high-sensitivity cardiac troponin (HS-cTn) assays improve the early detection of NSTEMI. Their sensitivities may however be reduced in very early presenters.

**Setting:** We performed a post-hoc analysis of three prospective studies that included patients who presented to the Emergency Department for chest pain onset (CPO) of less than 6 hours.

**Participants:** 449 patients were included, in whom 12% had NSTEMI. CPO occurred <2h from ED presentation in 160, between 2-4h in 143, and >4h in 146 patients. The prevalence of NSTEMI was similar in all groups (9%, 13% and 12%, respectively,  $p=0.281$ ). **Measures:** Diagnostic performances of HS-cTn and copeptin at presentation were examined according to CPO. The discharge diagnosis was adjudicated by 2 experts, including cTnI. HS-cTn and copeptin were blindly measured. **Results:** Diagnostic accuracies of cTnI, cTnI+copeptin and HS-cTnT (but not HS-cTnT+copeptin) lower through CPO categories. For patients with CPO<2h, the choice of a threshold value of 14 ng/L for HS-cTnT resulted in 3 false negative (Sensitivity 80% [95%CI: 51-95]; specificity 85% [78-90]; 79% of correctly ruled-out patients) and that of 5 ng/L in 2 false negative (Sensitivity 87% [59-98]; specificity 58% [50-66]; 52% of correctly ruled-out patients). The addition of copeptin to HS-cTnT induced a decrease of misclassified patients to 1 in patients with CPO<2h (Sensitivity 93% [66-100]; specificity 41% [33-50]). **Conclusion:** A single measurement of HS-cTn, alone or in combination with copeptin at admission, seems not safe enough for ruling out NSTEMI in very early presenters (with CPO<2h). **Trial registrations:** French Health Ministry (no. DC-2009-1052), French Local Ethic comity « Comité de Protection des Personnes Ile-de-France » III (Hôpital Cochin) et VI (CHU Pitié-Salpêtrière).

### Strengths

- Focus on very early chest pain presenters that was not performed before

### Limitations of our study

- Small numbers of very early chest pain presenters, although the data grouping of 3 previous studies
- A single measurement of troponin at admission was considered for the analysis, but not its kinetics
- The gold standard diagnosis was based on a non-HS cTn.

## Introduction

The management of patients with acute chest pain at the Emergency Department (ED) is a major health problem and an adequate ruling out process for non-ST elevation acute myocardial infarction (NSTEMI) is crucial. Cardiac troponin (cTn) measurement with conventional assays and more recent high-sensitivity cardiac troponin assays (HS-cTn), are current diagnostic tools for the assessment of these patients (1). The European Society of Cardiology guidelines proposed a rapid rule-out strategy using low HS-cTn values (i.e. values below the Limit of Detection of the assay -LoD-) as decisional threshold for ruling out NSTEMI (1). The accuracy of a rapid 0-hour/1-hour algorithm has also been recently demonstrated in patients with CPO<6h (2) and is endorsed by the latest ESC guidelines (1). In this analysis, the authors indicated that using a single HS-cTnT cutoff value of 14 ng/L at presentation resulted in 88.7% sensitivity and 97.3% negative predictive value (NPV), but that this single assay strategy was less effective than the combination of absolute level of HS-cTnT measured at presentation and again at 1 hour, combined with the absolute difference between the two levels (2).

However, in very early presenters, such rapid and efficient triage at presentation may be uncertain (3). Indeed, very early presenters, defined as having chest pain <2h, are considered by some authors as highly vulnerable as they may not present all symptoms and signs and thus be exposed to a higher risk of misdiagnosis and therefore worse outcome (4); the application of a rapid algorithm to these patients may lead to early discharge within 3 hours from ED admission. Recently, a meta-analysis (based on eleven studies) indicated that a single HS-cTnT concentration below the limit of detection may successfully rule out AMI (5). However, concerns have been raised about the safety of a single measurement rule out protocol performed at presentation in early presenters (6,7).

1  
2  
3 Copeptin (in association with cTn) assays improve the early detection of NSTEMI (8–12).

4  
5 Indeed, a randomized controlled trial demonstrated the safety of early discharge using a single  
6  
7 combination of copeptin + cTn at presentation for patients with CPO <6h (13).

8  
9  
10 The present study aimed to assess the diagnostic performance of HS-cTn and copeptin as a  
11  
12 single measurement at admission in very early ED presenters with suspected NSTEMI.  
13  
14  
15  
16  
17  
18  
19  
20  
21  
22  
23  
24  
25  
26  
27  
28  
29  
30  
31  
32  
33  
34  
35  
36  
37  
38  
39  
40  
41  
42  
43  
44  
45  
46  
47  
48  
49  
50  
51  
52  
53  
54  
55  
56  
57  
58  
59  
60

For peer review only

## Patients and methods

### *Study design and population*

The study is a *post-hoc* analysis of three French prospective clinical studies (already published) of cardiac biomarker testing, each to explore the usefulness of copeptin and/or HS-cTnT testing in patients who presented to the ED with acute chest pain of less than 6h (14,15). However, none of these studies evaluated the influence of CPO value on diagnostic performances. All three trials had comparable inclusion/exclusion criteria and gathered similar clinical information (Table 1). Patients requiring renal replacement therapy were excluded. All studies received approval from local Institutional Review Board. The study complied with the principles of the Declaration of Helsinki. Recommendations of the Standards for Reporting of Diagnostic Accuracy (STARD) initiative were applied (16).

### *Patient Involvement*

The development of the research question was not informed by patients. Patients were not involved in the design of this study. Patients were not involved in the recruitment to and conduct of the study. There was no results dissemination to study participants.

### *Routine assessment*

All patients underwent an initial clinical evaluation (including clinical history, physical examination, 12-lead ECG, pulse oximetry, routine blood tests, and chest X-ray). Conventional cardiac Troponin I (cTnI) was measured on a venous blood collection performed at presentation and, if required, repeated after 3 to 9 h, as clinically indicated (17). The onset of chest pain (CPO), defined as the delay from symptom onset to presentation was recorded, based on patient history/declaration. When history was incomplete or inconsistent, CPO was not recorded and patient was excluded of the analysis (see flow chart, Figure 1).

1  
2  
3 Based on all clinical, biological (including cTnI value, but not HS-cTnT and copeptin values  
4 which were blindly measured) and imaging results, a decision was made by the attending  
5 physician to admit or discharge the patient, as well as medical therapy and revascularization if  
6 indicated. Attending emergency physicians and cardiologists were blinded to the results of  
7 HS-cTnT and copeptin, and biologists were blinded to the suspected diagnosis at presentation.  
8 Patients with no cTnI results and/or no recorded CPO value, and patients with a final  
9 diagnosis of STEMI, were excluded (see flowchart, Figure 1).  
10  
11  
12  
13  
14  
15  
16  
17  
18  
19  
20

### 21 ***Gold standard diagnosis***

22  
23 The gold standard diagnosis was adjudicated by two independent experts (emergency  
24 physician and cardiologist) who reviewed all available medical records (including patient  
25 history, physical findings, laboratory results including cTnI value and radiologic testing, ECG,  
26 echocardiography, cardiac exercise test, coronary angiography, summary chart at discharge)  
27 pertaining to the patient from the time of ED presentation to 30-day follow-up. Experts were  
28 blind to copeptin and HS-cTnT results. In the event of diagnostic disagreement, cases were  
29 reviewed and adjudicated in conjunction with a third expert.  
30  
31  
32  
33  
34  
35  
36  
37  
38  
39

40 AMI was diagnosed according to the universal definition that was in force at the time of  
41 inclusions and adapted to the use of a conventional cTn (18). Thus, patients with a cTnI  
42 increase (or a rise/fall pattern) above the 10%CV threshold, associated with at least one of the  
43 following: symptoms of myocardial ischemia, new ST-T changes or new Q wave on ECG,  
44 imaging of new loss of viable myocardium, or normal cTnI on admission, were classified as  
45 having an MI (STEMI with a ST elevation in at least 2 continuous leads on ECG or new onset  
46 of left bundle branch block, or NSTEMI). STEMI patients were excluded from the analysis,  
47 based on ST elevation observed on the ECG (see Flow chart, Fig. 1). Patients were classified  
48  
49  
50  
51  
52  
53  
54  
55  
56  
57  
58  
59  
60

1  
2  
3 according to the CPO, <2h, from 2-4h and >4h; those with a CPO <2 hours were considered  
4  
5 as very early presenters.  
6

7 Unstable angina (UA) diagnosis was adjudicated in patients with history or clinical symptoms  
8  
9 consistent with ACS but without ST-T changes on the ECG and without change of cTn on  
10  
11 serial testing. Other diagnostic categories beside NSTEMI and UA were non-ACS (e.g., stable  
12  
13 angina, myocarditis, arrhythmias, heart failure, pulmonary embolism, and chest pain of  
14  
15 unknown origin). UA and non-ACS chest pain were considered as non-NSTEMI in our  
16  
17 analysis.  
18  
19  
20  
21  
22

### 23 ***Troponin measurements***

24  
25 Plasma cTnI concentrations were routinely measured on an X-pand® HM analyzer, using the  
26  
27 Cardiac Troponin-I immunoassay (Siemens Healthcare Diagnostics Inc., Newark, CT) in two  
28  
29 EDs (Cochin and La Pitié Salpêtrière Hospitals). The limit of detection (LoD) was 0.04 µg/L  
30  
31 (40 ng/L). The limit of quantitation (LoQ), i.e. the 10% imprecision point (or 10% CV),  
32  
33 which is the lowest cTn concentration that can be reproducibly measured with a between-run  
34  
35 CV of ≤10%, was 0.14 µg/L (140 ng/L). The 99<sup>th</sup> percentile of the assay was 0.07 µg/L (70  
36  
37 ng/L), with coefficients of variations (CV) between 15 to 22 %. The measuring range was  
38  
39 0.04 to 40 µg/L (40 to 40,000 ng/L), and the imprecision values across the measuring range  
40  
41 were below 10%.  
42  
43  
44  
45  
46

47 In Bicêtre and in Montpellier hospitals, plasma cTnI concentrations were routinely measured  
48  
49 on an Access® analyser (Beckman Coulter, Inc., Brea, CA). According to the manufacturer's  
50  
51 data, the limit of detection (LoD) was 0.01 µg/L (10 ng/L), the 20% point on the imprecision  
52  
53 curve was 0.02 µg/L (20 ng/L). The LoQ/10%CV was 0.04 µg/L (40 ng/L). The 99<sup>th</sup>  
54  
55 percentile of the assay was 0.04 µg/L (40 ng/L). The measuring range was 0.01 to 100 µg/L  
56  
57 (10 to 100,000 ng/L), and the imprecision values across the measuring range were below 10%.  
58  
59  
60

1  
2  
3 After routine cTnI measurement, plasma samples were aliquoted and frozen (-40°C) until HS-  
4 cTnT and copeptin measurement.  
5

6  
7 Hs-cTnT was measured in heparinized collected samples, on an Elecsys2010® analyser  
8 (Roche Diagnostics, Meylan, France). The limit of blank (LoB) \*was 3 ng/L, the LoD was 5  
9 ng/L, and the 99<sup>th</sup> percentile was 14 ng/L. The measuring range was 3 to 10,000 ng/L. In our  
10 laboratory, CVs obtained in Roche quality controls containing 27.5 and 2,360 ng/L of cTnT  
11 were 3.6 and 2.8 % (between-run precision) and 1.4 and 0.4 % (within-run precision). Of note,  
12 the LoD is measured with a between-run CV of >10%, while the 99<sup>th</sup> percentile is a precise  
13 concentration (CV<10%) (7). HS-cTnT determinations were performed blinded to the clinical  
14 assessment of the emergency physicians.  
15  
16  
17  
18  
19  
20  
21  
22  
23  
24  
25  
26  
27

### 28 ***Copeptin measurement***

29  
30 Copeptin was measured in heparinized blood samples collected on admission. The assay was  
31 performed on a KRYPTOR® analyser using ThermoFisher Scientific sandwich  
32 immunoluminometric assay (B.R.A.H.M.S Copeptin KRYPTOR, B.R.A.H.M.S  
33 Aktiengesellschaft, Hennigsdorf, Germany). The assay principle is based on TRACE  
34 technology (Time-Resolved Amplified Cryptate Emission). The lower detection limit is 4.8  
35 pmol/L, and the functional assay sensitivity (20%CV value) is <12 pmol/L (data from  
36 manufacturer, recommended threshold value for this method). Copeptin determinations were  
37 performed blinded to the clinical assessment of the emergency physicians.  
38  
39  
40  
41  
42  
43  
44  
45  
46  
47  
48  
49  
50

### 51 ***Statistical analysis***

52  
53 Continuous variables are presented as means ± SD, and categorical variables are expressed as  
54 numbers (percentage). Continuous variables were compared by using the Kruskal-Wallis test,  
55 and categorical variables were assessed using Pearson's  $\chi^2$  test. Number of misclassified  
56  
57  
58  
59  
60



1  
2  
3 patients and number of correctly ruled-out patients were collected for each threshold strategy,  
4  
5 and correspond to the false negative and the true positive patients, respectively.  
6

7 Receiver operating characteristic (ROC) curves were constructed to assess the sensitivity and  
8  
9 specificity, positive predictive value (PPV) and negative predictive value (NPV) throughout  
10  
11 the concentrations of cTnI, HS-cTnT and copeptin for the diagnosis of NSTEMI, and  
12  
13 according to the CPO. cTn and copeptin values were log-transformed before combination for  
14  
15 ROC analysis. For cTnI values, as they were obtained from two non-standardized methods,  
16  
17 values were normalized by factorizing to the 99th percentile of the method prior to ROC  
18  
19 analysis in order to remove any bias due to methodological differences.  
20  
21  
22

23  
24 Diagnostic thresholds that were used for classification of the data are:

- 25  
26 - For cTnI, the LoQ values: 0.04 µg/L (40 ng/L) for Bicêtre and Montpellier hospitals,  
27  
28 0.14 µg/L (140 ng/L) for other sites,  
29
- 30 - For HS-cTnT, The LoB (3 ng/L), the LoD (5 ng/L) and the 99<sup>th</sup> percentile (14 ng/L),  
31  
32
- 33 - For copeptin, the manufacturer's recommended threshold at 12 pmol/L.  
34

35 All data are presented with their 95% confidence intervals [95%CI]. All hypothesis testing  
36  
37 was two-tailed, and  $p < 0.05$  was considered statistically significant. Statistical analysis was  
38  
39 performed using MedCalc (MedCalc Software, Version 12.4.0.0, Mariakerke, Belgium).  
40  
41  
42  
43  
44  
45  
46  
47  
48  
49  
50  
51  
52  
53  
54  
55  
56  
57  
58  
59  
60

## Results

### *Characteristics of the studied population*

Table 2 shows the characteristics of the studied population. Briefly, in the total cohort mean age was  $58 \pm 17$  years, and included more males. A gold standard diagnosis of NSTEMI was adjudicated in 55 patients (12%). Delay from chest pain onset to ED admission was  $<2$  hours in 160 (36%) patients, was from 2 to 4 hours in 143 (32%) and was  $>4$  hours (and below 6 hours) in 146 (32%) patients. Very early presenters with NSTEMI ( $n=15$ ) tended to be older than those without NSTEMI ( $n=145$ ) (65 vs. 55 years-old), were more frequently hospitalized (93% vs. 58%), and also more frequently underwent diagnostic coronary angiography (73% vs. 27%).

### *Diagnostic performances according to CPO*

ROC curves of cTn for the diagnosis of NSTEMI, alone or in combination with copeptin are presented in Figure 2. Diagnostic accuracies of cTnI, cTnI+copeptin and HS-cTnT are reduced when time to onset of chest pain gets less, as indicated by estimated AUCs and their 95%CI intervals (Table 3). The AUCs of HS-cTnT+copeptin were not different through the CPO categories.

Diagnostic performances of cTn, alone or in combination with copeptin, and using different decisional thresholds, are presented in Table 4.

In very early presenters (CPO  $<2$  hours), a single value of cTnI alone had low sensitivity (73 [73-91] %) but high specificity (97 [92-99]%), and misclassified 4 of 15 NSTEMI patients. However, this strategy could correctly rule-out 141 patients (88%). Combining copeptin with cTnI increases sensitivity, and lowers the number of misdiagnosed patients from 4 to 2, but significantly lowers the rate of ruled-out patients from 88% to 54% (Table 4). Of note, addition of copeptin also significantly lowered specificity. At a threshold of 14 ng/L, HS-

1  
2  
3 cTnT had low sensitivity (80 [59-98] %), misclassified 3 NSTEMI patients but could  
4 correctly rule-out 123 (79%) patients, which is less than using cTnI. The sensitivity of HS-  
5  
6  
7  
8  
9  
10  
11  
12  
13  
14  
15  
16  
17  
18  
19  
20  
21  
22  
23  
24  
25  
26  
27  
28  
29  
30  
31  
32  
33  
34  
35  
36  
37  
38  
39  
40  
41  
42  
43  
44  
45  
46  
47  
48  
49  
50  
51  
52  
53  
54  
55  
56  
57  
58  
59  
60

cTnT had low sensitivity (80 [59-98] %), misclassified 3 NSTEMI patients but could correctly rule-out 123 (79%) patients, which is less than using cTnI. The sensitivity of HS-TnT alone is likely to be suboptimal in early presenters, but can be improved by using a lower threshold for positivity or adding copeptin (but this is accompanied with a marked loss of specificity). The addition of copeptin induced a decrease in misclassified patients from 2 to 1, either with an HS-cTnT threshold at 14 or at 5 ng/L. This ultimate misdiagnosed NSTEMI patient with CPO <2h who presented with all undetectable biomarkers was a 44-years old woman with a history of smoking and no CV risk factors; the CPO was 45 min before hospital admission (Table 5).

In patients with CPO 2-4 hours, results are similar to those observed in very early presenters, although the number of misclassified patients was different (Table 4). Adding copeptin to cTnI induced a decrease of misclassified patients from 5 to 1 for an HS-cTnT threshold at 14 ng/L, and from 2 to 0 for an HS-cTnT threshold at 5 ng/L. In particular, combining copeptin to the LoD (5 ng/L) of HS-cTnT reached 100% sensitivity of the test. Similar performance was observed using the LoB (3ng/L) of HS-cTnT. Indeed, all NSTEMI patients with CPO 2-4 h had a detectable HS-cTnT and/or an elevated copeptin. In this sub-group again, the use of copeptin lowered significantly the specificity of the test.

As expected, in patients with CPO >4 hours, all patients had quantitative cTnI and detectable HS-cTnT. No patient was misclassified. The addition of copeptin in this sub-group had no effect on sensitivity or misclassified patients.

### ***Potential misdiagnosed NSTEMI***

Characteristics of potential misdiagnosed NSTEMI patients are detailed in Table 5. All potentially missed NSTEMI in the very early presenters population had a CPO <1 hour. We found no distinguishing characteristics in misclassified patients when comparing to correctly

1  
2  
3 diagnosed patients in terms of age, sex, and cardiovascular risks, in each CPO category. Of  
4  
5 note, when STEMI patients were included in our analysis, results were comparable (data not  
6  
7 shown).  
8  
9  
10  
11  
12  
13  
14  
15  
16  
17  
18  
19  
20  
21  
22  
23  
24  
25  
26  
27  
28  
29  
30  
31  
32  
33  
34  
35  
36  
37  
38  
39  
40  
41  
42  
43  
44  
45  
46  
47  
48  
49  
50  
51  
52  
53  
54  
55  
56  
57  
58  
59  
60

For peer review only

## Discussion

Our results indicate that diagnostic performances of HS-cTnT values at admission, alone or combined with copeptin, are reduced in the subgroup of patients with shorter CPO. Emergency physicians may not rule out NSTEMI in very early presenters with a single low value of HS-cTnT and/or copeptin at presentation.

Our studied population included one third of early presenters, and this proportion is similar to that found by Boeddinghaus et al (26% of patients presented within 2h from CPO) (4), by Keller et al (37% and 38% of patients with CPO<3h, (8,19)), and by Reichlin et al. (222 patients with CPO<3h out of 718, i.e. 31%) (20). More recently, Stallone et al reported 519 (26%) patients that arrived within 2 hours of symptom onset to the ED (6), and Twerenbold et al. reported the largest subgroup investigated so far with 1,322 early presenters (with CPO<3h) out of 4,368, i.e. 30% (21). This may reflect that our study was performed in large urban areas equipped with pre-hospital emergency ambulances. A more prolonged delay might be expected in more rural regions. The exact definition of very early presenters is still a matter of debate. Authors nevertheless agree to define them as presenting before 2h (20). Very few studies examined the specific groups of early/very early presenters (4,6,8,20) In the ESC guidelines, a different strategy is recommended for patients with versus without CPO<6h (0/3h-algorithm) (1). Earlier presenters are taken into account in the 0/1h-algorithm, but in this strategy the rapid exclusion with a unique measurement at admission (H0) is only applicable if CPO>3h (1). We believe that this proportion is not negligible and the impact of this very early population might be underestimated in studies where the CPO is not evaluated.

We observed that AUCs of cTnI, cTnI+copeptin and HS-cTnT were significantly lower when CPO<4h. The NPVs were not significantly impacted by the CPO, but a suboptimal sensitivity and a non-negligible proportion of misclassified NSTEMI was observed in patients with CPO<2h for all tested thresholds and combinations, even if cTnI and HS-cTnT performances

1  
2  
3 can be improved by using a lower threshold for positivity or adding copeptin. The same was  
4 true for patients with CPO 2-4h, except when using the combination of HS-cTnT <5 ng/L and  
5  
6 true for patients with CPO 2-4h, except when using the combination of HS-cTnT <5 ng/L and  
7  
8 copeptin <12  $\mu$ mol/L. We reported the number of misclassified patients in addition to  
9  
10 sensitivity and NPV, because NPV is known to be dependent of the prevalence, thus its value  
11  
12 might be biased. The absolute number of misdiagnosed patients might be more clinically  
13  
14 pertinent than NPV (22).

15  
16  
17 As previously suggested (1), we found that sensitivity and NPV of a single measurement of  
18  
19 HS-cTn at admission seems not safe enough to exclude a NSTEMI in very early presenters.  
20  
21 We here show that lowering HS-cTn decisional threshold to LoD or to LoB is not sufficient to  
22  
23 detect all NSTEMI among very early chest pain presenters. Although combining copeptin to  
24  
25 HS-cTnT increased sensitivity and lowered number of misclassified patients, none of the  
26  
27 tested strategies allowed for identification of all NSTEMI. Results obtained in very early  
28  
29 presenters were very similar to patients with CPO 2-4h, except that in this later sub-group  
30  
31 combining copeptin with HS-cTnT succeeded in significantly increasing sensitivity (all  
32  
33 NSTEMI patients had a detectable HS-cTnT and/or an elevated copeptin).

34  
35  
36  
37 Our results can be compared to those of Boeddinghaus et al. who found that sensitivity of a  
38  
39 single HS-cTn measurement is lower in very early presenters, in comparison to all patients (4).  
40  
41 These authors indicated that using a single cut-off approach, 61% of the very early presenters  
42  
43 were ruled-out, which resulted in a sensitivity of 94% and a NPV of 98%. They conclude that  
44  
45 the single cutoff strategy should not be applied in early presenters. However, the authors did  
46  
47 not evaluate the impact of copeptin across CPO categories. In another study, the same authors  
48  
49 indicated that the additional use of copeptin did not sufficiently improve diagnostic accuracy  
50  
51 in early presenters (23). Here again, our results are in accordance with those of Boeddinghaus  
52  
53 indicating that copeptin did not improve diagnostic accuracy of hs-cTnI at presentation in  
54  
55 early presenters (23). Mueller et al showed, using the rapid 0-hour/1-hour algorithm that 63%

1  
2  
3 patients with CPO<6h were classified as rule-out. However, 7 patients were missed (0.9%  
4 rate), in whom 3 had HS-cTnT<LoD at presentation and at 1 hour (2). Moreover, a single  
5 cutoff value for HS-cTnT at 14 ng/L at presentation resulted in a sensitivity of 88.7% and a  
6 NPV of 97.3%, and performed less adequately than the combination of HS-cTnT at  
7 presentation with 1-hour level and 1-hour absolute change (2). In a more recent study,  
8 Mokhtari et al. evaluated a rapid 0H/1H protocol for discharge chest pain patients based on a  
9 single value <LoD at admission (24). These authors found 2 missed patients in their  
10 population, and recognize that the safety of such rapid protocol is not clear in very early  
11 presenters. They further recommend additional HS-cTnT testing at 3 hours for very early  
12 presenters (24).

13  
14 Performance of cardiac troponins, although measured using HS assays, might be limited in  
15 very early presenters because of their kinetics of release into the blood circulation (8). The  
16 release of cTn into the circulation following cardiomyocyte damage is a time-dependent  
17 phenomenon (25), and a single measurement approach may fail at identifying AMI very early  
18 after the onset of symptoms (26). Indeed we, like other authors, found very early presenters  
19 with undetectable HS-cTnT at admission. Time-dependent release of copeptin during AMI  
20 has been described earlier, and this biomarker has been considered as an early biomarker (8).  
21 Copeptin increases immediately after induction of ischemia, and peaks 90 min after (27).  
22 However, some authors recently indicated that copeptin kinetics might be different in  
23 NSTEMI in comparison to STEMI, and that if copeptin is increased at first medical contact in  
24 the ambulance, the circulating concentrations may rapidly decrease down to normal ranges at  
25 the time of hospital admission (28). Our results are in accordance with this observation, as we  
26 found one misdiagnosed NSTEMI very early presenter with non-elevated copeptin.

27  
28 Lastly, our results are reinforced by those of Stallone et al who found that the additional use  
29 of copeptin did not increase diagnostic accuracy in very early presenters (6). Furthermore, the  
30  
31  
32  
33  
34  
35  
36  
37  
38  
39  
40  
41  
42  
43  
44  
45  
46  
47  
48  
49  
50  
51  
52  
53  
54  
55  
56  
57  
58  
59  
60

1  
2  
3 NPV for the combination of HS-cTnT and copeptin was lower in patients arriving in the first  
4  
5 2 hours than in those arriving after 2 hours (6). However, these authors did not evaluate the  
6  
7 LoD nor LoB of HS-cTnT in their work. We here report that even when lowering the cutoff of  
8  
9 HS-cTnT, the combination of HS-cTnT and copeptin seems not enough to detect all NSTEMI  
10  
11 among all very early presenters. Our study and the one of Stallone et al. (6) are in accordance  
12  
13 with previous studies that have shown that there is no or marginal benefit when adding  
14  
15 copeptin to HS-cTn assays; indeed, Wildi et al. indicated that copeptin provides no significant  
16  
17 increase in AUC when combined to HS-cTn (29), either in their all population or in patients  
18  
19 with CPO<4h. These authors found an incremental value in sensitivities, NPV and calculating  
20  
21 the integrated discrimination improvement index (IDI), but they did not evaluated low HS-  
22  
23 cTn thresholds such as LoB and LoD values (29).

24  
25  
26  
27  
28 Of note, all patients with CPO >4 hours had detectable cTnI and HS-cTnT, i.e. the use of  
29  
30 copeptin in this situation added no gain. Other studies reported that copeptin testing for the  
31  
32 rule out of NSTEMI should be limited to CPO< 6 hours (1,13). According to our data, the  
33  
34 added value of copeptin might be more restricted, but further studies are needed to confirm  
35  
36 our findings.

37  
38  
39  
40 The current ESC guidelines incorporate an additional criterion for direct rule-out of patients  
41  
42 that are not very early presenters; indeed, the rapid rule-out using a single measurement at  
43  
44 admission is possible only if CPO is >3h (1). Furthermore, this rapid algorithm can be used  
45  
46 only for 3 HS-cTn assays, including HS-cTnT. Considering our data about patients with CPO  
47  
48 >4h, we note that our conclusions are in line with the recommendations. Therefore, the use of  
49  
50 a single measurement at admission might be used for a safe rule-out in patients that are not  
51  
52 very early presenters. The alternative rule-out criteria, combining baseline concentration and  
53  
54 1h-change, should be used in early presenters.  
55  
56  
57  
58  
59  
60



### Limitations of our study

First, it is a post-hoc analysis of three previously published studies, and some data are missing (vital signs at admission, details in ECG findings for example). Second, only a single measurement of troponin at admission was considered for this analysis, and we did not evaluate its kinetics; we therefore cannot comment on the accuracy of the recent 1h algorithm in our population (1,2). Third, different cTn assays were used across the different centers (11–13) and we had to normalize cTnI values before analysis in order to minimize bias. However, all centers evaluated the same HS-cTnT and copeptin. Fourth, as the gold standard diagnosis was based on a non-HS cTn, we recognize that this could result in underdiagnosis of myocardial injury. Previous studies have shown that an early rule-out of NSTEMI using hs-cTn alone, also in the vulnerable subgroup of early presenters, is safe (with high AUC, sensitivities and NPV in patients presenting with CPO<3h) (20). In our study, the combined biomarkers are not safe-enough for early rule-out of NSTEMI in patients presenting very early (CPO<2h). The fact that gold standard diagnoses were adjudicated by the use of a conventional but not a hs-cTn assay, and that different assays were used, may have led to underdiagnose patients. This point limits the generalizability of our findings and explains why sensitivities and NPVs were much lower as compared to previous studies. However, our results are comparable to those of Stallone et al how recently used an HS-cTn, as suggested by our AUC (0.85[95%CI : 0.79-0.90]) in comparison to those of Stallone (0.86 [95%CI:0.82-.090]) (6). However, the aim of our work is not to evaluate another time global HS-cTn accuracy, but to highlight CPO effects on diagnostic accuracy of HS-cTn combined or not to copeptin. Fifth, we examined 3 subgroups with CPO<2h, 2-4h and 4h and defined very early presenters as those having CPO <2 hours, as based on the accepted definition of early presenters (20). Even if very early presenters represent more than one third of the studied population, the number of very early presenters (CPO<2h) is relatively small,

1  
2  
3 although data from three cohorts was used. This explains why false rule-out of 3 patients  
4  
5 results in a significant drop in sensitivity and NPV. Many previous studies investigated the  
6  
7 rule-out performance in early presenters using e.g. the LoD of hs-cTnT and hs-cTnI and found  
8  
9 much higher sensitivities and NPVs. This can be explained due to a larger number of patients  
10  
11  
12 (4, 20).  
13

## 14 **Conclusion**

15  
16 A single measurement of HS-cTnT alone or in combination with copeptin at admission seems  
17  
18 not sensitive enough to safely rule out NSTEMI in very early presenters (chest pain onset < 2  
19  
20 hours from ED admission). If other studies confirm our findings, another strategy to safely  
21  
22 exclude NSTEMI in this specific population that represents one third of chest pain patients is  
23  
24 warranted.  
25  
26  
27  
28  
29  
30  
31

## 32 **Acknowledgments**

33  
34 The authors would like to thank again the nursing, technical and medical staff at the  
35  
36 emergency departments and biochemistry laboratories for their assistance throughout the  
37  
38 original studies.  
39

40  
41 Reagents for the Kryptor<sup>®</sup> Compact Plus and HS-cTnT assays used for the 3 studies were  
42  
43 kindly provided by ThermoFisher Scientific and Roche Diagnostic, France, respectively.  
44  
45  
46  
47  
48  
49

## 50 **Figure legends:**

51  
52 **Figure 1:** Flow chart of the studied population.

53  
54  
55 **Figure 2:** ROC curves of cTn for the diagnosis of NSTEMI, alone or in combination with  
56  
57 copeptin. A, CPO<2h; B, CPO 2-4h; C. CPO >4h.  
58  
59  
60

**Contributorship statement:**

PR, CM, MS, and NP contributed to the design and inclusions. CCG, SL, AMD and GL realized sample collections and biomarker measurements. CCG and PR realized statistical analysis. All authors approved the final manuscript. ThermoFisher Scientific and Roche Diagnostic provided reagents.

**Competing interests:**

CCG, PR and CM received honorarias and lecture fees from Roche Diagnostics and Thermofisher Scientific.

**Funding:**

None

**Data sharing statement:**

No data sharing

## References

1. Roffi M, Patrono C, Collet J-P, Mueller C, Valgimigli M, Andreotti F, et al. 2015 ESC Guidelines for the management of acute coronary syndromes in patients presenting without persistent ST-segment elevation: Task Force for the Management of Acute Coronary Syndromes in Patients Presenting without Persistent ST-Segment Elevation of the European Society of Cardiology (ESC). *Eur Heart J*. 2016;37(3):267-315.
2. Mueller C, Giannitsis E, Christ M, Ordóñez-Llanos J, deFilippi C, McCord J, et al. Multicenter Evaluation of a 0-Hour/1-Hour Algorithm in the Diagnosis of Myocardial Infarction With High-Sensitivity Cardiac Troponin T. *Ann Emerg Med*. 2016;68(1):76-87.e4.
3. Wildi K, Nelles B, Twerenbold R, Rubini Giménez M, Reichlin T, Singeisen H, et al. Safety and efficacy of the 0 h/3 h protocol for rapid rule out of myocardial infarction. *Am Heart J*. 2016;181:16-25.
4. Boeddinghaus J, Nestelberger T, Twerenbold R, Wildi K, Badertscher P, Cupa J, et al. Direct Comparison of Four Very Early Rule-Out Strategies for Acute Myocardial Infarction Using High-Sensitivity Cardiac Troponin I. *Circulation*. 2017;135(17):1597-1611
5. Pickering JW, Than MP, Cullen L, Aldous S, Ter Avest E, Body R, et al. Rapid Rule-out of Acute Myocardial Infarction With a Single High-Sensitivity Cardiac Troponin T Measurement Below the Limit of Detection: A Collaborative Meta-analysis. *Ann Intern Med*. 2017;166(10):715-724.
6. Stallone F, Schoenenberger AW, Puelacher C, Rubini Gimenez M, Walz B, Naduvilekoot Devasia A, et al. Incremental value of copeptin in suspected acute myocardial infarction very early after symptom onset. *Eur Heart J Acute Cardiovasc Care*. 2016;5(5):407-15.
7. Chenevier-Gobeaux C, Lefevre G, Bonnefoy-Cudraz E, Charpentier S, Dehoux M, Meune C, et al. Why a new algorithm using high-sensitivity cardiac troponins for the rapid

1  
2  
3 rule-out of NSTEMI is not adapted to routine practice. *Clin Chem Lab Med*.  
4  
5 2016;54(10):e279-280.  
6

7  
8 8. Keller T, Tzikas S, Zeller T, Czyz E, Lillpopp L, Ojeda FM, et al. Copeptin improves  
9  
10 early diagnosis of acute myocardial infarction. *J Am Coll Cardiol*. 2010;55(19):2096-106.  
11

12  
13 9. Reichlin T, Hochholzer W, Stelzig C, Laule K, Freidank H, Morgenthaler NG, et al.  
14  
15 Incremental value of copeptin for rapid rule out of acute myocardial infarction. *J Am Coll*  
16  
17 *Cardiol*. 2009;54(1):60-8.  
18

19  
20 10. Lipinski MJ, Escárcega RO, D'Ascenzo F, Magalhães MA, Baker NC, Torguson R, et  
21  
22 al. A systematic review and collaborative meta-analysis to determine the incremental value of  
23  
24 copeptin for rapid rule-out of acute myocardial infarction. *Am J Cardiol*. 2014;113(9):1581-  
25  
26 91.  
27

28  
29 11. Raskovalova T, Twerenbold R, Collinson PO, Keller T, Bouvaist H, Folli C, et al.  
30  
31 Diagnostic accuracy of combined cardiac troponin and copeptin assessment for early rule-out  
32  
33 of myocardial infarction: a systematic review and meta-analysis. *Eur Heart J Acute*  
34  
35 *Cardiovasc Care*. 2014;3(1):18-27.  
36

37  
38 12. Chenevier-Gobeaux C, Freund Y, Claessens Y-E, Guérin S, Bonnet P, Doumenc B, et  
39  
40 al. Copeptin for rapid rule out of acute myocardial infarction in emergency department. *Int J*  
41  
42 *Cardiol*. 2013;166(1):198-204.  
43

44  
45 13. Möckel M, Searle J, Hamm C, Slagman A, Blankenberg S, Huber K, et al. Early  
46  
47 discharge using single cardiac troponin and copeptin testing in patients with suspected acute  
48  
49 coronary syndrome (ACS): a randomized, controlled clinical process study. *Eur Heart J*.  
50  
51 2015;36(6):369-76.  
52

53  
54 14. Sebbane M, Lefebvre S, Kuster N, Jreige R, Jacques E, Badiou S, et al. Early rule out  
55  
56 of acute myocardial infarction in ED patients: value of combined high-sensitivity cardiac  
57  
58  
59  
60

1  
2  
3 troponin T and ultrasensitive copeptin assays at admission. *Am J Emerg Med.*  
4  
5 2013;31(9):1302-8.  
6

7  
8 15. Chenevier-Gobeaux C, Meune C, Lefevre G, Doumenc B, Sorbets E, Peschanski N, et  
9  
10 al. A single value of high-sensitive troponin T below the limit of detection is not enough for  
11  
12 ruling out non ST elevation myocardial infarction in the emergency department. *Clin*  
13  
14 *Biochem.* 2016;49(15):1113-7.  
15

16  
17 16. Bossuyt PM, Reitsma JB, Bruns DE, Gatsonis CA, Glasziou PP, Irwig LM, et al. The  
18  
19 STARD statement for reporting studies of diagnostic accuracy: explanation and elaboration.  
20  
21 *Ann Intern Med.* 2003;138(1):W1-12.  
22

23  
24 17. Hamm CW, Bassand J-P, Agewall S, Bax J, Boersma E, Bueno H, et al. ESC  
25  
26 Guidelines for the management of acute coronary syndromes in patients presenting without  
27  
28 persistent ST-segment elevation: The Task Force for the management of acute coronary  
29  
30 syndromes (ACS) in patients presenting without persistent ST-segment elevation of the  
31  
32 European Society of Cardiology (ESC). *Eur Heart J.* 2011;32(23):2999-3054.  
33  
34

35  
36 18. Thygesen K, Alpert JS, Jaffe AS, Simoons ML, Chaitman BR, White HD, et al. Third  
37  
38 universal definition of myocardial infarction. *Circulation.* 2012;126(16):2020-35.  
39

40  
41 19. Keller T, Zeller T, Ojeda F, Tzikas S, Lillpopp L, Sinning C, et al. Serial changes in  
42  
43 highly sensitive troponin I assay and early diagnosis of myocardial infarction. *JAMA.*  
44  
45 2011;306(24):2684-93.  
46

47  
48 20. Reichlin T, Hochholzer W, Bassetti S, Steuer S, Stelzig C, Hartwiger S, et al. Early  
49  
50 diagnosis of myocardial infarction with sensitive cardiac troponin assays. *N Engl J Med.*  
51  
52 2009;361(9):858-67.  
53

54  
55 21. Twerenbold R, Neumann JT, Sørensen NA, Ojeda F, Karakas M, Boeddinghaus J, et  
56  
57 al. Prospective Validation of the 0/1-h Algorithm for Early Diagnosis of Myocardial  
58  
59 Infarction. *J Am Coll Cardiol.* 2018;72:620-632.  
60

- 1  
2  
3 22. Righini M, Aujesky D, Roy P-M, Cornuz J, de Moerloose P, Bounameaux H, et al.  
4  
5 Clinical usefulness of D-dimer depending on clinical probability and cutoff value in  
6  
7 outpatients with suspected pulmonary embolism. *Arch Intern Med.* 2004;164(22):2483-7.  
8  
9  
10 23. Boeddinghaus J, Reichlin T, Nestelberger T, Twerenbold R, Meili Y, Wildi K, et al.  
11  
12 Early diagnosis of acute myocardial infarction in patients with mild elevations of cardiac  
13  
14 troponin. *Clin Res Cardiol.* 2017;106(6):457-467.  
15  
16  
17 24. Mokhtari A, Lindahl B, Schiopu A, Yndigegn T, Khoshnood A, Gilje P, et al. A 0h/1h  
18  
19 protocol for safe early discharge of chest pain patients. *Acad Emerg Med.* 2017;24(8):983-  
20  
21 992.  
22  
23  
24 25. White HD. Pathobiology of troponin elevations: do elevations occur with myocardial  
25  
26 ischemia as well as necrosis? *J Am Coll Cardiol.* 2011;57(24):2406-8.  
27  
28  
29 26. Korley FK. The Wait for High-Sensitivity Troponin Is Over-Proceed Cautiously.  
30  
31 *JAMA Cardiol.* 2018;3(2):112-113.  
32  
33  
34 27. Gu YL, Voors AA, Zijlstra F, Hillege HL, Struck J, Masson S, et al. Comparison of  
35  
36 the temporal release pattern of copeptin with conventional biomarkers in acute myocardial  
37  
38 infarction. *Clin Res Cardiol Off J Ger Card Soc.* 2011;100(12):1069-76.  
39  
40  
41 28. Slagman A, Searle J, Müller C, Möckel M. Temporal release pattern of copeptin and  
42  
43 troponin T in patients with suspected acute coronary syndrome and spontaneous acute  
44  
45 myocardial infarction. *Clin Chem.* 2015;61(10):1273-82.  
46  
47  
48 29. Wildi K, Zellweger C, Twerenbold R, Jaeger C, Reichlin T, Haff P, et al. Incremental  
49  
50 value of copeptin to highly sensitive cardiac troponin I for rapid rule-out of myocardial  
51  
52 infarction. *Int J Cardiol.* 2015;190:170-6.  
53  
54  
55  
56  
57  
58  
59  
60

**Table 1:** Main characteristics of original study designs

|                                    | <b>Sebbane et al. (14)</b>                                                 | <b>Chenevier-Gobeaux et al. (15)</b>                                                                                              |
|------------------------------------|----------------------------------------------------------------------------|-----------------------------------------------------------------------------------------------------------------------------------|
| <b>Inclusion Criteria</b>          | Prospective cohort of ED patients with CPO <12h                            | Consecutive patients, >18 years old, admitted to the ED or to the ICU by pre-hospital emergency ambulances                        |
| <b>Exclusion criteria</b>          | Patients with traumatic causes of chest pain                               | Patients <18 years old<br>Acute or chronic renal failure requiring dialysis                                                       |
| <b>Plasma sampling and storage</b> | Heparinized and EDTA blood collection. Storage at -80°C for later analysis | Heparinized blood collection after routine cTnI measurement. Storage at -40°C until HS-cTnT and copeptin measurement              |
| <b>Registration number/name</b>    | French Health Ministry (no. DC-2009-1052)                                  | French Local Ethic comity « Comité de Protection des Personnes Ile-de-France » III (Hôpital Cochin) et VI (CHU Pitié-Salpêtrière) |
| <b>Consent</b>                     | Written informed consent                                                   | Cochin Hospital: waiver of informed consent was authorized. Pitié-Salpêtrière Hospital: informed consent was granted.             |



**Table 2:** Main Characteristics of the studied population

|                                                 | All patients | CPO <2h<br>(very early<br>presenters) | CPO 2-4h   | CPO 4-6h   |
|-------------------------------------------------|--------------|---------------------------------------|------------|------------|
| <b>n</b>                                        | 449          | 160                                   | 143        | 146        |
| <b>Age (years)</b>                              | 58 ± 17      | 57 ± 16                               | 59 ± 17    | 58 ± 17    |
| <b>Men</b>                                      | 281 (63)     | 101 (63)                              | 96 (67)    | 84 (58)    |
| <b>Past medical history:</b>                    |              |                                       |            |            |
| Familial history of<br>CAD, present/total (%) * | 104/301 (35) | 63/147 (43)                           | 26/90 (29) | 15/64 (23) |
| Personal history of<br>CAD                      | 168 (37)     | 61 (38)                               | 57 (40)    | 50 (34)    |
| Dyslipidaemia                                   | 67 (15)      | 20 (13)                               | 22 (15)    | 25 (17)    |
| Diabetes                                        | 176 (39)     | 72 (45)                               | 51 (37)    | 53 (36)    |
| Smoking                                         | 158 (35)     | 52 (33)                               | 58 (41)    | 48 (33)    |
| Hypertension                                    |              |                                       |            |            |
| <b>Outcome:</b>                                 |              |                                       |            |            |
| Coronary angiography                            | 131 (29)     | 49 (31)                               | 46 (32)    | 36 (25)    |
| Admission                                       | 256 (57)     | 98 (61)                               | 91 (63)    | 67 (46)    |
| <b>Final Diagnostic:</b>                        |              |                                       |            |            |
| NSTEMI                                          | 55 (12)      | 15 (9)                                | 22 (13)    | 18 (12)    |
| other                                           | 394 (88)     | 145 (91)                              | 121 (85)   | 128 (88)   |

CAD, coronary artery disease; CPO, chest pain onset; NSTEMI, non ST-elevation myocardial infarction.

Results are expressed in mean ± SD or in number (percentage)

\*, missing data exist for this variable.

**Table 3:** AUC values according to CPO category

|                                       | <b>Biomarker</b>   | AUC   | 95% CI         |
|---------------------------------------|--------------------|-------|----------------|
| CPO <2h<br>(very early<br>presenters) | cTnI               | 0.841 | 0.775 to 0.894 |
|                                       | cTnI + copeptin    | 0.880 | 0.819 to 0.926 |
|                                       | HS-cTnT            | 0.853 | 0.789 to 0.904 |
|                                       | HS-cTnT + copeptin | 0.897 | 0.840 to 0.940 |
| CPO 2-4h                              | cTnI               | 0.886 | 0.823 to 0.933 |
|                                       | cTnI + copeptin    | 0.915 | 0.857 to 0.955 |
|                                       | HS-cTnT            | 0.869 | 0.802 to 0.919 |
|                                       | HS-cTnT + copeptin | 0.891 | 0.829 to 0.937 |
| CPO >4h                               | cTnI               | 0.995 | 0.965 to 1.000 |
|                                       | cTnI + copeptin    | 0.979 | 0.940 to 0.995 |
|                                       | HS-cTnT            | 0.980 | 0.942 to 0.996 |
|                                       | HS-cTnT + copeptin | 0.953 | 0.905 to 0.981 |

AUC, area under the ROC curve; CPO, chest pain onset

**Table 4:** Diagnostic performances for NSTEMI according to onset chest pain

| CPO                                                    | Biomarker            | Threshold             | Sensitivity<br>(%, [95%CI]) | Specificity<br>(%, [95%CI]) | Negative<br>predictive value<br>(%, [95%CI]) | Positive<br>predictive value<br>(%, [95%CI]) | Misdiagnosed<br>(**) (n) | Correctly ruled-<br>out, n (%) |
|--------------------------------------------------------|----------------------|-----------------------|-----------------------------|-----------------------------|----------------------------------------------|----------------------------------------------|--------------------------|--------------------------------|
| <b>&lt;2h</b><br>(very early<br>presenters)<br>(n=160) | cTnI                 | LoQ (*)               | 73 [45-91]                  | 97 [92-99]                  | 97 [92-99]                                   | 73 [45-91]                                   | 4                        | 141 (88)                       |
|                                                        | cTnI + copeptin      | LoQ (*) and 12 pmol/L | 87 [59-98]                  | 60 [52-68] ε                | 98 [92-100]                                  | 18 [7-24] ε                                  | 2                        | 87 (54) ε                      |
|                                                        | HScTnT               | 14 ng/L               | 80 [51-95]                  | 85 [78-90] ε                | 98 [93-100]                                  | 35 [20-53]                                   | 3                        | 123 (79) ε                     |
|                                                        |                      | 5 ng/L                | 87 [59-98]                  | 58 [50-66] ε ζ              | 98 [92-100]                                  | 18 [10-29] ε                                 | 2                        | 84 (52) ε ζ                    |
|                                                        | HS-cTnT+copeptin     | 3 ng/L                | 87[58-98]                   | 40 [32-49] ε ζ              | 97 [88-99]                                   | 13 [7-22] ε                                  | 2                        | 58 (36) ε ζ                    |
|                                                        |                      | 14 ng/L and 12 pmol/L | 93 [66-100]                 | 54 [46-62] ε ζ              | 99 [93-100]                                  | 18 [10-29] ε                                 | 1                        | 79 (49) ε ζ                    |
|                                                        |                      | 5 ng/L and 12 pmol/L  | 93 [66-100]                 | 41 [33-50] ε ζ              | 98 [89-100]                                  | 14 [8-23] ε                                  | 1                        | 59 (37) ε ζ                    |
|                                                        | 3 ng/L and 12 pmol/L | 93 [66-100]           | 25 [19-34] ε ζ              | 97 [85-100]                 | 12 [7-19] ε                                  | 1                                            | 37 (23) ε ζ              |                                |
| <b>2-4h</b><br>(n=143)                                 | cTnI                 | LoQ (*)               | 73 [50-89]                  | 95 [89-98]                  | 95 [89-98] ψ                                 | 73 [50-89]                                   | 6                        | 115 (80)                       |
|                                                        | cTnI + copeptin      | LoQ (*) and 12 pmol/L | 95 [75-100]                 | 57 [48-66] ε                | 99 [92-100]                                  | 29 [19-41] ε                                 | 1                        | 69 (48) ε                      |
|                                                        | HScTnT               | 14 ng/L               | 77 [54-91]                  | 79 [71-86] ε                | 95 [88-98] ψ                                 | 40 [26-56]                                   | 5                        | 96 (67) ε μ                    |
|                                                        |                      | 5 ng/L                | 91 [70-98]                  | 55 [46-64] ε ζ              | 97 [89-100]                                  | 27 [18-39] ε                                 | 2                        | 67 (47) ε ζ                    |
|                                                        | HS-cTnT+copeptin     | 3 ng/L                | 96 [75-100]                 | 45 [36-54] ε ζ              | 98 [89-100]                                  | 24 [16-34] ε                                 | 1                        | 54 (38) ε ζ                    |
|                                                        |                      | 14 ng/L and 12 pmol/L | 95 [75-100]                 | 50 [41-59] ε ζ              | 99 [91-100]                                  | 25 [17-36] ε                                 | 1                        | 58 (41) ε ζ                    |
|                                                        |                      | 5 ng/L and 12 pmol/L  | 100 [82-100]                | 35 [27-44] ε ζ              | 100 [90-100]                                 | 22 [15-32] ε                                 | 0                        | 42 (29) ε ζ                    |
|                                                        | 3 ng/L and 12 pmol/L | 100 [82-100]          | 29 [21-38] ε ζ              | 100 [88-100]                | 20 [14-30] ε                                 | 0                                            | 35 (25) ε ζ              |                                |
| <b>&gt;4h</b><br>(n=146)                               | cTnI                 | LoQ (*)               | 100 [77-100]                | 96 [91-99]                  | 100 [96-100]                                 | 77 [54-91]                                   | 0                        | 122 (85)                       |
|                                                        | cTnI + copeptin      | LoQ (*) and 12 pmol/L | 100 [77-100]                | 59 [50-68] ε                | 100 [94-100]                                 | 25 [16-37] ε                                 | 0                        | 75 (54) ε                      |
|                                                        | HScTnT               | 14 ng/L               | 100 [78-100]                | 87 [80-92] ε                | 100 [96-100]                                 | 51 [34-68]                                   | 0                        | 111 (77)                       |
|                                                        |                      | 5 ng/L                | 100 [78-100]                | 60 [51-68] ε ζ              | 100 [94-100]                                 | 35 [23-50] ε                                 | 0                        | 77 (53) ε μ ζ                  |
|                                                        | HS-cTnT+copeptin     | 3 ng/L                | 100 [78-100]                | 52 [43-61] ε ζ              | 100 [96-100]                                 | 23 [14-34] ε                                 | 0                        | 67 (47) ε ζ                    |
|                                                        |                      | 14 ng/L and 12 pmol/L | 100 [78-100]                | 55 [46-64] ε ζ              | 100 [94-100]                                 | 24 [15-35] ε                                 | 0                        | 70 (49) ε ζ                    |
|                                                        |                      | 5 ng/L and 12 pmol/L  | 100 [78-100]                | 40 [32-49] ε ζ              | 100 [91-100]                                 | 19 [12-29] ε ζ                               | 0                        | 51 (35) ε ζ                    |
|                                                        | 3 ng/L and 12 pmol/L | 100 [78-100]          | 34 [26-43] ε ζ              | 100 [96-100]                | 18 [11-27] ε ζ                               | 0                                            | 43 (30) ε ζ              |                                |

(\*) 0.04 μg/L (40 ng/L) for Bicêtre and Montpellier hospitals, 0.14 μg/L (140 ng/L) for other sites; (\*\*), false negative patients

ε p<0.05 versus cTnI alone; ζ p<0.05 versus HS-cTnT <14 ng/L alone; ψ p<0.05 versus delay >4h; μ, p<0.05 versus delay <2h

**Table 5:** Potentially misdiagnosed patients with low cTn thresholds and copeptin

| Sex | Age  | Dyslipidaemia | Smoke | Diabetes | Hypertension | Personal history of CAD | Chest pain since : | CPO' category               | cTnI                | HScTnT    | Copeptin     |
|-----|------|---------------|-------|----------|--------------|-------------------------|--------------------|-----------------------------|---------------------|-----------|--------------|
| M   | 89   | no            | no    | no       | yes          | yes                     | 1 hr 15 min        | <2h (very early presenters) | 0.04 µg/L (40 ng/L) | 44.9 ng/L | 208.7 pmol/L |
| M   | 86   | yes           | no    | no       | yes          | yes                     | 30 min             |                             | 0.06 µg/L (60 ng/L) | 11.3 ng/L | 77.2 pmol/L  |
| W   | 35   | no            | no    | no       | no           | no                      | 50 min             |                             | 0.01 µg/L (10 ng/L) | <3 ng/L   | 54.7 pmol/L  |
| W   | 44   | no            | yes   | no       | no           | no                      | 45 min             |                             | 0.01 µg/L (10 ng/L) | <3 ng/L   | 10.7 pmol/L  |
| W   | 74   | yes           | no    | no       | yes          | yes                     | 3 hrs              | 2-4h                        | 0.04 µg/L (40 ng/L) | 8.8 ng/L  | 10.7 pmol/L  |
| M   | 34,2 | yes           | yes   | no       | no           | no                      | 2 hrs 35 min       |                             | 0.04 µg/L (40 ng/L) | <3 ng/L   | 23.5 pmol/L  |
| M   | 55   | yes           | no    | no       | no           | yes                     | 3 hrs 50 min       |                             | 0.02 µg/L (20 ng/L) | 6 ng/L    | 25.9 pmol/L  |
| M   | 34   | no            | yes   | no       | no           | no                      | 3 hrs 15 min       |                             | 0.01 µg/L (10 ng/L) | 4 ng/L    | 52.4 pmol/L  |
| M   | 61   | yes           | yes   | no       | yes          | yes                     | 3 hrs              |                             | 0.03 µg/L (30 ng/L) | 19.7 ng/L | 27.2 pmol/L  |
| M   | 59   | no            | no    | no       | no           | no                      | 2 hrs 45 min       |                             | 0.04 µg/L (40 ng/L) | 10.1 ng/L | 241.8 pmol/L |

CAD, coronary artery disease; CPO, chest pain onset; M, men; W, women.



Figure 1: Flow chart of the studied population.

135x255mm (150 x 150 DPI)

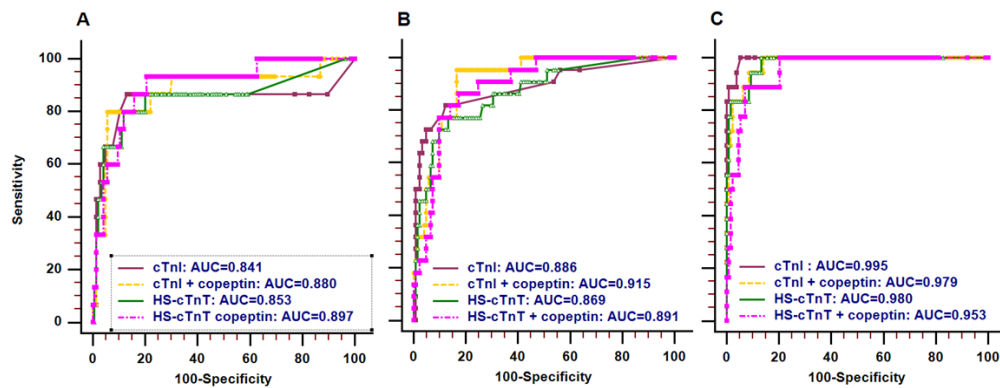

Figure 2: ROC curves of cTn for the diagnosis of NSTEMI, alone or in combination with copeptin. A, CPO < 2h; B, CPO 2-4h; C. CPO > 4h.

| Section & Topic          | No  | Item                                                                                                                                                   | Reported on page #                   |
|--------------------------|-----|--------------------------------------------------------------------------------------------------------------------------------------------------------|--------------------------------------|
| <b>TITLE OR ABSTRACT</b> |     |                                                                                                                                                        |                                      |
|                          | 1   | Identification as a study of diagnostic accuracy using at least one measure of accuracy (such as sensitivity, specificity, predictive values, or AUC)  | Page 1                               |
| <b>ABSTRACT</b>          |     |                                                                                                                                                        |                                      |
|                          | 2   | Structured summary of study design, methods, results, and conclusions (for specific guidance, see STARD for Abstracts)                                 | Page 2                               |
| <b>INTRODUCTION</b>      |     |                                                                                                                                                        |                                      |
|                          | 3   | Scientific and clinical background, including the intended use and clinical role of the index test                                                     | Page 4                               |
|                          | 4   | Study objectives and hypotheses                                                                                                                        | Pages 4 and 5                        |
| <b>METHODS</b>           |     |                                                                                                                                                        |                                      |
| <i>Study design</i>      | 5   | Whether data collection was planned before the index test and reference standard were performed (prospective study) or after (retrospective study)     | Page 6                               |
| <i>Participants</i>      | 6   | Eligibility criteria                                                                                                                                   | pp6&7 + Table1 p22                   |
|                          | 7   | On what basis potentially eligible participants were identified (such as symptoms, results from previous tests, inclusion in registry)                 | Pages 6-8                            |
|                          | 8   | Where and when potentially eligible participants were identified (setting, location and dates)                                                         | Page 6                               |
|                          | 9   | Whether participants formed a consecutive, random or convenience series                                                                                | Page 6                               |
| <i>Test methods</i>      | 10a | Index test, in sufficient detail to allow replication                                                                                                  | Pages 8 and 9                        |
|                          | 10b | Reference standard, in sufficient detail to allow replication                                                                                          | Pages 8 and 9                        |
|                          | 11  | Rationale for choosing the reference standard (if alternatives exist)                                                                                  | Page 7                               |
|                          | 12a | Definition of and rationale for test positivity cut-offs or result categories of the index test, distinguishing pre-specified from exploratory         | Page 9                               |
|                          | 12b | Definition of and rationale for test positivity cut-offs or result categories of the reference standard, distinguishing pre-specified from exploratory | Pages 8 and 9                        |
|                          | 13a | Whether clinical information and reference standard results were available to the performers/readers of the index test                                 | Pages 6, 8 and 9                     |
|                          | 13b | Whether clinical information and index test results were available to the assessors of the reference standard                                          | Page 7                               |
| <i>Analysis</i>          | 14  | Methods for estimating or comparing measures of diagnostic accuracy                                                                                    | Page 9                               |
|                          | 15  | How indeterminate index test or reference standard results were handled                                                                                | Page 7                               |
|                          | 16  | How missing data on the index test and reference standard were handled                                                                                 | Flow chart (Figure1) + pages 6 and 7 |
|                          | 17  | Any analyses of variability in diagnostic accuracy, distinguishing pre-specified from exploratory                                                      | Pages 6 and 7                        |
|                          | 18  | Intended sample size and how it was determined                                                                                                         | NA                                   |
| <b>RESULTS</b>           |     |                                                                                                                                                        |                                      |
| <i>Participants</i>      | 19  | Flow of participants, using a diagram                                                                                                                  | Flow chart (Figure1) + pages 6 and 7 |
|                          | 20  | Baseline demographic and clinical characteristics of participants                                                                                      | Table 2, page 23                     |
|                          | 21a | Distribution of severity of disease in those with the target condition                                                                                 | Table 2, page 23                     |
|                          | 21b | Distribution of alternative diagnoses in those without the target condition                                                                            | Table 2, page 23                     |
|                          | 22  | Time interval and any clinical interventions between index test and reference standard                                                                 | NA                                   |
| <i>Test results</i>      | 23  | Cross tabulation of the index test results (or their distribution) by the results of the reference standard                                            | Tables 3&4, p.24-25                  |
|                          | 24  | Estimates of diagnostic accuracy and their precision (such as 95% confidence intervals)                                                                | Table 4, page25                      |
|                          | 25  | Any adverse events from performing the index test or the reference standard                                                                            | Table 5 page 26                      |
| <b>DISCUSSION</b>        |     |                                                                                                                                                        |                                      |
|                          | 26  | Study limitations, including sources of potential bias, statistical uncertainty, and generalisability                                                  | Page 15                              |
|                          | 27  | Implications for practice, including the intended use and clinical role of the index test                                                              | Page 16                              |
| <b>OTHER INFORMATION</b> |     |                                                                                                                                                        |                                      |
|                          | 28  | Registration number and name of registry                                                                                                               | Table 1, page22                      |
|                          | 29  | Where the full study protocol can be accessed                                                                                                          | Table 1 page 22                      |
|                          | 30  | Sources of funding and other support; role of funders                                                                                                  | NA                                   |

# STARD 2015

---

## AIM

STARD stands for “Standards for Reporting Diagnostic accuracy studies”. This list of items was developed to contribute to the completeness and transparency of reporting of diagnostic accuracy studies. Authors can use the list to write informative study reports. Editors and peer-reviewers can use it to evaluate whether the information has been included in manuscripts submitted for publication.

---

## EXPLANATION

A **diagnostic accuracy study** evaluates the ability of one or more medical tests to correctly classify study participants as having a **target condition**. This can be a disease, a disease stage, response or benefit from therapy, or an event or condition in the future. A medical test can be an imaging procedure, a laboratory test, elements from history and physical examination, a combination of these, or any other method for collecting information about the current health status of a patient.

The test whose accuracy is evaluated is called **index test**. A study can evaluate the accuracy of one or more index tests. Evaluating the ability of a medical test to correctly classify patients is typically done by comparing the distribution of the index test results with those of the **reference standard**. The reference standard is the best available method for establishing the presence or absence of the target condition. An accuracy study can rely on one or more reference standards.

If test results are categorized as either positive or negative, the cross tabulation of the index test results against those of the reference standard can be used to estimate the **sensitivity** of the index test (the proportion of participants *with* the target condition who have a positive index test), and its **specificity** (the proportion *without* the target condition who have a negative index test). From this cross tabulation (sometimes referred to as the contingency or “2x2” table), several other accuracy statistics can be estimated, such as the positive and negative **predictive values** of the test. Confidence intervals around estimates of accuracy can then be calculated to quantify the statistical **precision** of the measurements.

If the index test results can take more than two values, categorization of test results as positive or negative requires a **test positivity cut-off**. When multiple such cut-offs can be defined, authors can report a receiver operating characteristic (ROC) curve which graphically represents the combination of sensitivity and specificity for each possible test positivity cut-off. The **area under the ROC curve** informs in a single numerical value about the overall diagnostic accuracy of the index test.

The **intended use** of a medical test can be diagnosis, screening, staging, monitoring, surveillance, prediction or prognosis. The **clinical role** of a test explains its position relative to existing tests in the clinical pathway. A replacement test, for example, replaces an existing test. A triage test is used before an existing test; an add-on test is used after an existing test.

Besides diagnostic accuracy, several other outcomes and statistics may be relevant in the evaluation of medical tests. Medical tests can also be used to classify patients for purposes other than diagnosis, such as staging or prognosis. The STARD list was not explicitly developed for these other outcomes, statistics, and study types, although most STARD items would still apply.

---

## DEVELOPMENT

This STARD list was released in 2015. The 30 items were identified by an international expert group of methodologists, researchers, and editors. The guiding principle in the development of STARD was to select items that, when reported, would help readers to judge the potential for bias in the study, to appraise the applicability of the study findings and the validity of conclusions and recommendations. The list represents an update of the first version, which was published in 2003.

More information can be found on <http://www.equator-network.org/reporting-guidelines/stard>.





# BMJ Open

**Is high-sensitivity troponin, alone or in combination with copeptin, sensitive enough for ruling out NSTEMI in very early presenters at admission ? A post-hoc analysis performed in emergency departments.**

|                                 |                                                                                                                                                                                                                                                                                                                                                                                                                                                                                                                                                                                                                                                                                                                  |
|---------------------------------|------------------------------------------------------------------------------------------------------------------------------------------------------------------------------------------------------------------------------------------------------------------------------------------------------------------------------------------------------------------------------------------------------------------------------------------------------------------------------------------------------------------------------------------------------------------------------------------------------------------------------------------------------------------------------------------------------------------|
| Journal:                        | <i>BMJ Open</i>                                                                                                                                                                                                                                                                                                                                                                                                                                                                                                                                                                                                                                                                                                  |
| Manuscript ID                   | bmjopen-2018-023994.R3                                                                                                                                                                                                                                                                                                                                                                                                                                                                                                                                                                                                                                                                                           |
| Article Type:                   | Research                                                                                                                                                                                                                                                                                                                                                                                                                                                                                                                                                                                                                                                                                                         |
| Date Submitted by the Author:   | 11-Mar-2019                                                                                                                                                                                                                                                                                                                                                                                                                                                                                                                                                                                                                                                                                                      |
| Complete List of Authors:       | Chenevier-Gobeaux, Camille; Hopital Cochin, SDBA<br>Sebbane, Mustapha; Centre Hospitalier Regional Universitaire de Montpellier, Emergency Departement<br>Meune, Christophe; Avicenne University Hospital, Cardiology; Paris 13 University,<br>Lefebvre, Sophie; Centre Hospitalier Regional Universitaire de Montpellier, Emergency department<br>Dupuy, Anne-Marie; Montpellier University Hospital Centre, Department of Biochemistry<br>Lefevre, Guillaume; Hopital Tenon, Laboratoire de Biochimie et Hormonologie<br>Peschanski, Nicolas; CHU de Rouen, Service des Urgences Adultes; Institute for Biomedical Research and Innovation , INSERM U1096<br>Ray, Patrick; Hopital Tenon, Emergency Department |
| <b>Primary Subject Heading</b>: | Emergency medicine                                                                                                                                                                                                                                                                                                                                                                                                                                                                                                                                                                                                                                                                                               |
| Secondary Subject Heading:      | Diagnostics, Cardiovascular medicine, Emergency medicine                                                                                                                                                                                                                                                                                                                                                                                                                                                                                                                                                                                                                                                         |
| Keywords:                       | high sensitive cardiac troponin, non ST-elevation acute myocardial infarction, copeptin, very early presenters, chest pain onset                                                                                                                                                                                                                                                                                                                                                                                                                                                                                                                                                                                 |
|                                 |                                                                                                                                                                                                                                                                                                                                                                                                                                                                                                                                                                                                                                                                                                                  |

SCHOLARONE™  
Manuscripts

1  
2  
3 **Revised manuscript Ref: bmjopen-2018-023994\_R3**  
4  
5

6 **Is high-sensitivity troponin, alone or in combination with copeptin, sensitive enough for**  
7 **ruling out NSTEMI in very early presenters at admission ? A post-hoc analysis**  
8 **performed in emergency departments.**  
9  
10  
11  
12

13 Camille Chenevier-Gobeaux (1), Mustapha Sebbane (2), Christophe Meune (3, 4), Sophie  
14 Lefebvre (2), Anne-Marie Dupuy (5), Guillaume Lefèvre (6, 7), Nicolas Peschanski (8),  
15 Patrick Ray (9, 10)  
16  
17  
18  
19

#### 20 **Authors' affiliations**

21 (1) Service de Diagnostic Biologique Automatisé, Hôpital Cochin, Hôpitaux Universitaires  
22 Paris Centre (HUPC), Assistance Publique des Hôpitaux de Paris (AP-HP), Paris, France.  
23 [camille.gobeaux@aphp.fr](mailto:camille.gobeaux@aphp.fr)

24 (2) Département des Urgences, Hôpital Lapeyronie, CHU de Montpellier, Montpellier, France.  
25 [m-sebbane@chu-montpellier.fr](mailto:m-sebbane@chu-montpellier.fr) ; [s-lefebvre@chu-montpellier.fr](mailto:s-lefebvre@chu-montpellier.fr)

26 (3). Service de Cardiologie, Hôpital Avicenne, Hôpitaux Universitaires Paris Seine Saint  
27 Denis, Assistance Publique des Hôpitaux de Paris (AP-HP), Bobigny; Université Paris 13,  
28 Paris, France. [christophe.meune@aphp.fr](mailto:christophe.meune@aphp.fr)

29 (4) INSERM UMR S-942, Paris, France

30 (5) Département de Biochimie, Hôpital Lapeyronie – CHU Montpellier - MONTPELLIER  
31 France. [am-dupuy@chu-montpellier.fr](mailto:am-dupuy@chu-montpellier.fr)

32 (6) Laboratoire de Biochimie et Hormonologie, Hôpital Tenon, Hôpitaux Universitaires Est  
33 Parisien, Assistance Publique des Hôpitaux de Paris (AP-HP), Paris, France.  
34 [guillaume.lefevre@aphp.fr](mailto:guillaume.lefevre@aphp.fr)

35 (7) Sorbonne Universités UPMC-University Paris06, GRC-14 BIOSFAST, Paris.

36 (8) Urgences-SMUR, Centre Hospitalier Eure-Seine - Hôpital d'Évreux, Rue Léon  
37 Schwartzberg, 27015 Évreux, France. [n.peschanski@neuf.fr](mailto:n.peschanski@neuf.fr)

38 (9) Centre Régional Universitaire des Urgences, Hôpital François Mitterrand, 5 Boulevard  
39 Jeanne d'Arc, 21000 Dijon, France. [patrick.ray@chu-dijon.fr](mailto:patrick.ray@chu-dijon.fr)

40 (10) Université de Bourgogne, Dijon, France.  
41  
42  
43  
44

#### 45 **Correspondance:**

46 Camille Chenevier-Gobeaux, Service de Diagnostic Biologique Automatisé, Hôpital Cochin,  
47 Hôpitaux Universitaires Paris Centre, Assistance Publique des Hôpitaux de Paris (AP-HP), 27  
48 rue du Fbg St Jacques, 75679 Paris cedex 14, France. Tel : +33 1 58 41 19 16. Fax : + 33 1 58  
49 41 31 84. Mail: [camille.gobeaux@aphp.fr](mailto:camille.gobeaux@aphp.fr)  
50  
51  
52  
53

54 **Keywords:** high sensitive cardiac troponin, chest pain, non ST-elevation acute myocardial  
55 infarction, copeptin, very early presenters, chest pain onset.  
56  
57  
58  
59  
60

## Abstract

**Objectives:** Copeptin and high-sensitivity cardiac troponin (HS-cTn) assays improve the early detection of NSTEMI. Their sensitivities may however be reduced in very early presenters.

**Setting:** We performed a post-hoc analysis of three prospective studies that included patients who presented to the Emergency Department for chest pain onset (CPO) of less than 6 hours.

**Participants:** 449 patients were included, in whom 12% had NSTEMI. CPO occurred <2h from ED presentation in 160, between 2-4h in 143, and >4h in 146 patients. The prevalence of NSTEMI was similar in all groups (9%, 13% and 12%, respectively,  $p=0.281$ ). **Measures:** Diagnostic performances of HS-cTn and copeptin at presentation were examined according to CPO. The discharge diagnosis was adjudicated by 2 experts, including cTnI. HS-cTn and copeptin were blindly measured. **Results:** Diagnostic accuracies of cTnI, cTnI+copeptin and HS-cTnT (but not HS-cTnT+copeptin) lower through CPO categories. For patients with CPO<2h, the choice of a threshold value of 14 ng/L for HS-cTnT resulted in 3 false negative (Sensitivity 80% [95%CI: 51-95]; specificity 85% [78-90]; 79% of correctly ruled-out patients) and that of 5 ng/L in 2 false negative (Sensitivity 87% [59-98]; specificity 58% [50-66]; 52% of correctly ruled-out patients). The addition of copeptin to HS-cTnT induced a decrease of misclassified patients to 1 in patients with CPO<2h (Sensitivity 93% [66-100]; specificity 41% [33-50]). **Conclusion:** A single measurement of HS-cTn, alone or in combination with copeptin at admission, seems not safe enough for ruling out NSTEMI in very early presenters (with CPO<2h). **Trial registrations:** French Health Ministry (no. DC-2009-1052), French Local Ethic comity « Comité de Protection des Personnes Ile-de-France » III (Hôpital Cochin) et VI (CHU Pitié-Salpêtrière).

### Strengths

- Focus on very early chest pain presenters that was not performed before

### Limitations of our study

- Small numbers of very early chest pain presenters, although the data grouping of 3 previous studies
- A single measurement of troponin at admission was considered for the analysis, but not its kinetics
- The gold standard diagnosis was based on a non-HS cTn.

## Introduction

The management of patients with acute chest pain at the Emergency Department (ED) is a major health problem and an adequate ruling out process for non-ST elevation acute myocardial infarction (NSTEMI) is crucial. Cardiac troponin (cTn) measurement with conventional assays and more recent high-sensitivity cardiac troponin assays (HS-cTn), are current diagnostic tools for the assessment of these patients (1). The European Society of Cardiology guidelines proposed a rapid rule-out strategy using low HS-cTn values (i.e. values below the Limit of Detection of the assay -LoD-) as decisional threshold for ruling out NSTEMI (1). The accuracy of a rapid 0-hour/1-hour algorithm has also been recently demonstrated in patients with CPO<6h (2) and is endorsed by the latest ESC guidelines (1). In this analysis, the authors indicated that using a single HS-cTnT cutoff value of 14 ng/L at presentation resulted in 88.7% sensitivity and 97.3% negative predictive value (NPV), but that this single assay strategy was less effective than the combination of absolute level of HS-cTnT measured at presentation and again at 1 hour, combined with the absolute difference between the two levels (2).

However, in very early presenters, such rapid and efficient triage at presentation may be uncertain (3). Indeed, very early presenters, defined as having chest pain <2h, are considered by some authors as highly vulnerable as they may not present all symptoms and signs and thus be exposed to a higher risk of misdiagnosis and therefore worse outcome (4); the application of a rapid algorithm to these patients may lead to early discharge within 3 hours from ED admission. Recently, a meta-analysis (based on eleven studies) indicated that a single HS-cTnT concentration below the limit of detection may successfully rule out AMI (5). However, concerns have been raised about the safety of a single measurement rule out protocol performed at presentation in early presenters (6,7).

1  
2  
3 Copeptin (in association with cTn) assays improve the early detection of NSTEMI (8–12).

4  
5 Indeed, a randomized controlled trial demonstrated the safety of early discharge using a single  
6  
7 combination of copeptin + cTn at presentation for patients with CPO <6h (13).

8  
9  
10 The present study aimed to assess the diagnostic performance of HS-cTn and copeptin as a  
11  
12 single measurement at admission in very early ED presenters with suspected NSTEMI.  
13  
14  
15  
16  
17  
18  
19  
20  
21  
22  
23  
24  
25  
26  
27  
28  
29  
30  
31  
32  
33  
34  
35  
36  
37  
38  
39  
40  
41  
42  
43  
44  
45  
46  
47  
48  
49  
50  
51  
52  
53  
54  
55  
56  
57  
58  
59  
60

For peer review only

## Patients and methods

### *Study design and population*

The study is a *post-hoc* analysis of three French prospective clinical studies (already published) of cardiac biomarker testing, each to explore the usefulness of copeptin and/or HS-cTnT testing in patients who presented to the ED with acute chest pain of less than 6h (14,15). However, none of these studies evaluated the influence of CPO value on diagnostic performances. All three trials had comparable inclusion/exclusion criteria and gathered similar clinical information (Table 1). Patients requiring renal replacement therapy were excluded. All studies received approval from local Institutional Review Board. The study complied with the principles of the Declaration of Helsinki. Recommendations of the Standards for Reporting of Diagnostic Accuracy (STARD) initiative were applied (16).

### *Patient Involvement*

The development of the research question was not informed by patients. Patients were not involved in the design of this study. Patients were not involved in the recruitment to and conduct of the study. There was no results dissemination to study participants.

### *Routine assessment*

All patients underwent an initial clinical evaluation (including clinical history, physical examination, 12-lead ECG, pulse oximetry, routine blood tests, and chest X-ray). Conventional cardiac Troponin I (cTnI) was measured on a venous blood collection performed at presentation and, if required, repeated after 3 to 9 h, as clinically indicated (17). The onset of chest pain (CPO), defined as the delay from symptom onset to presentation was recorded, based on patient history/declaration. When history was incomplete or inconsistent, CPO was not recorded and patient was excluded of the analysis (see flow chart, Figure 1).

1  
2  
3 Based on all clinical, biological (including cTnI value, but not HS-cTnT and copeptin values  
4 which were blindly measured) and imaging results, a decision was made by the attending  
5 physician to admit or discharge the patient, as well as medical therapy and revascularization if  
6 indicated. Attending emergency physicians and cardiologists were blinded to the results of  
7 HS-cTnT and copeptin, and biologists were blinded to the suspected diagnosis at presentation.  
8 Patients with no cTnI results and/or no recorded CPO value, and patients with a final  
9 diagnosis of STEMI, were excluded (see flowchart, Figure 1).  
10  
11  
12  
13  
14  
15  
16  
17  
18  
19  
20

### 21 ***Gold standard diagnosis***

22  
23 The gold standard diagnosis was adjudicated by two independent experts (emergency  
24 physician and cardiologist) who reviewed all available medical records (including patient  
25 history, physical findings, laboratory results including cTnI value and radiologic testing, ECG,  
26 echocardiography, cardiac exercise test, coronary angiography, summary chart at discharge)  
27 pertaining to the patient from the time of ED presentation to 30-day follow-up. Experts were  
28 blind to copeptin and HS-cTnT results. In the event of diagnostic disagreement, cases were  
29 reviewed and adjudicated in conjunction with a third expert.  
30  
31  
32  
33  
34  
35  
36  
37  
38  
39

40 AMI was diagnosed according to the universal definition that was in force at the time of  
41 inclusions and adapted to the use of a conventional cTn (18). Thus, patients with a cTnI  
42 increase (or a rise/fall pattern) above the 10%CV threshold, associated with at least one of the  
43 following: symptoms of myocardial ischemia, new ST-T changes or new Q wave on ECG,  
44 imaging of new loss of viable myocardium, or normal cTnI on admission, were classified as  
45 having an MI (STEMI with a ST elevation in at least 2 continuous leads on ECG or new onset  
46 of left bundle branch block, or NSTEMI). STEMI patients were excluded from the analysis,  
47 based on ST elevation observed on the ECG (see Flow chart, Fig. 1). Patients were classified  
48  
49  
50  
51  
52  
53  
54  
55  
56  
57  
58  
59  
60



1  
2  
3 according to the CPO, <2h, from 2-4h and >4h; those with a CPO <2 hours were considered  
4  
5 as very early presenters.  
6

7 Unstable angina (UA) diagnosis was adjudicated in patients with history or clinical symptoms  
8  
9 consistent with ACS but without ST-T changes on the ECG and without change of cTn on  
10  
11 serial testing. Other diagnostic categories beside NSTEMI and UA were non-ACS (e.g., stable  
12  
13 angina, myocarditis, arrhythmias, heart failure, pulmonary embolism, and chest pain of  
14  
15 unknown origin). UA and non-ACS chest pain were considered as non-NSTEMI in our  
16  
17 analysis.  
18  
19  
20  
21  
22

### 23 ***Troponin measurements***

24  
25 Plasma cTnI concentrations were routinely measured on an X-pand® HM analyzer, using the  
26  
27 Cardiac Troponin-I immunoassay (Siemens Healthcare Diagnostics Inc., Newark, CT) in two  
28  
29 EDs (Cochin and La Pitié Salpêtrière Hospitals). The limit of detection (LoD) was 0.04 µg/L  
30  
31 (40 ng/L). The limit of quantitation (LoQ), i.e. the 10% imprecision point (or 10% CV),  
32  
33 which is the lowest cTn concentration that can be reproducibly measured with a between-run  
34  
35 CV of ≤10%, was 0.14 µg/L (140 ng/L). The 99<sup>th</sup> percentile of the assay was 0.07 µg/L (70  
36  
37 ng/L), with coefficients of variations (CV) between 15 to 22 %. The measuring range was  
38  
39 0.04 to 40 µg/L (40 to 40,000 ng/L), and the imprecision values across the measuring range  
40  
41 were below 10%.  
42  
43  
44  
45  
46

47 In Bicêtre and in Montpellier hospitals, plasma cTnI concentrations were routinely measured  
48  
49 on an Access® analyser (Beckman Coulter, Inc., Brea, CA). According to the manufacturer's  
50  
51 data, the limit of detection (LoD) was 0.01 µg/L (10 ng/L), the 20% point on the imprecision  
52  
53 curve was 0.02 µg/L (20 ng/L). The LoQ/10%CV was 0.04 µg/L (40 ng/L). The 99<sup>th</sup>  
54  
55 percentile of the assay was 0.04 µg/L (40 ng/L). The measuring range was 0.01 to 100 µg/L  
56  
57 (10 to 100,000 ng/L), and the imprecision values across the measuring range were below 10%.  
58  
59  
60

1  
2  
3 After routine cTnI measurement, plasma samples were aliquoted and frozen (-40°C) until HS-  
4 cTnT and copeptin measurement.  
5

6  
7 Hs-cTnT was measured in heparinized collected samples, on an Elecsys2010® analyser  
8 (Roche Diagnostics, Meylan, France). The limit of blank (LoB) \*was 3 ng/L, the LoD was 5  
9 ng/L, and the 99<sup>th</sup> percentile was 14 ng/L. The measuring range was 3 to 10,000 ng/L. In our  
10 laboratory, CVs obtained in Roche quality controls containing 27.5 and 2,360 ng/L of cTnT  
11 were 3.6 and 2.8 % (between-run precision) and 1.4 and 0.4 % (within-run precision). Of note,  
12 the LoD is measured with a between-run CV of >10%, while the 99<sup>th</sup> percentile is a precise  
13 concentration (CV<10%) (7). HS-cTnT determinations were performed blinded to the clinical  
14 assessment of the emergency physicians.  
15  
16  
17  
18  
19  
20  
21  
22  
23  
24  
25  
26  
27

### 28 ***Copeptin measurement***

29  
30 Copeptin was measured in heparinized blood samples collected on admission. The assay was  
31 performed on a KRYPTOR® analyser using ThermoFisher Scientific sandwich  
32 immunoluminometric assay (B.R.A.H.M.S Copeptin KRYPTOR, B.R.A.H.M.S  
33 Aktiengesellschaft, Hennigsdorf, Germany). The assay principle is based on TRACE  
34 technology (Time-Resolved Amplified Cryptate Emission). The lower detection limit is 4.8  
35 pmol/L, and the functional assay sensitivity (20%CV value) is <12 pmol/L (data from  
36 manufacturer, recommended threshold value for this method). Copeptin determinations were  
37 performed blinded to the clinical assessment of the emergency physicians.  
38  
39  
40  
41  
42  
43  
44  
45  
46  
47  
48  
49  
50

### 51 ***Statistical analysis***

52  
53 Continuous variables are presented as means ± SD, and categorical variables are expressed as  
54 numbers (percentage). Continuous variables were compared by using the Kruskal-Wallis test,  
55 and categorical variables were assessed using Pearson's  $\chi^2$  test. Number of misclassified  
56  
57  
58  
59  
60

1  
2  
3 patients and number of correctly ruled-out patients were collected for each threshold strategy,  
4  
5 and correspond to the false negative and the true positive patients, respectively.  
6

7 Receiver operating characteristic (ROC) curves were constructed to assess the sensitivity and  
8  
9 specificity, positive predictive value (PPV) and negative predictive value (NPV) throughout  
10  
11 the concentrations of cTnI, HS-cTnT and copeptin for the diagnosis of NSTEMI, and  
12  
13 according to the CPO. cTn and copeptin values were log-transformed before combination for  
14  
15 ROC analysis. For cTnI values, as they were obtained from two non-standardized methods,  
16  
17 values were normalized by factorizing to the 99th percentile of the method prior to ROC  
18  
19 analysis in order to remove any bias due to methodological differences.  
20  
21  
22

23 Diagnostic thresholds that were used for classification of the data are:

- 24 - For cTnI, the LoQ values: 0.04 µg/L (40 ng/L) for Bicêtre and Montpellier hospitals,  
25  
26 0.14 µg/L (140 ng/L) for other sites,  
27  
28
- 29 - For HS-cTnT, The LoB (3 ng/L), the LoD (5 ng/L) and the 99<sup>th</sup> percentile (14 ng/L),  
30  
31
- 32 - For copeptin, the manufacturer's recommended threshold at 12 pmol/L.  
33  
34

35 All data are presented with their 95% confidence intervals [95%CI]. All hypothesis testing  
36  
37 was two-tailed, and  $p < 0.05$  was considered statistically significant. Statistical analysis was  
38  
39 performed using MedCalc (MedCalc Software, Version 12.4.0.0, Mariakerke, Belgium).  
40  
41  
42  
43  
44  
45  
46  
47  
48  
49  
50  
51  
52  
53  
54  
55  
56  
57  
58  
59  
60

## Results

### *Characteristics of the studied population*

Table 2 shows the characteristics of the studied population. Briefly, in the total cohort mean age was  $58 \pm 17$  years, and included more males. A gold standard diagnosis of NSTEMI was adjudicated in 55 patients (12%). Delay from chest pain onset to ED admission was  $<2$  hours in 160 (36%) patients, was from 2 to 4 hours in 143 (32%) and was  $>4$  hours (and below 6 hours) in 146 (32%) patients. Very early presenters with NSTEMI ( $n=15$ ) tended to be older than those without NSTEMI ( $n=145$ ) (65 vs. 55 years-old), were more frequently hospitalized (93% vs. 58%), and also more frequently underwent diagnostic coronary angiography (73% vs. 27%).

### *Diagnostic performances according to CPO*

ROC curves of cTn for the diagnosis of NSTEMI, alone or in combination with copeptin are presented in Figure 2. Diagnostic accuracies of cTnI, cTnI+copeptin and HS-cTnT are reduced when time to onset of chest pain gets less, as indicated by estimated AUCs and their 95%CI intervals (Table 3). The AUCs of HS-cTnT+copeptin were not different through the CPO categories.

Diagnostic performances of cTn, alone or in combination with copeptin, and using different decisional thresholds, are presented in Table 4.

In very early presenters (CPO  $<2$  hours), a single value of cTnI alone had low sensitivity (73 [73-91] %) but high specificity (97 [92-99]%), and misclassified 4 of 15 NSTEMI patients. However, this strategy could correctly rule-out 141 patients (88%). Combining copeptin with cTnI increases sensitivity, and lowers the number of misdiagnosed patients from 4 to 2, but significantly lowers the rate of ruled-out patients from 88% to 54% (Table 4). Of note, addition of copeptin also significantly lowered specificity. At a threshold of 14 ng/L, HS-

1  
2  
3 cTnT had low sensitivity (80 [59-98] %), misclassified 3 NSTEMI patients but could  
4 correctly rule-out 123 (79%) patients, which is less than using cTnI. The sensitivity of HS-  
5  
6  
7  
8  
9  
10  
11  
12  
13  
14  
15  
16  
17  
18  
19  
20  
21  
22  
23  
24  
25  
26  
27  
28  
29  
30  
31  
32  
33  
34  
35  
36  
37  
38  
39  
40  
41  
42  
43  
44  
45  
46  
47  
48  
49  
50  
51  
52  
53  
54  
55  
56  
57  
58  
59  
60

cTnT had low sensitivity (80 [59-98] %), misclassified 3 NSTEMI patients but could correctly rule-out 123 (79%) patients, which is less than using cTnI. The sensitivity of HS-TnT alone is likely to be suboptimal in early presenters, but can be improved by using a lower threshold for positivity or adding copeptin (but this is accompanied with a marked loss of specificity). The addition of copeptin induced a decrease in misclassified patients from 2 to 1, either with an HS-cTnT threshold at 14 or at 5 ng/L. This ultimate misdiagnosed NSTEMI patient with CPO <2h who presented with all undetectable biomarkers was a 44-years old woman with a history of smoking and no CV risk factors; the CPO was 45 min before hospital admission (Table 5).

In patients with CPO 2-4 hours, results are similar to those observed in very early presenters, although the number of misclassified patients was different (Table 4). Adding copeptin to cTnI induced a decrease of misclassified patients from 5 to 1 for an HS-cTnT threshold at 14 ng/L, and from 2 to 0 for an HS-cTnT threshold at 5 ng/L. In particular, combining copeptin to the LoD (5 ng/L) of HS-cTnT reached 100% sensitivity of the test. Similar performance was observed using the LoB (3ng/L) of HS-cTnT. Indeed, all NSTEMI patients with CPO 2-4 h had a detectable HS-cTnT and/or an elevated copeptin. In this sub-group again, the use of copeptin lowered significantly the specificity of the test.

As expected, in patients with CPO >4 hours, all patients had quantitative cTnI and detectable HS-cTnT. No patient was misclassified. The addition of copeptin in this sub-group had no effect on sensitivity or misclassified patients.

### ***Potential misdiagnosed NSTEMI***

Characteristics of potential misdiagnosed NSTEMI patients are detailed in Table 5. All potentially missed NSTEMI in the very early presenters population had a CPO <1 hour. We found no distinguishing characteristics in misclassified patients when comparing to correctly

1  
2  
3 diagnosed patients in terms of age, sex, and cardiovascular risks, in each CPO category. Of  
4  
5 note, when STEMI patients were included in our analysis, results were comparable (data not  
6  
7 shown).  
8  
9  
10  
11  
12  
13  
14  
15  
16  
17  
18  
19  
20  
21  
22  
23  
24  
25  
26  
27  
28  
29  
30  
31  
32  
33  
34  
35  
36  
37  
38  
39  
40  
41  
42  
43  
44  
45  
46  
47  
48  
49  
50  
51  
52  
53  
54  
55  
56  
57  
58  
59  
60

For peer review only

## Discussion

Our results indicate that diagnostic performances of HS-cTnT values at admission, alone or combined with copeptin, are reduced in the subgroup of patients with shorter CPO. Emergency physicians may not rule out NSTEMI in very early presenters with a single low value of HS-cTnT and/or copeptin at presentation.

Our studied population included one third of early presenters, and this proportion is similar to that found by Boeddinghaus et al (26% of patients presented within 2h from CPO) (4), by Keller et al (37% and 38% of patients with CPO<3h, (8,19)), and by Reichlin et al. (222 patients with CPO<3h out of 718, i.e. 31%) (20). More recently, Stallone et al reported 519 (26%) patients that arrived within 2 hours of symptom onset to the ED (6), and Twerenbold et al. reported the largest subgroup investigated so far with 1,322 early presenters (with CPO<3h) out of 4,368, i.e. 30% (21). This may reflect that our study was performed in large urban areas equipped with pre-hospital emergency ambulances. A more prolonged delay might be expected in more rural regions. The exact definition of very early presenters is still a matter of debate. Authors nevertheless agree to define them as presenting before 2h (20). Very few studies examined the specific groups of early/very early presenters (4,6,8,20) In the ESC guidelines, a different strategy is recommended for patients with versus without CPO<6h (0/3h-algorithm) (1). Earlier presenters are taken into account in the 0/1h-algorithm, but in this strategy the rapid exclusion with a unique measurement at admission (H0) is only applicable if CPO>3h (1). We believe that this proportion is not negligible and the impact of this very early population might be underestimated in studies where the CPO is not evaluated.

We observed that AUCs of cTnI, cTnI+copeptin and HS-cTnT were significantly lower when CPO<4h. The NPVs were not significantly impacted by the CPO, but a suboptimal sensitivity and a non-negligible proportion of misclassified NSTEMI was observed in patients with CPO<2h for all tested thresholds and combinations, even if cTnI and HS-cTnT performances

1  
2  
3 can be improved by using a lower threshold for positivity or adding copeptin. The same was  
4 true for patients with CPO 2-4h, except when using the combination of HS-cTnT <5 ng/L and  
5 copeptin <12  $\mu$ mol/L. We reported the number of misclassified patients in addition to  
6 sensitivity and NPV, because NPV is known to be dependent of the prevalence, thus its value  
7 might be biased. The absolute number of misdiagnosed patients might be more clinically  
8 pertinent than NPV (22).  
9

10  
11  
12 As previously suggested (1), we found that sensitivity and NPV of a single measurement of  
13 HS-cTn at admission seems not safe enough to exclude a NSTEMI in very early presenters.  
14 We here show that lowering HS-cTn decisional threshold to LoD or to LoB is not sufficient to  
15 detect all NSTEMI among very early chest pain presenters. Although combining copeptin to  
16 HS-cTnT increased sensitivity and lowered number of misclassified patients, none of the  
17 tested strategies allowed for identification of all NSTEMI. Results obtained in very early  
18 presenters were very similar to patients with CPO 2-4h, except that in this later sub-group  
19 combining copeptin with HS-cTnT succeeded in significantly increasing sensitivity (all  
20 NSTEMI patients had a detectable HS-cTnT and/or an elevated copeptin).  
21  
22

23  
24  
25 Our results can be compared to those of Boeddinghaus et al. who found that sensitivity of a  
26 single HS-cTn measurement is lower in very early presenters, in comparison to all patients (4).  
27 These authors indicated that using a single cut-off approach, 61% of the very early presenters  
28 were ruled-out, which resulted in a sensitivity of 94% and a NPV of 98%. They conclude that  
29 the single cutoff strategy should not be applied in early presenters. However, the authors did  
30 not evaluate the impact of copeptin across CPO categories. In another study, the same authors  
31 indicated that the additional use of copeptin did not sufficiently improve diagnostic accuracy  
32 in early presenters (23). Here again, our results are in accordance with those of Boeddinghaus  
33 indicating that copeptin did not improve diagnostic accuracy of hs-cTnI at presentation in  
34 early presenters (23). Mueller et al showed, using the rapid 0-hour/1-hour algorithm that 63%  
35  
36  
37  
38  
39  
40  
41  
42  
43  
44  
45  
46  
47  
48  
49  
50  
51  
52  
53  
54  
55  
56  
57  
58  
59  
60



1  
2  
3 patients with CPO<6h were classified as rule-out. However, 7 patients were missed (0.9%  
4 rate), in whom 3 had HS-cTnT<LoD at presentation and at 1 hour (2). Moreover, a single  
5 cutoff value for HS-cTnT at 14 ng/L at presentation resulted in a sensitivity of 88.7% and a  
6 NPV of 97.3%, and performed less adequately than the combination of HS-cTnT at  
7 presentation with 1-hour level and 1-hour absolute change (2). In a more recent study,  
8 Mokhtari et al. evaluated a rapid 0H/1H protocol for discharge chest pain patients based on a  
9 single value <LoD at admission (24). These authors found 2 missed patients in their  
10 population, and recognize that the safety of such rapid protocol is not clear in very early  
11 presenters. They further recommend additional HS-cTnT testing at 3 hours for very early  
12 presenters (24).  
13  
14  
15  
16  
17  
18  
19  
20  
21  
22  
23  
24  
25

26 Performance of cardiac troponins, although measured using HS assays, might be limited in  
27 very early presenters because of their kinetics of release into the blood circulation (8). The  
28 release of cTn into the circulation following cardiomyocyte damage is a time-dependent  
29 phenomenon (25), and a single measurement approach may fail at identifying AMI very early  
30 after the onset of symptoms (26). Indeed we, like other authors, found very early presenters  
31 with undetectable HS-cTnT at admission. Time-dependent release of copeptin during AMI  
32 has been described earlier, and this biomarker has been considered as an early biomarker (8).  
33 Copeptin increases immediately after induction of ischemia, and peaks 90 min after (27).  
34 However, some authors recently indicated that copeptin kinetics might be different in  
35 NSTEMI in comparison to STEMI, and that if copeptin is increased at first medical contact in  
36 the ambulance, the circulating concentrations may rapidly decrease down to normal ranges at  
37 the time of hospital admission (28). Our results are in accordance with this observation, as we  
38 found one misdiagnosed NSTEMI very early presenter with non-elevated copeptin.  
39  
40  
41  
42  
43  
44  
45  
46  
47  
48  
49  
50  
51  
52  
53  
54

55 Lastly, our results are reinforced by those of Stallone et al who found that the additional use  
56 of copeptin did not increase diagnostic accuracy in very early presenters (6). Furthermore, the  
57  
58  
59  
60

1  
2  
3 NPV for the combination of HS-cTnT and copeptin was lower in patients arriving in the first  
4  
5 2 hours than in those arriving after 2 hours (6). However, these authors did not evaluate the  
6  
7 LoD nor LoB of HS-cTnT in their work. We here report that even when lowering the cutoff of  
8  
9 HS-cTnT, the combination of HS-cTnT and copeptin seems not enough to detect all NSTEMI  
10  
11 among all very early presenters. Our study and the one of Stallone et al. (6) are in accordance  
12  
13 with previous studies that have shown that there is no or marginal benefit when adding  
14  
15 copeptin to HS-cTn assays; indeed, Wildi et al. indicated that copeptin provides no significant  
16  
17 increase in AUC when combined to HS-cTn (29), either in their all population or in patients  
18  
19 with CPO<4h. These authors found an incremental value in sensitivities, NPV and calculating  
20  
21 the integrated discrimination improvement index (IDI), but they did not evaluated low HS-  
22  
23 cTn thresholds such as LoB and LoD values (29).

24  
25  
26  
27  
28 Of note, all patients with CPO >4 hours had detectable cTnI and HS-cTnT, i.e. the use of  
29  
30 copeptin in this situation added no gain. Other studies reported that copeptin testing for the  
31  
32 rule out of NSTEMI should be limited to CPO< 6 hours (1,13). According to our data, the  
33  
34 added value of copeptin might be more restricted, but further studies are needed to confirm  
35  
36 our findings.

37  
38  
39  
40 The current ESC guidelines incorporate an additional criterion for direct rule-out of patients  
41  
42 that are not very early presenters; indeed, the rapid rule-out using a single measurement at  
43  
44 admission is possible only if CPO is >3h (1). Furthermore, this rapid algorithm can be used  
45  
46 only for 3 HS-cTn assays, including HS-cTnT. Considering our data about patients with CPO  
47  
48 >4h, we note that our conclusions are in line with the recommendations. Therefore, the use of  
49  
50 a single measurement at admission might be used for a safe rule-out in patients that are not  
51  
52 very early presenters. The alternative rule-out criteria, combining baseline concentration and  
53  
54 1h-change, should be used in early presenters.  
55  
56  
57  
58  
59  
60

### Limitations of our study

First, it is a post-hoc analysis of three previously published studies, and some data are missing (vital signs at admission, details in ECG findings for example). Second, only a single measurement of troponin at admission was considered for this analysis, and we did not evaluate its kinetics; we therefore cannot comment on the accuracy of the recent 1h algorithm in our population (1,2). Third, different cTn assays were used across the different centers (11–13) and we had to normalize cTnI values before analysis in order to minimize bias. However, all centers evaluated the same HS-cTnT and copeptin. Fourth, as the gold standard diagnosis was based on a non-HS cTn, we recognize that this could result in underdiagnosis of myocardial injury. Previous studies have shown that an early rule-out of NSTEMI using hs-cTn alone, also in the vulnerable subgroup of early presenters, is safe (with high AUC, sensitivities and NPV in patients presenting with CPO<3h) (20). In our study, the combined biomarkers are not safe-enough for early rule-out of NSTEMI in patients presenting very early (CPO<2h). The fact that gold standard diagnoses were adjudicated by the use of a conventional but not a hs-cTn assay, and that different assays were used, may have led to underdiagnose patients. This point limits the generalizability of our findings and explains why sensitivities and NPVs were much lower as compared to previous studies. However, our results are comparable to those of Stallone et al how recently used an HS-cTn, as suggested by our AUC (0.85[95%CI : 0.79-0.90]) in comparison to those of Stallone (0.86 [95%CI:0.82-.090]) (6). However, the aim of our work is not to evaluate another time global HS-cTn accuracy, but to highlight CPO effects on diagnostic accuracy of HS-cTn combined or not to copeptin. Fifth, we examined 3 subgroups with CPO<2h, 2-4h and 4h and defined very early presenters as those having CPO <2 hours, as based on the accepted definition of early presenters (20). Even if very early presenters represent more than one third of the studied population, the number of very early presenters (CPO<2h) is relatively small,

1  
2  
3 although data from three cohorts was used. This explains why false rule-out of 3 patients  
4  
5 results in a significant drop in sensitivity and NPV. Many previous studies investigated the  
6  
7 rule-out performance in early presenters using e.g. the LoD of hs-cTnT and hs-cTnI and found  
8  
9 much higher sensitivities and NPVs. This can be explained due to a larger number of patients  
10  
11  
12 (4, 20).  
13

## 14 **Conclusion**

15  
16 A single measurement of HS-cTnT alone or in combination with copeptin at admission seems  
17  
18 not sensitive enough to safely rule out NSTEMI in very early presenters (chest pain onset < 2  
19  
20 hours from ED admission). If other studies confirm our findings, another strategy to safely  
21  
22 exclude NSTEMI in this specific population that represents one third of chest pain patients is  
23  
24 warranted.  
25  
26  
27  
28  
29  
30  
31

## 32 **Acknowledgments**

33  
34 The authors would like to thank again the nursing, technical and medical staff at the  
35  
36 emergency departments and biochemistry laboratories for their assistance throughout the  
37  
38 original studies.  
39

40  
41 Reagents for the Kryptor<sup>®</sup> Compact Plus and HS-cTnT assays used for the 3 studies were  
42  
43 kindly provided by ThermoFisher Scientific and Roche Diagnostic, France, respectively.  
44  
45  
46  
47  
48  
49

## 50 **Figure legends:**

51  
52 **Figure 1:** Flow chart of the studied population.  
53

54  
55 **Figure 2:** ROC curves of cTn for the diagnosis of NSTEMI, alone or in combination with  
56  
57 copeptin. A, CPO<2h; B, CPO 2-4h; C. CPO >4h.  
58  
59  
60

**Contributorship statement:**

PR, CM, MS, and NP contributed to the design and inclusions. CCG, SL, AMD and GL realized sample collections and biomarker measurements. CCG and PR realized statistical analysis. All authors approved the final manuscript. ThermoFisher Scientific and Roche Diagnostic provided reagents.

**Competing interests:**

CCG, PR and CM received honorarias and lecture fees from Roche Diagnostics and Thermofisher Scientific.

**Funding:**

None

**Data sharing statement:**

Extra data can be accessed via the Dryad data repository at <http://datadryad.org/> with the doi: <https://doi.org/10.5061/dryad.8t87571>

## References

1. Roffi M, Patrono C, Collet J-P, Mueller C, Valgimigli M, Andreotti F, et al. 2015 ESC Guidelines for the management of acute coronary syndromes in patients presenting without persistent ST-segment elevation: Task Force for the Management of Acute Coronary Syndromes in Patients Presenting without Persistent ST-Segment Elevation of the European Society of Cardiology (ESC). *Eur Heart J*. 2016;37(3):267-315.
2. Mueller C, Giannitsis E, Christ M, Ordóñez-Llanos J, deFilippi C, McCord J, et al. Multicenter Evaluation of a 0-Hour/1-Hour Algorithm in the Diagnosis of Myocardial Infarction With High-Sensitivity Cardiac Troponin T. *Ann Emerg Med*. 2016;68(1):76-87.e4.
3. Wildi K, Nelles B, Twerenbold R, Rubini Giménez M, Reichlin T, Singeisen H, et al. Safety and efficacy of the 0 h/3 h protocol for rapid rule out of myocardial infarction. *Am Heart J*. 2016;181:16-25.
4. Boeddinghaus J, Nestelberger T, Twerenbold R, Wildi K, Badertscher P, Cupa J, et al. Direct Comparison of Four Very Early Rule-Out Strategies for Acute Myocardial Infarction Using High-Sensitivity Cardiac Troponin I. *Circulation*. 2017;135(17):1597-1611
5. Pickering JW, Than MP, Cullen L, Aldous S, Ter Avest E, Body R, et al. Rapid Rule-out of Acute Myocardial Infarction With a Single High-Sensitivity Cardiac Troponin T Measurement Below the Limit of Detection: A Collaborative Meta-analysis. *Ann Intern Med*. 2017;166(10):715-724.
6. Stallone F, Schoenenberger AW, Puelacher C, Rubini Gimenez M, Walz B, Naduvilekoot Devasia A, et al. Incremental value of copeptin in suspected acute myocardial infarction very early after symptom onset. *Eur Heart J Acute Cardiovasc Care*. 2016;5(5):407-15.
7. Chenevier-Gobeaux C, Lefevre G, Bonnefoy-Cudraz E, Charpentier S, Dehoux M, Meune C, et al. Why a new algorithm using high-sensitivity cardiac troponins for the rapid

1  
2  
3 rule-out of NSTEMI is not adapted to routine practice. *Clin Chem Lab Med*.  
4  
5 2016;54(10):e279-280.  
6

7  
8 8. Keller T, Tzikas S, Zeller T, Czyz E, Lillpopp L, Ojeda FM, et al. Copeptin improves  
9  
10 early diagnosis of acute myocardial infarction. *J Am Coll Cardiol*. 2010;55(19):2096-106.  
11

12  
13 9. Reichlin T, Hochholzer W, Stelzig C, Laule K, Freidank H, Morgenthaler NG, et al.  
14  
15 Incremental value of copeptin for rapid rule out of acute myocardial infarction. *J Am Coll*  
16  
17 *Cardiol*. 2009;54(1):60-8.  
18

19  
20 10. Lipinski MJ, Escárcega RO, D'Ascenzo F, Magalhães MA, Baker NC, Torguson R, et  
21  
22 al. A systematic review and collaborative meta-analysis to determine the incremental value of  
23  
24 copeptin for rapid rule-out of acute myocardial infarction. *Am J Cardiol*. 2014;113(9):1581-  
25  
26 91.  
27

28  
29 11. Raskovalova T, Twerenbold R, Collinson PO, Keller T, Bouvaist H, Folli C, et al.  
30  
31 Diagnostic accuracy of combined cardiac troponin and copeptin assessment for early rule-out  
32  
33 of myocardial infarction: a systematic review and meta-analysis. *Eur Heart J Acute*  
34  
35 *Cardiovasc Care*. 2014;3(1):18-27.  
36

37  
38 12. Chenevier-Gobeaux C, Freund Y, Claessens Y-E, Guérin S, Bonnet P, Doumenc B, et  
39  
40 al. Copeptin for rapid rule out of acute myocardial infarction in emergency department. *Int J*  
41  
42 *Cardiol*. 2013;166(1):198-204.  
43

44  
45 13. Möckel M, Searle J, Hamm C, Slagman A, Blankenberg S, Huber K, et al. Early  
46  
47 discharge using single cardiac troponin and copeptin testing in patients with suspected acute  
48  
49 coronary syndrome (ACS): a randomized, controlled clinical process study. *Eur Heart J*.  
50  
51 2015;36(6):369-76.  
52

53  
54 14. Sebbane M, Lefebvre S, Kuster N, Jreige R, Jacques E, Badiou S, et al. Early rule out  
55  
56 of acute myocardial infarction in ED patients: value of combined high-sensitivity cardiac  
57  
58  
59  
60

1  
2  
3 troponin T and ultrasensitive copeptin assays at admission. *Am J Emerg Med.*  
4  
5 2013;31(9):1302-8.  
6

7  
8 15. Chenevier-Gobeaux C, Meune C, Lefevre G, Doumenc B, Sorbets E, Peschanski N, et  
9  
10 al. A single value of high-sensitive troponin T below the limit of detection is not enough for  
11  
12 ruling out non ST elevation myocardial infarction in the emergency department. *Clin*  
13  
14 *Biochem.* 2016;49(15):1113-7.  
15

16  
17 16. Bossuyt PM, Reitsma JB, Bruns DE, Gatsonis CA, Glasziou PP, Irwig LM, et al. The  
18  
19 STARD statement for reporting studies of diagnostic accuracy: explanation and elaboration.  
20  
21 *Ann Intern Med.* 2003;138(1):W1-12.  
22

23  
24 17. Hamm CW, Bassand J-P, Agewall S, Bax J, Boersma E, Bueno H, et al. ESC  
25  
26 Guidelines for the management of acute coronary syndromes in patients presenting without  
27  
28 persistent ST-segment elevation: The Task Force for the management of acute coronary  
29  
30 syndromes (ACS) in patients presenting without persistent ST-segment elevation of the  
31  
32 European Society of Cardiology (ESC). *Eur Heart J.* 2011;32(23):2999-3054.  
33

34  
35 18. Thygesen K, Alpert JS, Jaffe AS, Simoons ML, Chaitman BR, White HD, et al. Third  
36  
37 universal definition of myocardial infarction. *Circulation.* 2012;126(16):2020-35.  
38

39  
40 19. Keller T, Zeller T, Ojeda F, Tzikas S, Lillpopp L, Sinning C, et al. Serial changes in  
41  
42 highly sensitive troponin I assay and early diagnosis of myocardial infarction. *JAMA.*  
43  
44 2011;306(24):2684-93.  
45

46  
47 20. Reichlin T, Hochholzer W, Bassetti S, Steuer S, Stelzig C, Hartwiger S, et al. Early  
48  
49 diagnosis of myocardial infarction with sensitive cardiac troponin assays. *N Engl J Med.*  
50  
51 2009;361(9):858-67.  
52

53  
54 21. Twerenbold R, Neumann JT, Sørensen NA, Ojeda F, Karakas M, Boeddinghaus J, et  
55  
56 al. Prospective Validation of the 0/1-h Algorithm for Early Diagnosis of Myocardial  
57  
58 Infarction. *J Am Coll Cardiol.* 2018;72:620-632.  
59  
60



- 1  
2  
3 22. Righini M, Aujesky D, Roy P-M, Cornuz J, de Moerloose P, Bounameaux H, et al.  
4  
5 Clinical usefulness of D-dimer depending on clinical probability and cutoff value in  
6  
7 outpatients with suspected pulmonary embolism. *Arch Intern Med.* 2004;164(22):2483-7.  
8  
9  
10 23. Boeddinghaus J, Reichlin T, Nestelberger T, Twerenbold R, Meili Y, Wildi K, et al.  
11  
12 Early diagnosis of acute myocardial infarction in patients with mild elevations of cardiac  
13  
14 troponin. *Clin Res Cardiol.* 2017;106(6):457-467.  
15  
16  
17 24. Mokhtari A, Lindahl B, Schiopu A, Yndigegn T, Khoshnood A, Gilje P, et al. A 0h/1h  
18  
19 protocol for safe early discharge of chest pain patients. *Acad Emerg Med.* 2017;24(8):983-  
20  
21 992.  
22  
23  
24 25. White HD. Pathobiology of troponin elevations: do elevations occur with myocardial  
25  
26 ischemia as well as necrosis? *J Am Coll Cardiol.* 2011;57(24):2406-8.  
27  
28  
29 26. Korley FK. The Wait for High-Sensitivity Troponin Is Over-Proceed Cautiously.  
30  
31 *JAMA Cardiol.* 2018;3(2):112-113.  
32  
33  
34 27. Gu YL, Voors AA, Zijlstra F, Hillege HL, Struck J, Masson S, et al. Comparison of  
35  
36 the temporal release pattern of copeptin with conventional biomarkers in acute myocardial  
37  
38 infarction. *Clin Res Cardiol Off J Ger Card Soc.* 2011;100(12):1069-76.  
39  
40  
41 28. Slagman A, Searle J, Müller C, Möckel M. Temporal release pattern of copeptin and  
42  
43 troponin T in patients with suspected acute coronary syndrome and spontaneous acute  
44  
45 myocardial infarction. *Clin Chem.* 2015;61(10):1273-82.  
46  
47  
48 29. Wildi K, Zellweger C, Twerenbold R, Jaeger C, Reichlin T, Haff P, et al. Incremental  
49  
50 value of copeptin to highly sensitive cardiac troponin I for rapid rule-out of myocardial  
51  
52 infarction. *Int J Cardiol.* 2015;190:170-6.  
53  
54  
55  
56  
57  
58  
59  
60

**Table 1:** Main characteristics of original study designs

|                                    | <b>Sebbane et al. (14)</b>                                                 | <b>Chenevier-Gobeaux et al. (15)</b>                                                                                              |
|------------------------------------|----------------------------------------------------------------------------|-----------------------------------------------------------------------------------------------------------------------------------|
| <b>Inclusion Criteria</b>          | Prospective cohort of ED patients with CPO <12h                            | Consecutive patients, >18 years old, admitted to the ED or to the ICU by pre-hospital emergency ambulances                        |
| <b>Exclusion criteria</b>          | Patients with traumatic causes of chest pain                               | Patients <18 years old<br>Acute or chronic renal failure requiring dialysis                                                       |
| <b>Plasma sampling and storage</b> | Heparinized and EDTA blood collection. Storage at -80°C for later analysis | Heparinized blood collection after routine cTnI measurement. Storage at -40°C until HS-cTnT and copeptin measurement              |
| <b>Registration number/name</b>    | French Health Ministry (no. DC-2009-1052)                                  | French Local Ethic comity « Comité de Protection des Personnes Ile-de-France » III (Hôpital Cochin) et VI (CHU Pitié-Salpêtrière) |
| <b>Consent</b>                     | Written informed consent                                                   | Cochin Hospital: waiver of informed consent was authorized. Pitié-Salpêtrière Hospital: informed consent was granted.             |

**Table 2:** Main Characteristics of the studied population

|                                                 | All patients | CPO <2h<br>(very early<br>presenters) | CPO 2-4h   | CPO 4-6h   |
|-------------------------------------------------|--------------|---------------------------------------|------------|------------|
| <b>n</b>                                        | 449          | 160                                   | 143        | 146        |
| <b>Age (years)</b>                              | 58 ± 17      | 57 ± 16                               | 59 ± 17    | 58 ± 17    |
| <b>Men</b>                                      | 281 (63)     | 101 (63)                              | 96 (67)    | 84 (58)    |
| <b>Past medical history:</b>                    |              |                                       |            |            |
| Familial history of<br>CAD, present/total (%) * | 104/301 (35) | 63/147 (43)                           | 26/90 (29) | 15/64 (23) |
| Personal history of<br>CAD                      | 168 (37)     | 61 (38)                               | 57 (40)    | 50 (34)    |
| Dyslipidaemia                                   | 67 (15)      | 20 (13)                               | 22 (15)    | 25 (17)    |
| Diabetes                                        | 176 (39)     | 72 (45)                               | 51 (37)    | 53 (36)    |
| Smoking                                         | 158 (35)     | 52 (33)                               | 58 (41)    | 48 (33)    |
| Hypertension                                    |              |                                       |            |            |
| <b>Outcome:</b>                                 |              |                                       |            |            |
| Coronary angiography                            | 131 (29)     | 49 (31)                               | 46 (32)    | 36 (25)    |
| Admission                                       | 256 (57)     | 98 (61)                               | 91 (63)    | 67 (46)    |
| <b>Final Diagnostic:</b>                        |              |                                       |            |            |
| NSTEMI                                          | 55 (12)      | 15 (9)                                | 22 (13)    | 18 (12)    |
| other                                           | 394 (88)     | 145 (91)                              | 121 (85)   | 128 (88)   |

CAD, coronary artery disease; CPO, chest pain onset; NSTEMI, non ST-elevation myocardial infarction.

Results are expressed in mean ± SD or in number (percentage)

\*, missing data exist for this variable.

**Table 3:** AUC values according to CPO category

|                                       | <b>Biomarker</b>   | AUC   | 95% CI         |
|---------------------------------------|--------------------|-------|----------------|
| CPO <2h<br>(very early<br>presenters) | cTnI               | 0.841 | 0.775 to 0.894 |
|                                       | cTnI + copeptin    | 0.880 | 0.819 to 0.926 |
|                                       | HS-cTnT            | 0.853 | 0.789 to 0.904 |
|                                       | HS-cTnT + copeptin | 0.897 | 0.840 to 0.940 |
| CPO 2-4h                              | cTnI               | 0.886 | 0.823 to 0.933 |
|                                       | cTnI + copeptin    | 0.915 | 0.857 to 0.955 |
|                                       | HS-cTnT            | 0.869 | 0.802 to 0.919 |
|                                       | HS-cTnT + copeptin | 0.891 | 0.829 to 0.937 |
| CPO >4h                               | cTnI               | 0.995 | 0.965 to 1.000 |
|                                       | cTnI + copeptin    | 0.979 | 0.940 to 0.995 |
|                                       | HS-cTnT            | 0.980 | 0.942 to 0.996 |
|                                       | HS-cTnT + copeptin | 0.953 | 0.905 to 0.981 |

AUC, area under the ROC curve; CPO, chest pain onset

**Table 4:** Diagnostic performances for NSTEMI according to onset chest pain

| CPO                                                    | Biomarker            | Threshold             | Sensitivity<br>(%, [95%CI]) | Specificity<br>(%, [95%CI]) | Negative<br>predictive value<br>(%, [95%CI]) | Positive<br>predictive value<br>(%, [95%CI]) | Misdiagnosed<br>(**) (n) | Correctly ruled-<br>out, n (%) |
|--------------------------------------------------------|----------------------|-----------------------|-----------------------------|-----------------------------|----------------------------------------------|----------------------------------------------|--------------------------|--------------------------------|
| <b>&lt;2h</b><br>(very early<br>presenters)<br>(n=160) | cTnI                 | LoQ (*)               | 73 [45-91]                  | 97 [92-99]                  | 97 [92-99]                                   | 73 [45-91]                                   | 4                        | 141 (88)                       |
|                                                        | cTnI + copeptin      | LoQ (*) and 12 pmol/L | 87 [59-98]                  | 60 [52-68] ε                | 98 [92-100]                                  | 18 [7-24] ε                                  | 2                        | 87 (54) ε                      |
|                                                        | HScTnT               | 14 ng/L               | 80 [51-95]                  | 85 [78-90] ε                | 98 [93-100]                                  | 35 [20-53]                                   | 3                        | 123 (79) ε                     |
|                                                        |                      | 5 ng/L                | 87 [59-98]                  | 58 [50-66] ε ζ              | 98 [92-100]                                  | 18 [10-29] ε                                 | 2                        | 84 (52) ε ζ                    |
|                                                        | HS-cTnT+copeptin     | 3 ng/L                | 87[58-98]                   | 40 [32-49] ε ζ              | 97 [88-99]                                   | 13 [7-22] ε                                  | 2                        | 58 (36) ε ζ                    |
|                                                        |                      | 14 ng/L and 12 pmol/L | 93 [66-100]                 | 54 [46-62] ε ζ              | 99 [93-100]                                  | 18 [10-29] ε                                 | 1                        | 79 (49) ε ζ                    |
|                                                        |                      | 5 ng/L and 12 pmol/L  | 93 [66-100]                 | 41 [33-50] ε ζ              | 98 [89-100]                                  | 14 [8-23] ε                                  | 1                        | 59 (37) ε ζ                    |
|                                                        | 3 ng/L and 12 pmol/L | 93 [66-100]           | 25 [19-34] ε ζ              | 97 [85-100]                 | 12 [7-19] ε                                  | 1                                            | 37 (23) ε ζ              |                                |
| <b>2-4h</b><br>(n=143)                                 | cTnI                 | LoQ (*)               | 73 [50-89]                  | 95 [89-98]                  | 95 [89-98] ψ                                 | 73 [50-89]                                   | 6                        | 115 (80)                       |
|                                                        | cTnI + copeptin      | LoQ (*) and 12 pmol/L | 95 [75-100]                 | 57 [48-66] ε                | 99 [92-100]                                  | 29 [19-41] ε                                 | 1                        | 69 (48) ε                      |
|                                                        | HScTnT               | 14 ng/L               | 77 [54-91]                  | 79 [71-86] ε                | 95 [88-98] ψ                                 | 40 [26-56]                                   | 5                        | 96 (67) ε μ                    |
|                                                        |                      | 5 ng/L                | 91 [70-98]                  | 55 [46-64] ε ζ              | 97 [89-100]                                  | 27 [18-39] ε                                 | 2                        | 67 (47) ε ζ                    |
|                                                        | HS-cTnT+copeptin     | 3 ng/L                | 96 [75-100]                 | 45 [36-54] ε ζ              | 98 [89-100]                                  | 24 [16-34] ε                                 | 1                        | 54 (38) ε ζ                    |
|                                                        |                      | 14 ng/L and 12 pmol/L | 95 [75-100]                 | 50 [41-59] ε ζ              | 99 [91-100]                                  | 25 [17-36] ε                                 | 1                        | 58 (41) ε ζ                    |
|                                                        |                      | 5 ng/L and 12 pmol/L  | 100 [82-100]                | 35 [27-44] ε ζ              | 100 [90-100]                                 | 22 [15-32] ε                                 | 0                        | 42 (29) ε ζ                    |
|                                                        | 3 ng/L and 12 pmol/L | 100 [82-100]          | 29 [21-38] ε ζ              | 100 [88-100]                | 20 [14-30] ε                                 | 0                                            | 35 (25) ε ζ              |                                |
| <b>&gt;4h</b><br>(n=146)                               | cTnI                 | LoQ (*)               | 100 [77-100]                | 96 [91-99]                  | 100 [96-100]                                 | 77 [54-91]                                   | 0                        | 122 (85)                       |
|                                                        | cTnI + copeptin      | LoQ (*) and 12 pmol/L | 100 [77-100]                | 59 [50-68] ε                | 100 [94-100]                                 | 25 [16-37] ε                                 | 0                        | 75 (54) ε                      |
|                                                        | HScTnT               | 14 ng/L               | 100 [78-100]                | 87 [80-92] ε                | 100 [96-100]                                 | 51 [34-68]                                   | 0                        | 111 (77)                       |
|                                                        |                      | 5 ng/L                | 100 [78-100]                | 60 [51-68] ε ζ              | 100 [94-100]                                 | 35 [23-50] ε                                 | 0                        | 77 (53) ε μ ζ                  |
|                                                        | HS-cTnT+copeptin     | 3 ng/L                | 100 [78-100]                | 52 [43-61] ε ζ              | 100 [96-100]                                 | 23 [14-34] ε                                 | 0                        | 67 (47) ε ζ                    |
|                                                        |                      | 14 ng/L and 12 pmol/L | 100 [78-100]                | 55 [46-64] ε ζ              | 100 [94-100]                                 | 24 [15-35] ε                                 | 0                        | 70 (49) ε ζ                    |
|                                                        |                      | 5 ng/L and 12 pmol/L  | 100 [78-100]                | 40 [32-49] ε ζ              | 100 [91-100]                                 | 19 [12-29] ε ζ                               | 0                        | 51 (35) ε ζ                    |
|                                                        | 3 ng/L and 12 pmol/L | 100 [78-100]          | 34 [26-43] ε ζ              | 100 [96-100]                | 18 [11-27] ε ζ                               | 0                                            | 43 (30) ε ζ              |                                |

(\*) 0.04 μg/L (40 ng/L) for Bicêtre and Montpellier hospitals, 0.14 μg/L (140 ng/L) for other sites; (\*\*), false negative patients

ε p<0.05 versus cTnI alone; ζ p<0.05 versus HS-cTnT <14 ng/L alone; ψ p<0.05 versus delay >4h; μ, p<0.05 versus delay <2h

**Table 5:** Potentially misdiagnosed patients with low cTn thresholds and copeptin

| Sex | Age  | Dyslipidaemia | Smoke | Diabetes | Hypertension | Personal history of CAD | Chest pain since : | CPO' category               | cTnI                | HScTnT    | Copeptin     |
|-----|------|---------------|-------|----------|--------------|-------------------------|--------------------|-----------------------------|---------------------|-----------|--------------|
| M   | 89   | no            | no    | no       | yes          | yes                     | 1 hr 15 min        | <2h (very early presenters) | 0.04 µg/L (40 ng/L) | 44.9 ng/L | 208.7 pmol/L |
| M   | 86   | yes           | no    | no       | yes          | yes                     | 30 min             |                             | 0.06 µg/L (60 ng/L) | 11.3 ng/L | 77.2 pmol/L  |
| W   | 35   | no            | no    | no       | no           | no                      | 50 min             |                             | 0.01 µg/L (10 ng/L) | <3 ng/L   | 54.7 pmol/L  |
| W   | 44   | no            | yes   | no       | no           | no                      | 45 min             |                             | 0.01 µg/L (10 ng/L) | <3 ng/L   | 10.7 pmol/L  |
| W   | 74   | yes           | no    | no       | yes          | yes                     | 3 hrs              | 2-4h                        | 0.04 µg/L (40 ng/L) | 8.8 ng/L  | 10.7 pmol/L  |
| M   | 34,2 | yes           | yes   | no       | no           | no                      | 2 hrs 35 min       |                             | 0.04 µg/L (40 ng/L) | <3 ng/L   | 23.5 pmol/L  |
| M   | 55   | yes           | no    | no       | no           | yes                     | 3 hrs 50 min       |                             | 0.02 µg/L (20 ng/L) | 6 ng/L    | 25.9 pmol/L  |
| M   | 34   | no            | yes   | no       | no           | no                      | 3 hrs 15 min       |                             | 0.01 µg/L (10 ng/L) | 4 ng/L    | 52.4 pmol/L  |
| M   | 61   | yes           | yes   | no       | yes          | yes                     | 3 hrs              |                             | 0.03 µg/L (30 ng/L) | 19.7 ng/L | 27.2 pmol/L  |
| M   | 59   | no            | no    | no       | no           | no                      | 2 hrs 45 min       |                             | 0.04 µg/L (40 ng/L) | 10.1 ng/L | 241.8 pmol/L |

CAD, coronary artery disease; CPO, chest pain onset; M, men; W, women.



Figure 1: Flow chart of the studied population.

135x255mm (150 x 150 DPI)



Figure 2: ROC curves of cTn for the diagnosis of NSTEMI, alone or in combination with copeptin. A, CPO < 2h; B, CPO 2-4h; C. CPO > 4h.



| Section & Topic          | No  | Item                                                                                                                                                   | Reported on page #                   |
|--------------------------|-----|--------------------------------------------------------------------------------------------------------------------------------------------------------|--------------------------------------|
| <b>TITLE OR ABSTRACT</b> |     |                                                                                                                                                        |                                      |
|                          | 1   | Identification as a study of diagnostic accuracy using at least one measure of accuracy (such as sensitivity, specificity, predictive values, or AUC)  | Page 1                               |
| <b>ABSTRACT</b>          |     |                                                                                                                                                        |                                      |
|                          | 2   | Structured summary of study design, methods, results, and conclusions (for specific guidance, see STARD for Abstracts)                                 | Page 2                               |
| <b>INTRODUCTION</b>      |     |                                                                                                                                                        |                                      |
|                          | 3   | Scientific and clinical background, including the intended use and clinical role of the index test                                                     | Page 4                               |
|                          | 4   | Study objectives and hypotheses                                                                                                                        | Pages 4 and 5                        |
| <b>METHODS</b>           |     |                                                                                                                                                        |                                      |
| <i>Study design</i>      | 5   | Whether data collection was planned before the index test and reference standard were performed (prospective study) or after (retrospective study)     | Page 6                               |
| <i>Participants</i>      | 6   | Eligibility criteria                                                                                                                                   | pp6&7 + Table1 p22                   |
|                          | 7   | On what basis potentially eligible participants were identified (such as symptoms, results from previous tests, inclusion in registry)                 | Pages 6-8                            |
|                          | 8   | Where and when potentially eligible participants were identified (setting, location and dates)                                                         | Page 6                               |
|                          | 9   | Whether participants formed a consecutive, random or convenience series                                                                                | Page 6                               |
| <i>Test methods</i>      | 10a | Index test, in sufficient detail to allow replication                                                                                                  | Pages 8 and 9                        |
|                          | 10b | Reference standard, in sufficient detail to allow replication                                                                                          | Pages 8 and 9                        |
|                          | 11  | Rationale for choosing the reference standard (if alternatives exist)                                                                                  | Page 7                               |
|                          | 12a | Definition of and rationale for test positivity cut-offs or result categories of the index test, distinguishing pre-specified from exploratory         | Page 9                               |
|                          | 12b | Definition of and rationale for test positivity cut-offs or result categories of the reference standard, distinguishing pre-specified from exploratory | Pages 8 and 9                        |
|                          | 13a | Whether clinical information and reference standard results were available to the performers/readers of the index test                                 | Pages 6, 8 and 9                     |
|                          | 13b | Whether clinical information and index test results were available to the assessors of the reference standard                                          | Page 7                               |
| <i>Analysis</i>          | 14  | Methods for estimating or comparing measures of diagnostic accuracy                                                                                    | Page 9                               |
|                          | 15  | How indeterminate index test or reference standard results were handled                                                                                | Page 7                               |
|                          | 16  | How missing data on the index test and reference standard were handled                                                                                 | Flow chart (Figure1) + pages 6 and 7 |
|                          | 17  | Any analyses of variability in diagnostic accuracy, distinguishing pre-specified from exploratory                                                      | Pages 6 and 7                        |
|                          | 18  | Intended sample size and how it was determined                                                                                                         | NA                                   |
| <b>RESULTS</b>           |     |                                                                                                                                                        |                                      |
| <i>Participants</i>      | 19  | Flow of participants, using a diagram                                                                                                                  | Flow chart (Figure1) + pages 6 and 7 |
|                          | 20  | Baseline demographic and clinical characteristics of participants                                                                                      | Table 2, page 23                     |
|                          | 21a | Distribution of severity of disease in those with the target condition                                                                                 | Table 2, page 23                     |
|                          | 21b | Distribution of alternative diagnoses in those without the target condition                                                                            | Table 2, page 23                     |
|                          | 22  | Time interval and any clinical interventions between index test and reference standard                                                                 | NA                                   |
| <i>Test results</i>      | 23  | Cross tabulation of the index test results (or their distribution) by the results of the reference standard                                            | Tables 3&4, p.24-25                  |
|                          | 24  | Estimates of diagnostic accuracy and their precision (such as 95% confidence intervals)                                                                | Table 4, page25                      |
|                          | 25  | Any adverse events from performing the index test or the reference standard                                                                            | Table 5 page 26                      |
| <b>DISCUSSION</b>        |     |                                                                                                                                                        |                                      |
|                          | 26  | Study limitations, including sources of potential bias, statistical uncertainty, and generalisability                                                  | Page 15                              |
|                          | 27  | Implications for practice, including the intended use and clinical role of the index test                                                              | Page 16                              |
| <b>OTHER INFORMATION</b> |     |                                                                                                                                                        |                                      |
|                          | 28  | Registration number and name of registry                                                                                                               | Table 1, page22                      |
|                          | 29  | Where the full study protocol can be accessed                                                                                                          | Table 1 page 22                      |
|                          | 30  | Sources of funding and other support; role of funders                                                                                                  | NA                                   |

# STARD 2015

---

## AIM

STARD stands for “Standards for Reporting Diagnostic accuracy studies”. This list of items was developed to contribute to the completeness and transparency of reporting of diagnostic accuracy studies. Authors can use the list to write informative study reports. Editors and peer-reviewers can use it to evaluate whether the information has been included in manuscripts submitted for publication.

---

## EXPLANATION

A **diagnostic accuracy study** evaluates the ability of one or more medical tests to correctly classify study participants as having a **target condition**. This can be a disease, a disease stage, response or benefit from therapy, or an event or condition in the future. A medical test can be an imaging procedure, a laboratory test, elements from history and physical examination, a combination of these, or any other method for collecting information about the current health status of a patient.

The test whose accuracy is evaluated is called **index test**. A study can evaluate the accuracy of one or more index tests. Evaluating the ability of a medical test to correctly classify patients is typically done by comparing the distribution of the index test results with those of the **reference standard**. The reference standard is the best available method for establishing the presence or absence of the target condition. An accuracy study can rely on one or more reference standards.

If test results are categorized as either positive or negative, the cross tabulation of the index test results against those of the reference standard can be used to estimate the **sensitivity** of the index test (the proportion of participants *with* the target condition who have a positive index test), and its **specificity** (the proportion *without* the target condition who have a negative index test). From this cross tabulation (sometimes referred to as the contingency or “2x2” table), several other accuracy statistics can be estimated, such as the positive and negative **predictive values** of the test. Confidence intervals around estimates of accuracy can then be calculated to quantify the statistical **precision** of the measurements.

If the index test results can take more than two values, categorization of test results as positive or negative requires a **test positivity cut-off**. When multiple such cut-offs can be defined, authors can report a receiver operating characteristic (ROC) curve which graphically represents the combination of sensitivity and specificity for each possible test positivity cut-off. The **area under the ROC curve** informs in a single numerical value about the overall diagnostic accuracy of the index test.

The **intended use** of a medical test can be diagnosis, screening, staging, monitoring, surveillance, prediction or prognosis. The **clinical role** of a test explains its position relative to existing tests in the clinical pathway. A replacement test, for example, replaces an existing test. A triage test is used before an existing test; an add-on test is used after an existing test.

Besides diagnostic accuracy, several other outcomes and statistics may be relevant in the evaluation of medical tests. Medical tests can also be used to classify patients for purposes other than diagnosis, such as staging or prognosis. The STARD list was not explicitly developed for these other outcomes, statistics, and study types, although most STARD items would still apply.

---

## DEVELOPMENT

This STARD list was released in 2015. The 30 items were identified by an international expert group of methodologists, researchers, and editors. The guiding principle in the development of STARD was to select items that, when reported, would help readers to judge the potential for bias in the study, to appraise the applicability of the study findings and the validity of conclusions and recommendations. The list represents an update of the first version, which was published in 2003.

More information can be found on <http://www.equator-network.org/reporting-guidelines/stard>.



Supplement: bmjopen-2018-023994.draft_revisions.pdf [file bmjopen-2018-023994.draft_revisions.pdf]
